# Supplementary material
Source: publisher figshare collection journal article supplement (https://sage.figshare.com/ndownloader/files/20804688)
Supplement: Supplementary file 1 [file 20804688]

record_id,age,sex,hayling6_impaired,ever_delirious,ENSG00000000419_DPM1,ENSG00000000457_SCYL3,ENSG00000000460_C1orf112,ENSG00000000938_FGR,ENSG00000000971_CFH,ENSG00000001036_FUCA2,ENSG00000001084_GCLC,ENSG00000001167_NFYA,ENSG00000001460_STPG1,ENSG00000001461_NIPAL3,ENSG00000001497_LAS1L,ENSG00000001561_ENPP4,ENSG00000001629_ANKIB1,ENSG00000001630_CYP51A1,ENSG00000001631_KRIT1,ENSG00000002016_RAD52,ENSG00000002330_BAD,ENSG00000002549_LAP3,ENSG00000002586_CD99,ENSG00000002587_HS3ST1,ENSG00000002726_AOC1,ENSG00000002822_MAD1L1,ENSG00000002834_LASP1,ENSG00000002919_SNX11,ENSG00000002933_TMEM176A,ENSG00000003056_M6PR,ENSG00000003147_ICA1,ENSG00000003393_ALS2,ENSG00000003400_CASP10,ENSG00000003402_CFLAR,ENSG00000003436_TFPI,ENSG00000003509_NDUFAF7,ENSG00000003756_RBM5,ENSG00000004059_ARF5,ENSG00000004139_SARM1,ENSG00000004142_POLDIP2,ENSG00000004399_PLXND1,ENSG00000004455_AK2,ENSG00000004468_CD38,ENSG00000004478_FKBP4,ENSG00000004487_KDM1A,ENSG00000004534_RBM6,ENSG00000004660_CAMKK1,ENSG00000004700_RECQL,ENSG00000004766_VPS50,ENSG00000004777_ARHGAP33,ENSG00000004779_NDUFAB1,ENSG00000004799_PDK4,ENSG00000004809_SLC22A16,ENSG00000004838_ZMYND10,ENSG00000004864_SLC25A13,ENSG00000004866_ST7,ENSG00000004897_CDC27,ENSG00000004939_SLC4A1,ENSG00000004961_HCCS,ENSG00000004975_DVL2,ENSG00000005007_UPF1,ENSG00000005020_SKAP2,ENSG00000005022_SLC25A5,ENSG00000005059_MCUB,ENSG00000005075_POLR2J,ENSG00000005100_DHX33,ENSG00000005108_THSD7A,ENSG00000005156_LIG3,ENSG00000005175_RPAP3,ENSG00000005187_ACSM3,ENSG00000005189_AC004381.6,ENSG00000005194_CIAPIN1,ENSG00000005206_SPPL2B,ENSG00000005238_FAM214B,ENSG00000005249_PRKAR2B,ENSG00000005302_MSL3,ENSG00000005339_CREBBP,ENSG00000005379_TSPOAP1,ENSG00000005381_MPO,ENSG00000005436_GCFC2,ENSG00000005448_WDR54,ENSG00000005469_CROT,ENSG00000005471_ABCB4,ENSG00000005483_KMT2E,ENSG00000005486_RHBDD2,ENSG00000005700_IBTK,ENSG00000005801_ZNF195,ENSG00000005810_MYCBP2,ENSG00000005812_FBXL3,ENSG00000005844_ITGAL,ENSG00000005882_PDK2,ENSG00000005884_ITGA3,ENSG00000005889_ZFX,ENSG00000005893_LAMP2,ENSG00000005961_ITGA2B,ENSG00000006007_GDE1,ENSG00000006015_C19orf60,ENSG00000006025_OSBPL7,ENSG00000006062_MAP3K14,ENSG00000006125_AP2B1,ENSG00000006194_ZNF263,ENSG00000006282_SPATA20,ENSG00000006327_TNFRSF12A,ENSG00000006432_MAP3K9,ENSG00000006451_RALA,ENSG00000006459_KDM7A,ENSG00000006530_AGK,ENSG00000006534_ALDH3B1,ENSG00000006555_TTC22,ENSG00000006576_PHTF2,ENSG00000006607_FARP2,ENSG00000006625_GGCT,ENSG00000006634_DBF4,ENSG00000006638_TBXA2R,ENSG00000006652_IFRD1,ENSG00000006695_COX10,ENSG00000006712_PAF1,ENSG00000006715_VPS41,ENSG00000006744_ELAC2,ENSG00000006756_ARSD,ENSG00000006757_PNPLA4,ENSG00000006831_ADIPOR2,ENSG00000007047_MARK4,ENSG00000007080_CCDC124,ENSG00000007129_CEACAM21,ENSG00000007168_PAFAH1B1,ENSG00000007202_KIAA0100,ENSG00000007237_GAS7,ENSG00000007255_TRAPPC6A,ENSG00000007264_MATK,ENSG00000007312_CD79B,ENSG00000007341_ST7L,ENSG00000007350_TKTL1,ENSG00000007376_RPUSD1,ENSG00000007392_LUC7L,ENSG00000007516_BAIAP3,ENSG00000007520_TSR3,ENSG00000007541_PIGQ,ENSG00000007545_CRAMP1,ENSG00000007923_DNAJC11,ENSG00000007944_MYLIP,ENSG00000007968_E2F2,ENSG00000008018_PSMB1,ENSG00000008083_JARID2,ENSG00000008086_CDKL5,ENSG00000008128_CDK11A,ENSG00000008130_NADK,ENSG00000008226_DLEC1,ENSG00000008256_CYTH3,ENSG00000008277_ADAM22,ENSG00000008282_SYPL1,ENSG00000008283_CYB561,ENSG00000008294_SPAG9,ENSG00000008300_CELSR3,ENSG00000008311_AASS,ENSG00000008324_SS18L2,ENSG00000008382_MPND,ENSG00000008394_MGST1,ENSG00000008405_CRY1,ENSG00000008438_PGLYRP1,ENSG00000008441_NFIX,ENSG00000008513_ST3GAL1,ENSG00000008516_MMP25,ENSG00000008517_IL32,ENSG00000008710_PKD1,ENSG00000008838_MED24,ENSG00000008853_RHOBTB2,ENSG00000008869_HEATR5B,ENSG00000008952_SEC62,ENSG00000008988_RPS20,ENSG00000009307_CSDE1,ENSG00000009335_UBE3C,ENSG00000009413_REV3L,ENSG00000009694_TENM1,ENSG00000009780_FAM76A,ENSG00000009790_TRAF3IP3,ENSG00000009830_POMT2,ENSG00000009844_VTA1,ENSG00000009954_BAZ1B,ENSG00000010017_RANBP9,ENSG00000010030_ETV7,ENSG00000010072_SPRTN,ENSG00000010165_METTL13,ENSG00000010219_DYRK4,ENSG00000010244_ZNF207,ENSG00000010256_UQCRC1,ENSG00000010270_STARD3NL,ENSG00000010278_CD9,ENSG00000010292_NCAPD2,ENSG00000010295_IFFO1,ENSG00000010318_PHF7,ENSG00000010322_NISCH,ENSG00000010327_STAB1,ENSG00000010361_FUZ,ENSG00000010404_IDS,ENSG00000010539_ZNF200,ENSG00000010610_CD4,ENSG00000010626_LRRC23,ENSG00000010671_BTK,ENSG00000010704_HFE,ENSG00000010803_SCMH1,ENSG00000010810_FYN,ENSG00000010818_HIVEP2,ENSG00000011007_TCEB3,ENSG00000011009_LYPLA2,ENSG00000011021_CLCN6,ENSG00000011028_MRC2,ENSG00000011105_TSPAN9,ENSG00000011114_BTBD7,ENSG00000011132_APBA3,ENSG00000011143_MKS1,ENSG00000011198_ABHD5,ENSG00000011201_ANOS1,ENSG00000011243_AKAP8L,ENSG00000011258_MBTD1,ENSG00000011260_UTP18,ENSG00000011275_RNF216,ENSG00000011295_TTC19,ENSG00000011304_PTBP1,ENSG00000011376_LARS2,ENSG00000011405_PIK3C2A,ENSG00000011422_PLAUR,ENSG00000011426_ANLN,ENSG00000011451_WIZ,ENSG00000011454_RABGAP1,ENSG00000011485_PPP5C,ENSG00000011523_CEP68,ENSG00000011566_MAP4K3,ENSG00000011600_TYROBP,ENSG00000011638_TMEM159,ENSG00000012048_BRCA1,ENSG00000012061_ERCC1,ENSG00000012124_CD22,ENSG00000012171_SEMA3B,ENSG00000012174_MBTPS2,ENSG00000012211_PRICKLE3,ENSG00000012223_LTF,ENSG00000012232_EXTL3,ENSG00000012660_ELOVL5,ENSG00000012779_ALOX5,ENSG00000012817_KDM5D,ENSG00000012822_CALCOCO1,ENSG00000012963_UBR7,ENSG00000012983_MAP4K5,ENSG00000013016_EHD3,ENSG00000013275_PSMC4,ENSG00000013288_MAN2B2,ENSG00000013306_SLC25A39,ENSG00000013364_MVP,ENSG00000013374_NUB1,ENSG00000013375_PGM3,ENSG00000013392_RWDD2A,ENSG00000013441_CLK1,ENSG00000013503_POLR3B,ENSG00000013523_ANGEL1,ENSG00000013561_RNF14,ENSG00000013563_DNASE1L1,ENSG00000013573_DDX11,ENSG00000013583_HEBP1,ENSG00000013725_CD6,ENSG00000013810_TACC3,ENSG00000014123_UFL1,ENSG00000014138_POLA2,ENSG00000014164_ZC3H3,ENSG00000014216_CAPN1,ENSG00000014257_ACPP,ENSG00000014641_MDH1,ENSG00000014824_SLC30A9,ENSG00000014914_MTMR11,ENSG00000014919_COX15,ENSG00000015133_CCDC88C,ENSG00000015153_YAF2,ENSG00000015171_ZMYND11,ENSG00000015285_WAS,ENSG00000015475_BID,ENSG00000015479_MATR3,ENSG00000015532_XYLT2,ENSG00000015676_NUDCD3,ENSG00000016391_CHDH,ENSG00000016864_GLT8D1,ENSG00000017260_ATP2C1,ENSG00000017483_SLC38A5,ENSG00000017797_RALBP1,ENSG00000018189_RUFY3,ENSG00000018280_SLC11A1,ENSG00000018510_AGPS,ENSG00000018610_CXorf56,ENSG00000018699_TTC27,ENSG00000018869_ZNF582,ENSG00000019169_MARCO,ENSG00000019485_PRDM11,ENSG00000019582_CD74,ENSG00000019991_HGF,ENSG00000019995_ZRANB1,ENSG00000020129_NCDN,ENSG00000020181_ADGRA2,ENSG00000020256_ZFP64,ENSG00000020426_MNAT1,ENSG00000020577_SAMD4A,ENSG00000020633_RUNX3,ENSG00000020922_MRE11,ENSG00000021300_PLEKHB1,ENSG00000021355_SERPINB1,ENSG00000021574_SPAST,ENSG00000021645_NRXN3,ENSG00000021762_OSBPL5,ENSG00000021776_AQR,ENSG00000022267_FHL1,ENSG00000022277_RTFDC1,ENSG00000022556_NLRP2,ENSG00000022567_SLC45A4,ENSG00000022840_RNF10,ENSG00000022976_ZNF839,ENSG00000023041_ZDHHC6,ENSG00000023171_GRAMD1B,ENSG00000023191_RNH1,ENSG00000023228_NDUFS1,ENSG00000023287_RB1CC1,ENSG00000023318_ERP44,ENSG00000023330_ALAS1,ENSG00000023445_BIRC3,ENSG00000023516_AKAP11,ENSG00000023572_GLRX2,ENSG00000023608_SNAPC1,ENSG00000023697_DERA,ENSG00000023734_STRAP,ENSG00000023839_ABCC2,ENSG00000023892_DEF6,ENSG00000023902_PLEKHO1,ENSG00000023909_GCLM,ENSG00000024048_UBR2,ENSG00000024526_DEPDC1,ENSG00000024862_CCDC28A,ENSG00000025039_RRAGD,ENSG00000025156_HSF2,ENSG00000025293_PHF20,ENSG00000025434_NR1H3,ENSG00000025708_TYMP,ENSG00000025770_NCAPH2,ENSG00000025772_TOMM34,ENSG00000025796_SEC63,ENSG00000025800_KPNA6,ENSG00000026025_VIM,ENSG00000026036_RTEL1-TNFRSF6B,ENSG00000026103_FAS,ENSG00000026297_RNASET2,ENSG00000026508_CD44,ENSG00000026652_AGPAT4,ENSG00000026751_SLAMF7,ENSG00000026950_BTN3A1,ENSG00000027001_MIPEP,ENSG00000027075_PRKCH,ENSG00000027697_IFNGR1,ENSG00000027847_B4GALT7,ENSG00000027869_SH2D2A,ENSG00000028116_VRK2,ENSG00000028137_TNFRSF1B,ENSG00000028203_VEZT,ENSG00000028277_POU2F2,ENSG00000028310_BRD9,ENSG00000028528_SNX1,ENSG00000028839_TBPL1,ENSG00000029153_ARNTL2,ENSG00000029363_BCLAF1,ENSG00000029364_SLC39A9,ENSG00000029534_ANK1,ENSG00000029639_TFB1M,ENSG00000029725_RABEP1,ENSG00000029993_HMGB3,ENSG00000030066_NUP160,ENSG00000030110_BAK1,ENSG00000030419_IKZF2,ENSG00000030582_GRN,ENSG00000031003_FAM13B,ENSG00000031081_ARHGAP31,ENSG00000031691_CENPQ,ENSG00000031698_SARS,ENSG00000031823_RANBP3,ENSG00000032219_ARID4A,ENSG00000032389_TSSC1,ENSG00000032444_PNPLA6,ENSG00000032742_IFT88,ENSG00000033011_ALG1,ENSG00000033030_ZCCHC8,ENSG00000033050_ABCF2,ENSG00000033100_CHPF2,ENSG00000033170_FUT8,ENSG00000033178_UBA6,ENSG00000033327_GAB2,ENSG00000033627_ATP6V0A1,ENSG00000033800_PIAS1,ENSG00000033867_SLC4A7,ENSG00000034053_APBA2,ENSG00000034152_MAP2K3,ENSG00000034510_TMSB10,ENSG00000034533_ASTE1,ENSG00000034677_RNF19A,ENSG00000034693_PEX3,ENSG00000034713_GABARAPL2,ENSG00000035115_SH3YL1,ENSG00000035141_FAM136A,ENSG00000035403_VCL,ENSG00000035499_DEPDC1B,ENSG00000035664_DAPK2,ENSG00000035681_NSMAF,ENSG00000035687_ADSS,ENSG00000035720_STAP1,ENSG00000035862_TIMP2,ENSG00000035928_RFC1,ENSG00000036054_TBC1D23,ENSG00000036257_CUL3,ENSG00000036448_MYOM2,ENSG00000036549_ZZZ3,ENSG00000037042_TUBG2,ENSG00000037241_RPL26L1,ENSG00000037474_NSUN2,ENSG00000037637_FBXO42,ENSG00000037749_MFAP3,ENSG00000037757_MRI1,ENSG00000038002_AGA,ENSG00000038210_PI4K2B,ENSG00000038219_BOD1L1,ENSG00000038274_MAT2B,ENSG00000038358_EDC4,ENSG00000038382_TRIO,ENSG00000038427_VCAN,ENSG00000038532_CLEC16A,ENSG00000038945_MSR1,ENSG00000039068_CDH1,ENSG00000039123_SKIV2L2,ENSG00000039319_ZFYVE16,ENSG00000039523_FAM65A,ENSG00000039650_PNKP,ENSG00000040199_PHLPP2,ENSG00000040275_SPDL1,ENSG00000040341_STAU2,ENSG00000040487_PQLC2,ENSG00000040531_CTNS,ENSG00000040633_PHF23,ENSG00000040933_INPP4A,ENSG00000041353_RAB27B,ENSG00000041357_PSMA4,ENSG00000041802_LSG1,ENSG00000041880_PARP3,ENSG00000041988_THAP3,ENSG00000042062_FAM65C,ENSG00000042088_TDP1,ENSG00000042286_AIFM2,ENSG00000042317_SPATA7,ENSG00000042429_MED17,ENSG00000042445_RETSAT,ENSG00000042493_CAPG,ENSG00000042753_AP2S1,ENSG00000042832_TG,ENSG00000042980_ADAM28,ENSG00000043093_DCUN1D1,ENSG00000043143_JADE2,ENSG00000043462_LCP2,ENSG00000043514_TRIT1,ENSG00000044090_CUL7,ENSG00000044115_CTNNA1,ENSG00000044446_PHKA2,ENSG00000044459_CNTLN,ENSG00000044574_HSPA5,ENSG00000046647_GEMIN8,ENSG00000046651_OFD1,ENSG00000047056_WDR37,ENSG00000047188_YTHDC2,ENSG00000047230_CTPS2,ENSG00000047249_ATP6V1H,ENSG00000047315_POLR2B,ENSG00000047346_FAM214A,ENSG00000047365_ARAP2,ENSG00000047410_TPR,ENSG00000047578_KIAA0556,ENSG00000047579_DTNBP1,ENSG00000047597_XK,ENSG00000047621_C12orf4,ENSG00000047634_SCML1,ENSG00000047644_WWC3,ENSG00000047648_ARHGAP6,ENSG00000047849_MAP4,ENSG00000047932_GOPC,ENSG00000048028_USP28,ENSG00000048052_HDAC9,ENSG00000048140_TSPAN17,ENSG00000048162_NOP16,ENSG00000048392_RRM2B,ENSG00000048405_ZNF800,ENSG00000048462_TNFRSF17,ENSG00000048471_SNX29,ENSG00000048544_MRPS10,ENSG00000048649_RSF1,ENSG00000048707_VPS13D,ENSG00000048740_CELF2,ENSG00000048828_FAM120A,ENSG00000048991_R3HDM1,ENSG00000049089_COL9A2,ENSG00000049167_ERCC8,ENSG00000049192_ADAMTS6,ENSG00000049239_H6PD,ENSG00000049245_VAMP3,ENSG00000049246_PER3,ENSG00000049249_TNFRSF9,ENSG00000049323_LTBP1,ENSG00000049449_RCN1,ENSG00000049541_RFC2,ENSG00000049618_ARID1B,ENSG00000049656_CLPTM1L,ENSG00000049759_NEDD4L,ENSG00000049769_PPP1R3F,ENSG00000049860_HEXB,ENSG00000049883_PTCD2,ENSG00000050030_KIAA2022,ENSG00000050130_JKAMP,ENSG00000050344_NFE2L3,ENSG00000050393_MCUR1,ENSG00000050405_LIMA1,ENSG00000050426_LETMD1,ENSG00000050438_SLC4A8,ENSG00000050730_TNIP3,ENSG00000050748_MAPK9,ENSG00000050767_COL23A1,ENSG00000051009_FAM160A2,ENSG00000051108_HERPUD1,ENSG00000051128_HOMER3,ENSG00000051180_RAD51,ENSG00000051341_POLQ,ENSG00000051382_PIK3CB,ENSG00000051523_CYBA,ENSG00000051596_THOC3,ENSG00000051620_HEBP2,ENSG00000051825_MPHOSPH9,ENSG00000052126_PLEKHA5,ENSG00000052723_SIKE1,ENSG00000052749_RRP12,ENSG00000052795_FNIP2,ENSG00000052802_MSMO1,ENSG00000052841_TTC17,ENSG00000053108_FSTL4,ENSG00000053254_FOXN3,ENSG00000053371_AKR7A2,ENSG00000053372_MRTO4,ENSG00000053501_USE1,ENSG00000053524_MCF2L2,ENSG00000053770_AP5M1,ENSG00000053900_ANAPC4,ENSG00000053918_KCNQ1,ENSG00000054116_TRAPPC3,ENSG00000054118_THRAP3,ENSG00000054148_PHPT1,ENSG00000054219_LY75,ENSG00000054267_ARID4B,ENSG00000054277_OPN3,ENSG00000054282_SDCCAG8,ENSG00000054392_HHAT,ENSG00000054523_KIF1B,ENSG00000054611_TBC1D22A,ENSG00000054654_SYNE2,ENSG00000054793_ATP9A,ENSG00000054965_FAM168A,ENSG00000054967_RELT,ENSG00000054983_GALC,ENSG00000055044_NOP58,ENSG00000055070_SZRD1,ENSG00000055118_KCNH2,ENSG00000055130_CUL1,ENSG00000055147_FAM114A2,ENSG00000055163_CYFIP2,ENSG00000055208_TAB2,ENSG00000055211_GINM1,ENSG00000055332_EIF2AK2,ENSG00000055483_USP36,ENSG00000055609_KMT2C,ENSG00000055917_PUM2,ENSG00000055950_MRPL43,ENSG00000056050_HPF1,ENSG00000056097_ZFR,ENSG00000056277_ZNF280C,ENSG00000056558_TRAF1,ENSG00000056586_RC3H2,ENSG00000056972_TRAF3IP2,ENSG00000057019_DCBLD2,ENSG00000057252_SOAT1,ENSG00000057294_PKP2,ENSG00000057468_MSH4,ENSG00000057608_GDI2,ENSG00000057657_PRDM1,ENSG00000057663_ATG5,ENSG00000057704_TMCC3,ENSG00000057757_PITHD1,ENSG00000057935_MTA3,ENSG00000058056_USP13,ENSG00000058063_ATP11B,ENSG00000058091_CDK14,ENSG00000058262_SEC61A1,ENSG00000058272_PPP1R12A,ENSG00000058453_CROCC,ENSG00000058600_POLR3E,ENSG00000058668_ATP2B4,ENSG00000058673_ZC3H11A,ENSG00000058729_RIOK2,ENSG00000058799_YIPF1,ENSG00000058804_NDC1,ENSG00000058866_DGKG,ENSG00000059122_FLYWCH1,ENSG00000059145_UNKL,ENSG00000059377_TBXAS1,ENSG00000059378_PARP12,ENSG00000059573_ALDH18A1,ENSG00000059588_TARBP1,ENSG00000059691_GATB,ENSG00000059728_MXD1,ENSG00000059758_CDK17,ENSG00000059769_DNAJC25,ENSG00000059804_SLC2A3,ENSG00000060069_CTDP1,ENSG00000060138_YBX3,ENSG00000060140_STYK1,ENSG00000060237_WNK1,ENSG00000060339_CCAR1,ENSG00000060491_OGFR,ENSG00000060558_GNA15,ENSG00000060642_PIGV,ENSG00000060688_SNRNP40,ENSG00000060749_QSER1,ENSG00000060762_MPC1,ENSG00000060971_ACAA1,ENSG00000060982_BCAT1,ENSG00000061273_HDAC7,ENSG00000061676_NCKAP1,ENSG00000061794_MRPS35,ENSG00000061918_GUCY1B3,ENSG00000061936_SFSWAP,ENSG00000061938_TNK2,ENSG00000061987_MON2,ENSG00000062194_GPBP1,ENSG00000062282_DGAT2,ENSG00000062485_CS,ENSG00000062598_ELMO2,ENSG00000062650_WAPL,ENSG00000062716_VMP1,ENSG00000062725_APPBP2,ENSG00000062822_POLD1,ENSG00000063046_EIF4B,ENSG00000063127_SLC6A16,ENSG00000063169_GLTSCR1,ENSG00000063176_SPHK2,ENSG00000063177_RPL18,ENSG00000063241_ISOC2,ENSG00000063244_U2AF2,ENSG00000063245_EPN1,ENSG00000063322_MED29,ENSG00000063587_ZNF275,ENSG00000063601_MTMR1,ENSG00000063761_ADCK1,ENSG00000063854_HAGH,ENSG00000063978_RNF4,ENSG00000064012_CASP8,ENSG00000064102_ASUN,ENSG00000064115_TM7SF3,ENSG00000064199_SPA17,ENSG00000064201_TSPAN32,ENSG00000064225_ST3GAL6,ENSG00000064270_ATP2C2,ENSG00000064313_TAF2,ENSG00000064393_HIPK2,ENSG00000064419_TNPO3,ENSG00000064490_RFXANK,ENSG00000064545_TMEM161A,ENSG00000064547_LPAR2,ENSG00000064601_CTSA,ENSG00000064607_SUGP2,ENSG00000064651_SLC12A2,ENSG00000064652_SNX24,ENSG00000064666_CNN2,ENSG00000064687_ABCA7,ENSG00000064703_DDX20,ENSG00000064726_BTBD1,ENSG00000064763_FAR2,ENSG00000064886_CHI3L2,ENSG00000064932_SBNO2,ENSG00000064933_PMS1,ENSG00000064961_HMG20B,ENSG00000064989_CALCRL,ENSG00000064995_TAF11,ENSG00000064999_ANKS1A,ENSG00000065000_AP3D1,ENSG00000065029_ZNF76,ENSG00000065057_NTHL1,ENSG00000065060_UHRF1BP1,ENSG00000065135_GNAI3,ENSG00000065150_IPO5,ENSG00000065154_OAT,ENSG00000065183_WDR3,ENSG00000065243_PKN2,ENSG00000065268_WDR18,ENSG00000065308_TRAM2,ENSG00000065328_MCM10,ENSG00000065357_DGKA,ENSG00000065413_ANKRD44,ENSG00000065427_KARS,ENSG00000065457_ADAT1,ENSG00000065485_PDIA5,ENSG00000065491_TBC1D22B,ENSG00000065518_NDUFB4,ENSG00000065526_SPEN,ENSG00000065534_MYLK,ENSG00000065548_ZC3H15,ENSG00000065559_MAP2K4,ENSG00000065600_TMEM206,ENSG00000065613_SLK,ENSG00000065615_CYB5R4,ENSG00000065618_COL17A1,ENSG00000065621_GSTO2,ENSG00000065665_SEC61A2,ENSG00000065675_PRKCQ,ENSG00000065802_ASB1,ENSG00000065809_FAM107B,ENSG00000065833_ME1,ENSG00000065882_TBC1D1,ENSG00000065883_CDK13,ENSG00000065911_MTHFD2,ENSG00000065923_SLC9A7,ENSG00000065970_FOXJ2,ENSG00000065978_YBX1,ENSG00000065989_PDE4A,ENSG00000066027_PPP2R5A,ENSG00000066044_ELAVL1,ENSG00000066084_DIP2B,ENSG00000066117_SMARCD1,ENSG00000066135_KDM4A,ENSG00000066136_NFYC,ENSG00000066279_ASPM,ENSG00000066294_CD84,ENSG00000066322_ELOVL1,ENSG00000066336_SPI1,ENSG00000066379_ZNRD1,ENSG00000066422_ZBTB11,ENSG00000066427_ATXN3,ENSG00000066455_GOLGA5,ENSG00000066557_LRRC40,ENSG00000066583_ISOC1,ENSG00000066651_TRMT11,ENSG00000066654_THUMPD1,ENSG00000066697_MSANTD3,ENSG00000066739_ATG2B,ENSG00000066777_ARFGEF1,ENSG00000066827_ZFAT,ENSG00000066855_MTFR1,ENSG00000066923_STAG3,ENSG00000066926_FECH,ENSG00000066933_MYO9A,ENSG00000067048_DDX3Y,ENSG00000067057_PFKP,ENSG00000067064_IDI1,ENSG00000067066_SP100,ENSG00000067082_KLF6,ENSG00000067113_PLPP1,ENSG00000067141_NEO1,ENSG00000067167_TRAM1,ENSG00000067182_TNFRSF1A,ENSG00000067191_CACNB1,ENSG00000067208_EVI5,ENSG00000067221_STOML1,ENSG00000067225_PKM,ENSG00000067248_DHX29,ENSG00000067334_DNTTIP2,ENSG00000067365_METTL22,ENSG00000067369_TP53BP1,ENSG00000067533_RRP15,ENSG00000067560_RHOA,ENSG00000067596_DHX8,ENSG00000067606_PRKCZ,ENSG00000067646_ZFY,ENSG00000067704_IARS2,ENSG00000067798_NAV3,ENSG00000067829_IDH3G,ENSG00000067836_ROGDI,ENSG00000067840_PDZD4,ENSG00000067900_ROCK1,ENSG00000067955_CBFB,ENSG00000067992_PDK3,ENSG00000068001_HYAL2,ENSG00000068024_HDAC4,ENSG00000068028_RASSF1,ENSG00000068079_IFI35,ENSG00000068097_HEATR6,ENSG00000068120_COASY,ENSG00000068305_MEF2A,ENSG00000068308_OTUD5,ENSG00000068323_TFE3,ENSG00000068354_TBC1D25,ENSG00000068366_ACSL4,ENSG00000068383_INPP5A,ENSG00000068394_GPKOW,ENSG00000068400_GRIPAP1,ENSG00000068438_FTSJ1,ENSG00000068489_PRR11,ENSG00000068650_ATP11A,ENSG00000068654_POLR1A,ENSG00000068697_LAPTM4A,ENSG00000068724_TTC7A,ENSG00000068745_IP6K2,ENSG00000068784_SRBD1,ENSG00000068796_KIF2A,ENSG00000068831_RASGRP2,ENSG00000068878_PSME4,ENSG00000068885_IFT80,ENSG00000068903_SIRT2,ENSG00000068912_ERLEC1,ENSG00000068971_PPP2R5B,ENSG00000068976_PYGM,ENSG00000069020_MAST4,ENSG00000069248_NUP133,ENSG00000069275_NUCKS1,ENSG00000069329_VPS35,ENSG00000069345_DNAJA2,ENSG00000069399_BCL3,ENSG00000069424_KCNAB2,ENSG00000069493_CLEC2D,ENSG00000069509_FUNDC1,ENSG00000069667_RORA,ENSG00000069702_TGFBR3,ENSG00000069849_ATP1B3,ENSG00000069869_NEDD4,ENSG00000069943_PIGB,ENSG00000069956_MAPK6,ENSG00000069966_GNB5,ENSG00000069974_RAB27A,ENSG00000069998_CECR5,ENSG00000070010_UFD1L,ENSG00000070018_LRP6,ENSG00000070047_PHRF1,ENSG00000070061_IKBKAP,ENSG00000070081_NUCB2,ENSG00000070087_PFN2,ENSG00000070182_SPTB,ENSG00000070190_DAPP1,ENSG00000070214_SLC44A1,ENSG00000070269_TMEM260,ENSG00000070366_SMG6,ENSG00000070367_EXOC5,ENSG00000070371_CLTCL1,ENSG00000070404_FSTL3,ENSG00000070413_DGCR2,ENSG00000070423_RNF126,ENSG00000070444_MNT,ENSG00000070476_ZXDC,ENSG00000070495_JMJD6,ENSG00000070501_POLB,ENSG00000070540_WIPI1,ENSG00000070610_GBA2,ENSG00000070614_NDST1,ENSG00000070669_ASNS,ENSG00000070718_AP3M2,ENSG00000070731_ST6GALNAC2,ENSG00000070756_PABPC1,ENSG00000070759_TESK2,ENSG00000070761_CFAP20,ENSG00000070770_CSNK2A2,ENSG00000070785_EIF2B3,ENSG00000070814_TCOF1,ENSG00000070831_CDC42,ENSG00000070882_OSBPL3,ENSG00000070950_RAD18,ENSG00000070961_ATP2B1,ENSG00000071051_NCK2,ENSG00000071054_MAP4K4,ENSG00000071073_MGAT4A,ENSG00000071082_RPL31,ENSG00000071127_WDR1,ENSG00000071189_SNX13,ENSG00000071205_ARHGAP10,ENSG00000071242_RPS6KA2,ENSG00000071243_ING3,ENSG00000071246_VASH1,ENSG00000071462_WBSCR22,ENSG00000071537_SEL1L,ENSG00000071539_TRIP13,ENSG00000071553_ATP6AP1,ENSG00000071564_TCF3,ENSG00000071575_TRIB2,ENSG00000071626_DAZAP1,ENSG00000071655_MBD3,ENSG00000071794_HLTF,ENSG00000071859_FAM50A,ENSG00000071889_FAM3A,ENSG00000071894_CPSF1,ENSG00000071967_CYBRD1,ENSG00000071994_PDCD2,ENSG00000072042_RDH11,ENSG00000072062_PRKACA,ENSG00000072071_ADGRL1,ENSG00000072110_ACTN1,ENSG00000072121_ZFYVE26,ENSG00000072134_EPN2,ENSG00000072135_PTPN18,ENSG00000072210_ALDH3A2,ENSG00000072274_TFRC,ENSG00000072310_SREBF1,ENSG00000072364_AFF4,ENSG00000072401_UBE2D1,ENSG00000072415_MPP5,ENSG00000072422_RHOBTB1,ENSG00000072501_SMC1A,ENSG00000072506_HSD17B10,ENSG00000072518_MARK2,ENSG00000072571_HMMR,ENSG00000072609_CHFR,ENSG00000072657_TRHDE,ENSG00000072682_P4HA2,ENSG00000072694_FCGR2B,ENSG00000072736_NFATC3,ENSG00000072756_TRNT1,ENSG00000072778_ACADVL,ENSG00000072786_STK10,ENSG00000072803_FBXW11,ENSG00000072818_ACAP1,ENSG00000072849_DERL2,ENSG00000072858_SIDT1,ENSG00000072864_NDE1,ENSG00000072952_MRVI1,ENSG00000072954_TMEM38A,ENSG00000072958_AP1M1,ENSG00000073008_PVR,ENSG00000073050_XRCC1,ENSG00000073060_SCARB1,ENSG00000073111_MCM2,ENSG00000073150_PANX2,ENSG00000073169_SELENOO,ENSG00000073331_ALPK1,ENSG00000073350_LLGL2,ENSG00000073417_PDE8A,ENSG00000073464_CLCN4,ENSG00000073536_NLE1,ENSG00000073578_SDHA,ENSG00000073584_SMARCE1,ENSG00000073605_GSDMB,ENSG00000073614_KDM5A,ENSG00000073737_DHRS9,ENSG00000073756_PTGS2,ENSG00000073792_IGF2BP2,ENSG00000073803_MAP3K13,ENSG00000073849_ST6GAL1,ENSG00000073861_TBX21,ENSG00000073910_FRY,ENSG00000073921_PICALM,ENSG00000073969_NSF,ENSG00000074054_CLASP1,ENSG00000074071_MRPS34,ENSG00000074201_CLNS1A,ENSG00000074266_EED,ENSG00000074276_CDHR2,ENSG00000074319_TSG101,ENSG00000074356_NCBP3,ENSG00000074370_ATP2A3,ENSG00000074416_MGLL,ENSG00000074582_BCS1L,ENSG00000074603_DPP8,ENSG00000074621_SLC24A1,ENSG00000074657_ZNF532,ENSG00000074660_SCARF1,ENSG00000074695_LMAN1,ENSG00000074696_HACD3,ENSG00000074706_IPCEF1,ENSG00000074755_ZZEF1,ENSG00000074800_ENO1,ENSG00000074842_MYDGF,ENSG00000074855_ANO8,ENSG00000074935_TUBE1,ENSG00000074964_ARHGEF10L,ENSG00000074966_TXK,ENSG00000075089_ACTR6,ENSG00000075131_TIPIN,ENSG00000075142_SRI,ENSG00000075151_EIF4G3,ENSG00000075188_NUP37,ENSG00000075218_GTSE1,ENSG00000075223_SEMA3C,ENSG00000075234_TTC38,ENSG00000075239_ACAT1,ENSG00000075240_GRAMD4,ENSG00000075275_CELSR1,ENSG00000075292_ZNF638,ENSG00000075303_SLC25A40,ENSG00000075336_TIMM21,ENSG00000075340_ADD2,ENSG00000075391_RASAL2,ENSG00000075399_VPS9D1,ENSG00000075407_ZNF37A,ENSG00000075413_MARK3,ENSG00000075415_SLC25A3,ENSG00000075420_FNDC3B,ENSG00000075426_FOSL2,ENSG00000075539_FRYL,ENSG00000075568_TMEM131,ENSG00000075624_ACTB,ENSG00000075651_PLD1,ENSG00000075702_WDR62,ENSG00000075711_DLG1,ENSG00000075785_RAB7A,ENSG00000075790_BCAP29,ENSG00000075826_SEC31B,ENSG00000075856_SART3,ENSG00000075884_ARHGAP15,ENSG00000075914_EXOSC7,ENSG00000075945_KIFAP3,ENSG00000075975_MKRN2,ENSG00000076003_MCM6,ENSG00000076043_REXO2,ENSG00000076053_RBM7,ENSG00000076067_RBMS2,ENSG00000076108_BAZ2A,ENSG00000076201_PTPN23,ENSG00000076242_MLH1,ENSG00000076248_UNG,ENSG00000076258_FMO4,ENSG00000076321_KLHL20,ENSG00000076351_SLC46A1,ENSG00000076356_PLXNA2,ENSG00000076382_SPAG5,ENSG00000076513_ANKRD13A,ENSG00000076554_TPD52,ENSG00000076555_ACACB,ENSG00000076604_TRAF4,ENSG00000076641_PAG1,ENSG00000076650_GPATCH1,ENSG00000076662_ICAM3,ENSG00000076685_NT5C2,ENSG00000076770_MBNL3,ENSG00000076864_RAP1GAP,ENSG00000076924_XAB2,ENSG00000076928_ARHGEF1,ENSG00000076944_STXBP2,ENSG00000076984_MAP2K7,ENSG00000077044_DGKD,ENSG00000077097_TOP2B,ENSG00000077147_TM9SF3,ENSG00000077150_NFKB2,ENSG00000077152_UBE2T,ENSG00000077157_PPP1R12B,ENSG00000077232_DNAJC10,ENSG00000077235_GTF3C1,ENSG00000077238_IL4R,ENSG00000077254_USP33,ENSG00000077312_SNRPA,ENSG00000077348_EXOSC5,ENSG00000077380_DYNC1I2,ENSG00000077420_APBB1IP,ENSG00000077454_LRCH4,ENSG00000077458_FAM76B,ENSG00000077463_SIRT6,ENSG00000077514_POLD3,ENSG00000077549_CAPZB,ENSG00000077585_GPR137B,ENSG00000077684_JADE1,ENSG00000077713_SLC25A43,ENSG00000077721_UBE2A,ENSG00000077782_FGFR1,ENSG00000077984_CST7,ENSG00000078043_PIAS2,ENSG00000078053_AMPH,ENSG00000078061_ARAF,ENSG00000078070_MCCC1,ENSG00000078114_NEBL,ENSG00000078124_ACER3,ENSG00000078140_UBE2K,ENSG00000078142_PIK3C3,ENSG00000078177_N4BP2,ENSG00000078237_TIGAR,ENSG00000078246_TULP3,ENSG00000078269_SYNJ2,ENSG00000078304_PPP2R5C,ENSG00000078369_GNB1,ENSG00000078403_MLLT10,ENSG00000078487_ZCWPW1,ENSG00000078589_P2RY10,ENSG00000078596_ITM2A,ENSG00000078618_NRDC,ENSG00000078668_VDAC3,ENSG00000078674_PCM1,ENSG00000078687_TNRC6C,ENSG00000078699_CBFA2T2,ENSG00000078747_ITCH,ENSG00000078804_TP53INP2,ENSG00000078808_SDF4,ENSG00000078902_TOLLIP,ENSG00000078967_UBE2D4,ENSG00000079134_THOC1,ENSG00000079215_SLC1A3,ENSG00000079246_XRCC5,ENSG00000079257_LXN,ENSG00000079263_SP140,ENSG00000079277_MKNK1,ENSG00000079308_TNS1,ENSG00000079313_REXO1,ENSG00000079332_SAR1A,ENSG00000079335_CDC14A,ENSG00000079385_CEACAM1,ENSG00000079387_SENP1,ENSG00000079393_DUSP13,ENSG00000079432_CIC,ENSG00000079435_LIPE,ENSG00000079459_FDFT1,ENSG00000079462_PAFAH1B3,ENSG00000079482_OPHN1,ENSG00000079616_KIF22,ENSG00000079691_CARMIL1,ENSG00000079739_PGM1,ENSG00000079785_DDX1,ENSG00000079805_DNM2,ENSG00000079819_EPB41L2,ENSG00000079950_STX7,ENSG00000079999_KEAP1,ENSG00000080189_SLC35C2,ENSG00000080200_CRYBG3,ENSG00000080298_RFX3,ENSG00000080345_RIF1,ENSG00000080371_RAB21,ENSG00000080493_SLC4A4,ENSG00000080503_SMARCA2,ENSG00000080546_SESN1,ENSG00000080561_MID2,ENSG00000080573_COL5A3,ENSG00000080603_SRCAP,ENSG00000080608_PUM3,ENSG00000080802_CNOT4,ENSG00000080815_PSEN1,ENSG00000080819_CPOX,ENSG00000080822_CLDND1,ENSG00000080824_HSP90AA1,ENSG00000080839_RBL1,ENSG00000080845_DLGAP4,ENSG00000080986_NDC80,ENSG00000081014_AP4E1,ENSG00000081019_RSBN1,ENSG00000081026_MAGI3,ENSG00000081052_COL4A4,ENSG00000081059_TCF7,ENSG00000081087_OSTM1,ENSG00000081148_IMPG2,ENSG00000081154_PCNP,ENSG00000081177_EXD2,ENSG00000081181_ARG2,ENSG00000081189_MEF2C,ENSG00000081237_PTPRC,ENSG00000081307_UBA5,ENSG00000081320_STK17B,ENSG00000081377_CDC14B,ENSG00000081386_ZNF510,ENSG00000081665_ZNF506,ENSG00000081692_JMJD4,ENSG00000081721_DUSP12,ENSG00000081760_AACS,ENSG00000081791_KIAA0141,ENSG00000081870_HSPB11,ENSG00000081913_PHLPP1,ENSG00000081985_IL12RB2,ENSG00000082014_SMARCD3,ENSG00000082068_WDR70,ENSG00000082074_FYB,ENSG00000082146_STRADB,ENSG00000082153_BZW1,ENSG00000082196_C1QTNF3,ENSG00000082212_ME2,ENSG00000082213_C5orf22,ENSG00000082258_CCNT2,ENSG00000082269_FAM135A,ENSG00000082293_COL19A1,ENSG00000082397_EPB41L3,ENSG00000082438_COBLL1,ENSG00000082458_DLG3,ENSG00000082512_TRAF5,ENSG00000082515_MRPL22,ENSG00000082516_GEMIN5,ENSG00000082641_NFE2L1,ENSG00000082701_GSK3B,ENSG00000082781_ITGB5,ENSG00000082805_ERC1,ENSG00000082898_XPO1,ENSG00000082996_RNF13,ENSG00000083093_PALB2,ENSG00000083097_DOPEY1,ENSG00000083099_LYRM2,ENSG00000083123_BCKDHB,ENSG00000083168_KAT6A,ENSG00000083223_ZCCHC6,ENSG00000083290_ULK2,ENSG00000083312_TNPO1,ENSG00000083444_PLOD1,ENSG00000083454_P2RX5,ENSG00000083457_ITGAE,ENSG00000083520_DIS3,ENSG00000083535_PIBF1,ENSG00000083544_TDRD3,ENSG00000083635_NUFIP1,ENSG00000083642_PDS5B,ENSG00000083720_OXCT1,ENSG00000083750_RRAGB,ENSG00000083799_CYLD,ENSG00000083807_SLC27A5,ENSG00000083812_ZNF324,ENSG00000083814_ZNF671,ENSG00000083817_ZNF416,ENSG00000083828_ZNF586,ENSG00000083838_ZNF446,ENSG00000083844_ZNF264,ENSG00000083845_RPS5,ENSG00000083857_FAT1,ENSG00000083896_YTHDC1,ENSG00000083937_CHMP2B,ENSG00000084070_SMAP2,ENSG00000084072_PPIE,ENSG00000084073_ZMPSTE24,ENSG00000084090_STARD7,ENSG00000084092_NOA1,ENSG00000084093_REST,ENSG00000084110_HAL,ENSG00000084112_SSH1,ENSG00000084207_GSTP1,ENSG00000084234_APLP2,ENSG00000084444_FAM234B,ENSG00000084463_WBP11,ENSG00000084623_EIF3I,ENSG00000084652_TXLNA,ENSG00000084676_NCOA1,ENSG00000084693_AGBL5,ENSG00000084731_KIF3C,ENSG00000084733_RAB10,ENSG00000084754_HADHA,ENSG00000084764_MAPRE3,ENSG00000084774_CAD,ENSG00000085063_CD59,ENSG00000085117_CD82,ENSG00000085185_BCORL1,ENSG00000085224_ATRX,ENSG00000085231_AK6,ENSG00000085265_FCN1,ENSG00000085274_MYNN,ENSG00000085276_MECOM,ENSG00000085365_SCAMP1,ENSG00000085377_PREP,ENSG00000085382_HACE1,ENSG00000085415_SEH1L,ENSG00000085433_WDR47,ENSG00000085449_WDFY1,ENSG00000085491_SLC25A24,ENSG00000085511_MAP3K4,ENSG00000085514_PILRA,ENSG00000085563_ABCB1,ENSG00000085644_ZNF213,ENSG00000085662_AKR1B1,ENSG00000085719_CPNE3,ENSG00000085721_RRN3,ENSG00000085733_CTTN,ENSG00000085760_MTIF2,ENSG00000085788_DDHD2,ENSG00000085831_TTC39A,ENSG00000085832_EPS15,ENSG00000085840_ORC1,ENSG00000085871_MGST2,ENSG00000085872_CHERP,ENSG00000085978_ATG16L1,ENSG00000085982_USP40,ENSG00000085998_POMGNT1,ENSG00000086015_MAST2,ENSG00000086061_DNAJA1,ENSG00000086062_B4GALT1,ENSG00000086065_CHMP5,ENSG00000086102_NFX1,ENSG00000086189_DIMT1,ENSG00000086200_IPO11,ENSG00000086232_EIF2AK1,ENSG00000086288_NME8,ENSG00000086289_EPDR1,ENSG00000086300_SNX10,ENSG00000086475_SEPHS1,ENSG00000086504_MRPL28,ENSG00000086506_HBQ1,ENSG00000086544_ITPKC,ENSG00000086548_CEACAM6,ENSG00000086589_RBM22,ENSG00000086598_TMED2,ENSG00000086619_ERO1B,ENSG00000086666_ZFAND6,ENSG00000086712_TXLNG,ENSG00000086717_PPEF1,ENSG00000086730_LAT2,ENSG00000086758_HUWE1,ENSG00000086827_ZW10,ENSG00000086848_ALG9,ENSG00000087008_ACOX3,ENSG00000087053_MTMR2,ENSG00000087074_PPP1R15A,ENSG00000087077_TRIP6,ENSG00000087085_ACHE,ENSG00000087086_FTL,ENSG00000087087_SRRT,ENSG00000087088_BAX,ENSG00000087095_NLK,ENSG00000087111_PIGS,ENSG00000087116_ADAMTS2,ENSG00000087152_ATXN7L3,ENSG00000087157_PGS1,ENSG00000087191_PSMC5,ENSG00000087206_UIMC1,ENSG00000087237_CETP,ENSG00000087253_LPCAT2,ENSG00000087263_OGFOD1,ENSG00000087266_SH3BP2,ENSG00000087269_NOP14,ENSG00000087274_ADD1,ENSG00000087299_L2HGDH,ENSG00000087301_TXNDC16,ENSG00000087302_C14orf166,ENSG00000087338_GMCL1,ENSG00000087365_SF3B2,ENSG00000087448_KLHL42,ENSG00000087460_GNAS,ENSG00000087470_DNM1L,ENSG00000087502_ERGIC2,ENSG00000087586_AURKA,ENSG00000087589_CASS4,ENSG00000087884_AAMDC,ENSG00000087903_RFX2,ENSG00000087995_METTL2A,ENSG00000088035_ALG6,ENSG00000088038_CNOT3,ENSG00000088053_GP6,ENSG00000088179_PTPN4,ENSG00000088205_DDX18,ENSG00000088247_KHSRP,ENSG00000088256_GNA11,ENSG00000088298_EDEM2,ENSG00000088325_TPX2,ENSG00000088356_PDRG1,ENSG00000088387_DOCK9,ENSG00000088448_ANKRD10,ENSG00000088451_TGDS,ENSG00000088538_DOCK3,ENSG00000088543_C3orf18,ENSG00000088682_COQ9,ENSG00000088726_TMEM40,ENSG00000088727_KIF9,ENSG00000088766_CRLS1,ENSG00000088808_PPP1R13B,ENSG00000088812_ATRN,ENSG00000088826_SMOX,ENSG00000088827_SIGLEC1,ENSG00000088832_FKBP1A,ENSG00000088833_NSFL1C,ENSG00000088854_C20orf194,ENSG00000088876_ZNF343,ENSG00000088888_MAVS,ENSG00000088930_XRN2,ENSG00000088970_KIZ,ENSG00000088986_DYNLL1,ENSG00000088992_TESC,ENSG00000089006_SNX5,ENSG00000089009_RPL6,ENSG00000089012_SIRPG,ENSG00000089022_MAPKAPK5,ENSG00000089041_P2RX7,ENSG00000089048_ESF1,ENSG00000089050_RBBP9,ENSG00000089053_ANAPC5,ENSG00000089057_SLC23A2,ENSG00000089060_SLC8B1,ENSG00000089063_TMEM230,ENSG00000089091_DZANK1,ENSG00000089094_KDM2B,ENSG00000089123_TASP1,ENSG00000089127_OAS1,ENSG00000089154_GCN1,ENSG00000089157_RPLP0,ENSG00000089159_PXN,ENSG00000089177_KIF16B,ENSG00000089195_TRMT6,ENSG00000089220_PEBP1,ENSG00000089234_BRAP,ENSG00000089248_ERP29,ENSG00000089280_FUS,ENSG00000089289_IGBP1,ENSG00000089327_FXYD5,ENSG00000089335_ZNF302,ENSG00000089351_GRAMD1A,ENSG00000089472_HEPH,ENSG00000089486_CDIP1,ENSG00000089505_CMTM1,ENSG00000089597_GANAB,ENSG00000089639_GMIP,ENSG00000089682_RBM41,ENSG00000089685_BIRC5,ENSG00000089693_MLF2,ENSG00000089737_DDX24,ENSG00000089775_ZBTB25,ENSG00000089818_NECAP1,ENSG00000089820_ARHGAP4,ENSG00000089876_DHX32,ENSG00000089902_RCOR1,ENSG00000089916_GPATCH2L,ENSG00000090006_LTBP4,ENSG00000090013_BLVRB,ENSG00000090020_SLC9A1,ENSG00000090054_SPTLC1,ENSG00000090060_PAPOLA,ENSG00000090061_CCNK,ENSG00000090097_PCBP4,ENSG00000090104_RGS1,ENSG00000090238_YPEL3,ENSG00000090263_MRPS33,ENSG00000090266_NDUFB2,ENSG00000090273_NUDC,ENSG00000090316_MAEA,ENSG00000090339_ICAM1,ENSG00000090372_STRN4,ENSG00000090376_IRAK3,ENSG00000090382_LYZ,ENSG00000090432_MUL1,ENSG00000090447_TFAP4,ENSG00000090470_PDCD7,ENSG00000090487_SPG21,ENSG00000090520_DNAJB11,ENSG00000090565_RAB11FIP3,ENSG00000090581_GNPTG,ENSG00000090612_ZNF268,ENSG00000090615_GOLGA3,ENSG00000090621_PABPC4,ENSG00000090661_CERS4,ENSG00000090674_MCOLN1,ENSG00000090686_USP48,ENSG00000090776_EFNB1,ENSG00000090857_PDPR,ENSG00000090861_AARS,ENSG00000090863_GLG1,ENSG00000090889_KIF4A,ENSG00000090905_TNRC6A,ENSG00000090924_PLEKHG2,ENSG00000090975_PITPNM2,ENSG00000090989_EXOC1,ENSG00000091009_RBM27,ENSG00000091039_OSBPL8,ENSG00000091073_DTX2,ENSG00000091106_NLRC4,ENSG00000091127_PUS7,ENSG00000091140_DLD,ENSG00000091157_WDR7,ENSG00000091164_TXNL1,ENSG00000091181_IL5RA,ENSG00000091262_ABCC6,ENSG00000091317_CMTM6,ENSG00000091409_ITGA6,ENSG00000091436_AC013461.1,ENSG00000091483_FH,ENSG00000091490_SEL1L3,ENSG00000091527_CDV3,ENSG00000091542_ALKBH5,ENSG00000091592_NLRP1,ENSG00000091640_SPAG7,ENSG00000091651_ORC6,ENSG00000091732_ZC3HC1,ENSG00000091831_ESR1,ENSG00000091947_TMEM101,ENSG00000091972_CD200,ENSG00000092010_PSME1,ENSG00000092020_PPP2R3C,ENSG00000092036_HAUS4,ENSG00000092067_CEBPE,ENSG00000092094_OSGEP,ENSG00000092098_RNF31,ENSG00000092108_SCFD1,ENSG00000092140_G2E3,ENSG00000092148_HECTD1,ENSG00000092199_HNRNPC,ENSG00000092200_RPGRIP1,ENSG00000092201_SUPT16H,ENSG00000092203_TOX4,ENSG00000092208_GEMIN2,ENSG00000092330_TINF2,ENSG00000092439_TRPM7,ENSG00000092470_WDR76,ENSG00000092529_CAPN3,ENSG00000092531_SNAP23,ENSG00000092621_PHGDH,ENSG00000092758_COL9A3,ENSG00000092820_EZR,ENSG00000092841_MYL6,ENSG00000092847_AGO1,ENSG00000092853_CLSPN,ENSG00000092871_RFFL,ENSG00000092929_UNC13D,ENSG00000092931_MFSD11,ENSG00000092964_DPYSL2,ENSG00000092978_GPATCH2,ENSG00000093000_NUP50,ENSG00000093009_CDC45,ENSG00000093010_COMT,ENSG00000093072_CECR1,ENSG00000093134_VNN3,ENSG00000093144_ECHDC1,ENSG00000093167_LRRFIP2,ENSG00000093183_SEC22C,ENSG00000093217_XYLB,ENSG00000094631_HDAC6,ENSG00000094804_CDC6,ENSG00000094841_UPRT,ENSG00000094880_CDC23,ENSG00000094914_AAAS,ENSG00000094916_CBX5,ENSG00000094975_SUCO,ENSG00000095002_MSH2,ENSG00000095015_MAP3K1,ENSG00000095059_DHPS,ENSG00000095066_HOOK2,ENSG00000095139_ARCN1,ENSG00000095209_TMEM38B,ENSG00000095261_PSMD5,ENSG00000095303_PTGS1,ENSG00000095319_NUP188,ENSG00000095321_CRAT,ENSG00000095370_SH2D3C,ENSG00000095380_NANS,ENSG00000095383_TBC1D2,ENSG00000095485_CWF19L1,ENSG00000095564_BTAF1,ENSG00000095574_IKZF5,ENSG00000095585_BLNK,ENSG00000095637_SORBS1,ENSG00000095739_BAMBI,ENSG00000095787_WAC,ENSG00000095794_CREM,ENSG00000095906_NUBP2,ENSG00000095932_SMIM24,ENSG00000095951_HIVEP1,ENSG00000096006_CRISP3,ENSG00000096060_FKBP5,ENSG00000096063_SRPK1,ENSG00000096070_BRPF3,ENSG00000096080_MRPS18A,ENSG00000096092_TMEM14A,ENSG00000096093_EFHC1,ENSG00000096384_HSP90AB1,ENSG00000096401_CDC5L,ENSG00000096433_ITPR3,ENSG00000096654_ZNF184,ENSG00000096696_DSP,ENSG00000096717_SIRT1,ENSG00000096746_HNRNPH3,ENSG00000096872_IFT74,ENSG00000096968_JAK2,ENSG00000096996_IL12RB1,ENSG00000097007_ABL1,ENSG00000097021_ACOT7,ENSG00000097033_SH3GLB1,ENSG00000097046_CDC7,ENSG00000097096_SYDE2,ENSG00000099139_PCSK5,ENSG00000099194_SCD,ENSG00000099203_TMED1,ENSG00000099204_ABLIM1,ENSG00000099219_ERMP1,ENSG00000099246_RAB18,ENSG00000099250_NRP1,ENSG00000099256_PRTFDC1,ENSG00000099290_FAM21A,ENSG00000099308_MAST3,ENSG00000099326_MZF1,ENSG00000099330_OCEL1,ENSG00000099331_MYO9B,ENSG00000099337_KCNK6,ENSG00000099338_CATSPERG,ENSG00000099341_PSMD8,ENSG00000099364_FBXL19,ENSG00000099377_HSD3B7,ENSG00000099381_SETD1A,ENSG00000099385_BCL7C,ENSG00000099622_CIRBP,ENSG00000099624_ATP5D,ENSG00000099783_HNRNPM,ENSG00000099785_MARCH2,ENSG00000099795_NDUFB7,ENSG00000099797_TECR,ENSG00000099800_TIMM13,ENSG00000099804_CDC34,ENSG00000099810_MTAP,ENSG00000099817_POLR2E,ENSG00000099821_POLRMT,ENSG00000099840_IZUMO4,ENSG00000099849_RASSF7,ENSG00000099860_GADD45B,ENSG00000099875_MKNK2,ENSG00000099889_ARVCF,ENSG00000099899_TRMT2A,ENSG00000099901_RANBP1,ENSG00000099904_ZDHHC8,ENSG00000099910_KLHL22,ENSG00000099917_MED15,ENSG00000099940_SNAP29,ENSG00000099942_CRKL,ENSG00000099949_LZTR1,ENSG00000099956_SMARCB1,ENSG00000099958_DERL3,ENSG00000099968_BCL2L13,ENSG00000099977_DDT,ENSG00000099985_OSM,ENSG00000099991_CABIN1,ENSG00000099992_TBC1D10A,ENSG00000099995_SF3A1,ENSG00000099998_GGT5,ENSG00000099999_RNF215,ENSG00000100003_SEC14L2,ENSG00000100014_SPECC1L,ENSG00000100023_PPIL2,ENSG00000100024_UPB1,ENSG00000100027_YPEL1,ENSG00000100028_SNRPD3,ENSG00000100029_PES1,ENSG00000100030_MAPK1,ENSG00000100031_GGT1,ENSG00000100034_PPM1F,ENSG00000100036_SLC35E4,ENSG00000100038_TOP3B,ENSG00000100055_CYTH4,ENSG00000100056_DGCR14,ENSG00000100060_MFNG,ENSG00000100068_LRP5L,ENSG00000100075_SLC25A1,ENSG00000100077_GRK3,ENSG00000100083_GGA1,ENSG00000100084_HIRA,ENSG00000100092_SH3BP1,ENSG00000100097_LGALS1,ENSG00000100099_HPS4,ENSG00000100100_PIK3IP1,ENSG00000100104_SRRD,ENSG00000100105_PATZ1,ENSG00000100106_TRIOBP,ENSG00000100109_TFIP11,ENSG00000100116_GCAT,ENSG00000100124_ANKRD54,ENSG00000100129_EIF3L,ENSG00000100138_SNU13,ENSG00000100139_MICALL1,ENSG00000100147_CCDC134,ENSG00000100150_DEPDC5,ENSG00000100151_PICK1,ENSG00000100154_TTC28,ENSG00000100201_DDX17,ENSG00000100206_DMC1,ENSG00000100207_TCF20,ENSG00000100209_HSCB,ENSG00000100211_CBY1,ENSG00000100216_TOMM22,ENSG00000100219_XBP1,ENSG00000100220_RTCB,ENSG00000100221_JOSD1,ENSG00000100225_FBXO7,ENSG00000100226_GTPBP1,ENSG00000100227_POLDIP3,ENSG00000100228_RAB36,ENSG00000100239_PPP6R2,ENSG00000100241_SBF1,ENSG00000100242_SUN2,ENSG00000100243_CYB5R3,ENSG00000100246_DNAL4,ENSG00000100258_LMF2,ENSG00000100263_RHBDD3,ENSG00000100266_PACSIN2,ENSG00000100271_TTLL1,ENSG00000100280_AP1B1,ENSG00000100281_HMGXB4,ENSG00000100284_TOM1,ENSG00000100288_CHKB,ENSG00000100290_BIK,ENSG00000100292_HMOX1,ENSG00000100294_MCAT,ENSG00000100296_THOC5,ENSG00000100297_MCM5,ENSG00000100298_APOBEC3H,ENSG00000100299_ARSA,ENSG00000100300_TSPO,ENSG00000100304_TTLL12,ENSG00000100307_CBX7,ENSG00000100316_RPL3,ENSG00000100319_ZMAT5,ENSG00000100321_SYNGR1,ENSG00000100324_TAB1,ENSG00000100325_ASCC2,ENSG00000100330_MTMR3,ENSG00000100335_MIEF1,ENSG00000100342_APOL1,ENSG00000100345_MYH9,ENSG00000100346_CACNA1I,ENSG00000100347_SAMM50,ENSG00000100348_TXN2,ENSG00000100351_GRAP2,ENSG00000100353_EIF3D,ENSG00000100354_TNRC6B,ENSG00000100359_SGSM3,ENSG00000100360_IFT27,ENSG00000100364_KIAA0930,ENSG00000100365_NCF4,ENSG00000100368_CSF2RB,ENSG00000100372_SLC25A17,ENSG00000100376_FAM118A,ENSG00000100379_KCTD17,ENSG00000100380_ST13,ENSG00000100385_IL2RB,ENSG00000100387_RBX1,ENSG00000100393_EP300,ENSG00000100395_L3MBTL2,ENSG00000100401_RANGAP1,ENSG00000100403_ZC3H7B,ENSG00000100410_PHF5A,ENSG00000100412_ACO2,ENSG00000100413_POLR3H,ENSG00000100416_TRMU,ENSG00000100417_PMM1,ENSG00000100418_DESI1,ENSG00000100422_CERK,ENSG00000100425_BRD1,ENSG00000100426_ZBED4,ENSG00000100427_MLC1,ENSG00000100429_HDAC10,ENSG00000100439_ABHD4,ENSG00000100441_KHNYN,ENSG00000100442_FKBP3,ENSG00000100445_SDR39U1,ENSG00000100448_CTSG,ENSG00000100450_GZMH,ENSG00000100453_GZMB,ENSG00000100461_RBM23,ENSG00000100462_PRMT5,ENSG00000100473_COCH,ENSG00000100478_AP4S1,ENSG00000100479_POLE2,ENSG00000100483_VCPKMT,ENSG00000100485_SOS2,ENSG00000100490_CDKL1,ENSG00000100503_NIN,ENSG00000100504_PYGL,ENSG00000100505_TRIM9,ENSG00000100519_PSMC6,ENSG00000100522_GNPNAT1,ENSG00000100523_DDHD1,ENSG00000100526_CDKN3,ENSG00000100528_CNIH1,ENSG00000100532_CGRRF1,ENSG00000100554_ATP6V1D,ENSG00000100558_PLEK2,ENSG00000100564_PIGH,ENSG00000100567_PSMA3,ENSG00000100568_VTI1B,ENSG00000100575_TIMM9,ENSG00000100577_GSTZ1,ENSG00000100578_KIAA0586,ENSG00000100580_TMED8,ENSG00000100583_SAMD15,ENSG00000100591_AHSA1,ENSG00000100592_DAAM1,ENSG00000100596_SPTLC2,ENSG00000100599_RIN3,ENSG00000100600_LGMN,ENSG00000100601_ALKBH1,ENSG00000100603_SNW1,ENSG00000100605_ITPK1,ENSG00000100612_DHRS7,ENSG00000100614_PPM1A,ENSG00000100628_ASB2,ENSG00000100629_CEP128,ENSG00000100632_ERH,ENSG00000100644_HIF1A,ENSG00000100647_SUSD6,ENSG00000100650_SRSF5,ENSG00000100664_EIF5,ENSG00000100678_SLC8A3,ENSG00000100697_DICER1,ENSG00000100711_ZFYVE21,ENSG00000100714_MTHFD1,ENSG00000100721_TCL1A,ENSG00000100722_ZC3H14,ENSG00000100726_TELO2,ENSG00000100731_PCNX1,ENSG00000100744_GSKIP,ENSG00000100749_VRK1,ENSG00000100764_PSMC1,ENSG00000100784_RPS6KA5,ENSG00000100796_PPP4R3A,ENSG00000100802_C14orf93,ENSG00000100804_PSMB5,ENSG00000100811_YY1,ENSG00000100813_ACIN1,ENSG00000100814_CCNB1IP1,ENSG00000100815_TRIP11,ENSG00000100823_APEX1,ENSG00000100836_PABPN1,ENSG00000100852_ARHGAP5,ENSG00000100865_CINP,ENSG00000100883_SRP54,ENSG00000100888_CHD8,ENSG00000100889_PCK2,ENSG00000100890_KIAA0391,ENSG00000100897_DCAF11,ENSG00000100902_PSMA6,ENSG00000100906_NFKBIA,ENSG00000100908_EMC9,ENSG00000100911_PSME2,ENSG00000100916_BRMS1L,ENSG00000100918_REC8,ENSG00000100926_TM9SF1,ENSG00000100934_SEC23A,ENSG00000100938_GMPR2,ENSG00000100941_PNN,ENSG00000100949_RABGGTA,ENSG00000100979_PLTP,ENSG00000100982_PCIF1,ENSG00000100983_GSS,ENSG00000100985_MMP9,ENSG00000100991_TRPC4AP,ENSG00000100994_PYGB,ENSG00000100997_ABHD12,ENSG00000101003_GINS1,ENSG00000101017_CD40,ENSG00000101019_UQCC1,ENSG00000101040_ZMYND8,ENSG00000101052_IFT52,ENSG00000101057_MYBL2,ENSG00000101079_NDRG3,ENSG00000101082_SLA2,ENSG00000101084_C20orf24,ENSG00000101096_NFATC2,ENSG00000101104_PABPC1L,ENSG00000101109_STK4,ENSG00000101126_ADNP,ENSG00000101132_PFDN4,ENSG00000101138_CSTF1,ENSG00000101146_RAE1,ENSG00000101150_TPD52L2,ENSG00000101152_DNAJC5,ENSG00000101158_NELFCD,ENSG00000101160_CTSZ,ENSG00000101161_PRPF6,ENSG00000101162_TUBB1,ENSG00000101166_PRELID3B,ENSG00000101181_MTG2,ENSG00000101182_PSMA7,ENSG00000101187_SLCO4A1,ENSG00000101188_NTSR1,ENSG00000101189_MRGBP,ENSG00000101190_TCFL5,ENSG00000101191_DIDO1,ENSG00000101193_GID8,ENSG00000101194_SLC17A9,ENSG00000101199_ARFGAP1,ENSG00000101213_PTK6,ENSG00000101216_GMEB2,ENSG00000101220_C20orf27,ENSG00000101224_CDC25B,ENSG00000101236_RNF24,ENSG00000101246_ARFRP1,ENSG00000101247_NDUFAF5,ENSG00000101255_TRIB3,ENSG00000101265_RASSF2,ENSG00000101266_CSNK2A1,ENSG00000101290_CDS2,ENSG00000101294_HM13,ENSG00000101298_SNPH,ENSG00000101307_SIRPB1,ENSG00000101310_SEC23B,ENSG00000101335_MYL9,ENSG00000101336_HCK,ENSG00000101337_TM9SF4,ENSG00000101343_CRNKL1,ENSG00000101346_POFUT1,ENSG00000101347_SAMHD1,ENSG00000101350_KIF3B,ENSG00000101361_NOP56,ENSG00000101363_MANBAL,ENSG00000101365_IDH3B,ENSG00000101367_MAPRE1,ENSG00000101384_JAG1,ENSG00000101391_CDK5RAP1,ENSG00000101407_TTI1,ENSG00000101412_E2F1,ENSG00000101413_RPRD1B,ENSG00000101417_PXMP4,ENSG00000101421_CHMP4B,ENSG00000101425_BPI,ENSG00000101439_CST3,ENSG00000101442_ACTR5,ENSG00000101444_AHCY,ENSG00000101445_PPP1R16B,ENSG00000101447_FAM83D,ENSG00000101452_DHX35,ENSG00000101457_DNTTIP1,ENSG00000101460_MAP1LC3A,ENSG00000101464_PIGU,ENSG00000101473_ACOT8,ENSG00000101474_APMAP,ENSG00000101493_ZNF516,ENSG00000101544_ADNP2,ENSG00000101546_RBFA,ENSG00000101557_USP14,ENSG00000101558_VAPA,ENSG00000101574_METTL4,ENSG00000101577_LPIN2,ENSG00000101596_SMCHD1,ENSG00000101605_MYOM1,ENSG00000101608_MYL12A,ENSG00000101624_CEP76,ENSG00000101639_CEP192,ENSG00000101654_RNMT,ENSG00000101665_SMAD7,ENSG00000101695_RNF125,ENSG00000101745_ANKRD12,ENSG00000101751_POLI,ENSG00000101752_MIB1,ENSG00000101773_RBBP8,ENSG00000101782_RIOK3,ENSG00000101811_CSTF2,ENSG00000101842_VSIG1,ENSG00000101843_PSMD10,ENSG00000101844_ATG4A,ENSG00000101846_STS,ENSG00000101849_TBL1X,ENSG00000101856_PGRMC1,ENSG00000101868_POLA1,ENSG00000101882_NKAP,ENSG00000101888_NXT2,ENSG00000101901_ALG13,ENSG00000101911_PRPS2,ENSG00000101916_TLR8,ENSG00000101928_MOSPD1,ENSG00000101935_AMMECR1,ENSG00000101940_WDR13,ENSG00000101945_SUV39H1,ENSG00000101966_XIAP,ENSG00000101972_STAG2,ENSG00000101974_ATP11C,ENSG00000101977_MCF2,ENSG00000101986_ABCD1,ENSG00000101997_CCDC22,ENSG00000102003_SYP,ENSG00000102007_PLP2,ENSG00000102010_BMX,ENSG00000102030_NAA10,ENSG00000102032_RENBP,ENSG00000102034_ELF4,ENSG00000102043_MTMR8,ENSG00000102054_RBBP7,ENSG00000102057_KCND1,ENSG00000102078_SLC25A14,ENSG00000102081_FMR1,ENSG00000102096_PIM2,ENSG00000102098_SCML2,ENSG00000102100_SLC35A2,ENSG00000102103_PQBP1,ENSG00000102119_EMD,ENSG00000102125_TAZ,ENSG00000102144_PGK1,ENSG00000102145_GATA1,ENSG00000102158_MAGT1,ENSG00000102172_SMS,ENSG00000102178_UBL4A,ENSG00000102181_CD99L2,ENSG00000102189_EEA1,ENSG00000102218_RP2,ENSG00000102221_JADE3,ENSG00000102225_CDK16,ENSG00000102226_USP11,ENSG00000102230_PCYT1B,ENSG00000102241_HTATSF1,ENSG00000102245_CD40LG,ENSG00000102265_TIMP1,ENSG00000102309_PIN4,ENSG00000102312_PORCN,ENSG00000102316_MAGED2,ENSG00000102317_RBM3,ENSG00000102349_KLF8,ENSG00000102362_SYTL4,ENSG00000102384_CENPI,ENSG00000102390_PBDC1,ENSG00000102393_GLA,ENSG00000102401_ARMCX3,ENSG00000102409_BEX4,ENSG00000102445_RUBCNL,ENSG00000102471_NDFIP2,ENSG00000102524_TNFSF13B,ENSG00000102531_FNDC3A,ENSG00000102543_CDADC1,ENSG00000102547_CAB39L,ENSG00000102554_KLF5,ENSG00000102572_STK24,ENSG00000102575_ACP5,ENSG00000102580_DNAJC3,ENSG00000102595_UGGT2,ENSG00000102606_ARHGEF7,ENSG00000102699_PARP4,ENSG00000102710_SUPT20H,ENSG00000102738_MRPS31,ENSG00000102743_SLC25A15,ENSG00000102753_KPNA3,ENSG00000102755_FLT1,ENSG00000102760_RGCC,ENSG00000102763_VWA8,ENSG00000102780_DGKH,ENSG00000102781_KATNAL1,ENSG00000102786_INTS6,ENSG00000102796_DHRS12,ENSG00000102804_TSC22D1,ENSG00000102805_CLN5,ENSG00000102837_OLFM4,ENSG00000102858_MGRN1,ENSG00000102870_ZNF629,ENSG00000102871_TRADD,ENSG00000102879_CORO1A,ENSG00000102882_MAPK3,ENSG00000102886_GDPD3,ENSG00000102890_ELMO3,ENSG00000102893_PHKB,ENSG00000102897_LYRM1,ENSG00000102898_NUTF2,ENSG00000102900_NUP93,ENSG00000102901_CENPT,ENSG00000102908_NFAT5,ENSG00000102910_LONP2,ENSG00000102921_N4BP1,ENSG00000102931_ARL2BP,ENSG00000102967_DHODH,ENSG00000102974_CTCF,ENSG00000102977_ACD,ENSG00000102978_POLR2C,ENSG00000102981_PARD6A,ENSG00000102984_ZNF821,ENSG00000103005_USB1,ENSG00000103018_CYB5B,ENSG00000103024_NME3,ENSG00000103035_PSMD7,ENSG00000103037_SETD6,ENSG00000103042_SLC38A7,ENSG00000103043_VAC14,ENSG00000103047_TANGO6,ENSG00000103051_COG4,ENSG00000103056_SMPD3,ENSG00000103061_SLC7A6OS,ENSG00000103064_SLC7A6,ENSG00000103066_PLA2G15,ENSG00000103091_WDR59,ENSG00000103111_MON1B,ENSG00000103121_CMC2,ENSG00000103126_AXIN1,ENSG00000103145_HCFC1R1,ENSG00000103148_NPRL3,ENSG00000103150_MLYCD,ENSG00000103152_MPG,ENSG00000103160_HSDL1,ENSG00000103168_TAF1C,ENSG00000103174_NAGPA,ENSG00000103175_WFDC1,ENSG00000103184_SEC14L5,ENSG00000103187_COTL1,ENSG00000103194_USP10,ENSG00000103196_CRISPLD2,ENSG00000103197_TSC2,ENSG00000103199_ZNF500,ENSG00000103202_NME4,ENSG00000103222_ABCC1,ENSG00000103226_NOMO3,ENSG00000103227_LMF1,ENSG00000103245_NARFL,ENSG00000103248_MTHFSD,ENSG00000103249_CLCN7,ENSG00000103253_HAGHL,ENSG00000103254_FAM173A,ENSG00000103257_SLC7A5,ENSG00000103260_METRN,ENSG00000103264_FBXO31,ENSG00000103266_STUB1,ENSG00000103274_NUBP1,ENSG00000103275_UBE2I,ENSG00000103313_MEFV,ENSG00000103319_EEF2K,ENSG00000103326_CAPN15,ENSG00000103335_PIEZO1,ENSG00000103342_GSPT1,ENSG00000103343_ZNF174,ENSG00000103351_CLUAP1,ENSG00000103353_UBFD1,ENSG00000103356_EARS2,ENSG00000103363_TCEB2,ENSG00000103365_GGA2,ENSG00000103381_CPPED1,ENSG00000103404_USP31,ENSG00000103415_HMOX2,ENSG00000103423_DNAJA3,ENSG00000103429_BFAR,ENSG00000103479_RBL2,ENSG00000103489_XYLT1,ENSG00000103490_PYCARD,ENSG00000103494_RPGRIP1L,ENSG00000103495_MAZ,ENSG00000103496_STX4,ENSG00000103502_CDIPT,ENSG00000103507_BCKDK,ENSG00000103510_KAT8,ENSG00000103512_NOMO1,ENSG00000103522_IL21R,ENSG00000103534_TMC5,ENSG00000103540_CCP110,ENSG00000103544_C16orf62,ENSG00000103549_RNF40,ENSG00000103550_KNOP1,ENSG00000103569_AQP9,ENSG00000103591_AAGAB,ENSG00000103642_LACTB,ENSG00000103653_CSK,ENSG00000103657_HERC1,ENSG00000103671_TRIP4,ENSG00000103707_MTFMT,ENSG00000103723_AP3B2,ENSG00000103769_RAB11A,ENSG00000103811_CTSH,ENSG00000103852_TTC23,ENSG00000103876_FAH,ENSG00000103932_RPAP1,ENSG00000103942_HOMER2,ENSG00000103966_EHD4,ENSG00000103978_TMEM87A,ENSG00000103994_ZNF106,ENSG00000103995_CEP152,ENSG00000104043_ATP8B4,ENSG00000104047_DTWD1,ENSG00000104064_GABPB1,ENSG00000104081_BMF,ENSG00000104093_DMXL2,ENSG00000104129_DNAJC17,ENSG00000104131_EIF3J,ENSG00000104133_SPG11,ENSG00000104142_VPS18,ENSG00000104154_SLC30A4,ENSG00000104164_BLOC1S6,ENSG00000104177_MYEF2,ENSG00000104205_SGK3,ENSG00000104218_CSPP1,ENSG00000104219_ZDHHC2,ENSG00000104221_BRF2,ENSG00000104228_TRIM35,ENSG00000104231_ZFAND1,ENSG00000104267_CA2,ENSG00000104290_FZD3,ENSG00000104299_INTS9,ENSG00000104312_RIPK2,ENSG00000104320_NBN,ENSG00000104324_CPQ,ENSG00000104325_DECR1,ENSG00000104331_IMPAD1,ENSG00000104341_LAPTM4B,ENSG00000104343_UBE2W,ENSG00000104356_POP1,ENSG00000104361_NIPAL2,ENSG00000104365_IKBKB,ENSG00000104375_STK3,ENSG00000104381_GDAP1,ENSG00000104388_RAB2A,ENSG00000104408_EIF3E,ENSG00000104412_EMC2,ENSG00000104419_NDRG1,ENSG00000104427_ZC2HC1A,ENSG00000104432_IL7,ENSG00000104442_ARMC1,ENSG00000104447_TRPS1,ENSG00000104450_SPAG1,ENSG00000104472_CHRAC1,ENSG00000104490_NCALD,ENSG00000104497_SNX16,ENSG00000104517_UBR5,ENSG00000104518_GSDMD,ENSG00000104522_TSTA3,ENSG00000104524_PYCRL,ENSG00000104529_EEF1D,ENSG00000104549_SQLE,ENSG00000104613_INTS10,ENSG00000104626_ERI1,ENSG00000104635_SLC39A14,ENSG00000104643_MTMR9,ENSG00000104660_LEPROTL1,ENSG00000104671_DCTN6,ENSG00000104679_R3HCC1,ENSG00000104687_GSR,ENSG00000104689_TNFRSF10A,ENSG00000104691_UBXN8,ENSG00000104695_PPP2CB,ENSG00000104714_ERICH1,ENSG00000104731_KLHDC4,ENSG00000104738_MCM4,ENSG00000104756_KCTD9,ENSG00000104763_ASAH1,ENSG00000104765_BNIP3L,ENSG00000104774_MAN2B1,ENSG00000104783_KCNN4,ENSG00000104805_NUCB1,ENSG00000104812_GYS1,ENSG00000104814_MAP4K1,ENSG00000104823_ECH1,ENSG00000104824_HNRNPL,ENSG00000104825_NFKBIB,ENSG00000104852_SNRNP70,ENSG00000104853_CLPTM1,ENSG00000104856_RELB,ENSG00000104859_CLASRP,ENSG00000104866_PPP1R37,ENSG00000104870_FCGRT,ENSG00000104872_PIH1D1,ENSG00000104880_ARHGEF18,ENSG00000104883_PEX11G,ENSG00000104884_ERCC2,ENSG00000104885_DOT1L,ENSG00000104886_PLEKHJ1,ENSG00000104889_RNASEH2A,ENSG00000104892_KLC3,ENSG00000104894_CD37,ENSG00000104897_SF3A2,ENSG00000104903_LYL1,ENSG00000104904_OAZ1,ENSG00000104907_TRMT1,ENSG00000104915_STX10,ENSG00000104918_RETN,ENSG00000104921_FCER2,ENSG00000104936_DMPK,ENSG00000104946_TBC1D17,ENSG00000104957_CCDC130,ENSG00000104960_PTOV1,ENSG00000104964_AES,ENSG00000104969_SGTA,ENSG00000104972_LILRB1,ENSG00000104973_MED25,ENSG00000104974_LILRA1,ENSG00000104976_SNAPC2,ENSG00000104979_C19orf53,ENSG00000104980_TIMM44,ENSG00000104983_CCDC61,ENSG00000104998_IL27RA,ENSG00000105011_ASF1B,ENSG00000105048_TNNT1,ENSG00000105053_VRK3,ENSG00000105058_FAM32A,ENSG00000105063_PPP6R1,ENSG00000105085_MED26,ENSG00000105122_RASAL3,ENSG00000105127_AKAP8,ENSG00000105135_ILVBL,ENSG00000105136_ZNF419,ENSG00000105171_POP4,ENSG00000105173_CCNE1,ENSG00000105176_URI1,ENSG00000105185_PDCD5,ENSG00000105186_ANKRD27,ENSG00000105193_RPS16,ENSG00000105197_TIMM50,ENSG00000105202_FBL,ENSG00000105204_DYRK1B,ENSG00000105205_CLC,ENSG00000105220_GPI,ENSG00000105221_AKT2,ENSG00000105223_PLD3,ENSG00000105227_PRX,ENSG00000105229_PIAS4,ENSG00000105245_NUMBL,ENSG00000105248_CCDC94,ENSG00000105254_TBCB,ENSG00000105258_POLR2I,ENSG00000105281_SLC1A5,ENSG00000105287_PRKD2,ENSG00000105298_CACTIN,ENSG00000105321_CCDC9,ENSG00000105323_HNRNPUL1,ENSG00000105325_FZR1,ENSG00000105327_BBC3,ENSG00000105329_TGFB1,ENSG00000105339_DENND3,ENSG00000105341_ATP5SL,ENSG00000105352_CEACAM4,ENSG00000105355_PLIN3,ENSG00000105364_MRPL4,ENSG00000105369_CD79A,ENSG00000105371_ICAM4,ENSG00000105372_RPS19,ENSG00000105373_GLTSCR2,ENSG00000105374_NKG7,ENSG00000105376_ICAM5,ENSG00000105379_ETFB,ENSG00000105383_CD33,ENSG00000105393_BABAM1,ENSG00000105397_TYK2,ENSG00000105401_CDC37,ENSG00000105402_NAPA,ENSG00000105404_RABAC1,ENSG00000105429_MEGF8,ENSG00000105438_KDELR1,ENSG00000105443_CYTH2,ENSG00000105447_GRWD1,ENSG00000105472_CLEC11A,ENSG00000105483_CARD8,ENSG00000105486_LIG1,ENSG00000105497_ZNF175,ENSG00000105499_PLA2G4C,ENSG00000105501_SIGLEC5,ENSG00000105514_RAB3D,ENSG00000105516_DBP,ENSG00000105518_TMEM205,ENSG00000105519_CAPS,ENSG00000105520_PLPPR2,ENSG00000105552_BCAT2,ENSG00000105556_MIER2,ENSG00000105568_PPP2R1A,ENSG00000105576_TNPO2,ENSG00000105583_WDR83OS,ENSG00000105607_GCDH,ENSG00000105610_KLF1,ENSG00000105612_DNASE2,ENSG00000105617_LENG1,ENSG00000105618_PRPF31,ENSG00000105619_TFPT,ENSG00000105639_JAK3,ENSG00000105640_RPL18A,ENSG00000105643_ARRDC2,ENSG00000105655_ISYNA1,ENSG00000105656_ELL,ENSG00000105662_CRTC1,ENSG00000105669_COPE,ENSG00000105671_DDX49,ENSG00000105676_ARMC6,ENSG00000105677_TMEM147,ENSG00000105698_USF2,ENSG00000105700_KXD1,ENSG00000105701_FKBP8,ENSG00000105705_SUGP1,ENSG00000105708_ZNF14,ENSG00000105711_SCN1B,ENSG00000105717_PBX4,ENSG00000105722_ERF,ENSG00000105723_GSK3A,ENSG00000105726_ATP13A1,ENSG00000105732_ZNF574,ENSG00000105738_SIPA1L3,ENSG00000105750_ZNF85,ENSG00000105755_ETHE1,ENSG00000105767_CADM4,ENSG00000105771_SMG9,ENSG00000105778_AVL9,ENSG00000105793_GTPBP10,ENSG00000105810_CDK6,ENSG00000105819_PMPCB,ENSG00000105821_DNAJC2,ENSG00000105829_BET1,ENSG00000105835_NAMPT,ENSG00000105849_TWISTNB,ENSG00000105851_PIK3CG,ENSG00000105854_PON2,ENSG00000105855_ITGB8,ENSG00000105856_HBP1,ENSG00000105865_DUS4L,ENSG00000105866_SP4,ENSG00000105875_WDR91,ENSG00000105879_CBLL1,ENSG00000105887_MTPN,ENSG00000105926_MPP6,ENSG00000105939_ZC3HAV1,ENSG00000105948_TTC26,ENSG00000105953_OGDH,ENSG00000105963_ADAP1,ENSG00000105967_TFEC,ENSG00000105968_H2AFV,ENSG00000105971_CAV2,ENSG00000105983_LMBR1,ENSG00000105993_DNAJB6,ENSG00000106003_LFNG,ENSG00000106009_BRAT1,ENSG00000106012_IQCE,ENSG00000106028_SSBP1,ENSG00000106034_CPED1,ENSG00000106049_HIBADH,ENSG00000106052_TAX1BP1,ENSG00000106066_CPVL,ENSG00000106069_CHN2,ENSG00000106070_GRB10,ENSG00000106077_ABHD11,ENSG00000106080_FKBP14,ENSG00000106086_PLEKHA8,ENSG00000106100_NOD1,ENSG00000106105_GARS,ENSG00000106123_EPHB6,ENSG00000106144_CASP2,ENSG00000106153_CHCHD2,ENSG00000106211_HSPB1,ENSG00000106244_PDAP1,ENSG00000106245_BUD31,ENSG00000106246_PTCD1,ENSG00000106261_ZKSCAN1,ENSG00000106263_EIF3B,ENSG00000106266_SNX8,ENSG00000106268_NUDT1,ENSG00000106290_TAF6,ENSG00000106299_WASL,ENSG00000106305_AIMP2,ENSG00000106327_TFR2,ENSG00000106330_MOSPD3,ENSG00000106344_RBM28,ENSG00000106346_USP42,ENSG00000106348_IMPDH1,ENSG00000106351_AGFG2,ENSG00000106355_LSM5,ENSG00000106367_AP1S1,ENSG00000106392_C1GALT1,ENSG00000106397_PLOD3,ENSG00000106399_RPA3,ENSG00000106400_ZNHIT1,ENSG00000106404_CLDN15,ENSG00000106415_GLCCI1,ENSG00000106443_PHF14,ENSG00000106459_NRF1,ENSG00000106460_TMEM106B,ENSG00000106462_EZH2,ENSG00000106477_CEP41,ENSG00000106479_ZNF862,ENSG00000106484_MEST,ENSG00000106524_ANKMY2,ENSG00000106526_ACTR3C,ENSG00000106537_TSPAN13,ENSG00000106546_AHR,ENSG00000106554_CHCHD3,ENSG00000106560_GIMAP2,ENSG00000106565_TMEM176B,ENSG00000106588_PSMA2,ENSG00000106591_MRPL32,ENSG00000106603_COA1,ENSG00000106605_BLVRA,ENSG00000106608_URGCP,ENSG00000106609_TMEM248,ENSG00000106615_RHEB,ENSG00000106617_PRKAG2,ENSG00000106628_POLD2,ENSG00000106635_BCL7B,ENSG00000106636_YKT6,ENSG00000106638_TBL2,ENSG00000106665_CLIP2,ENSG00000106682_EIF4H,ENSG00000106683_LIMK1,ENSG00000106692_FKTN,ENSG00000106701_FSD1L,ENSG00000106714_CNTNAP3,ENSG00000106723_SPIN1,ENSG00000106733_NMRK1,ENSG00000106771_TMEM245,ENSG00000106772_PRUNE2,ENSG00000106780_MEGF9,ENSG00000106785_TRIM14,ENSG00000106789_CORO2A,ENSG00000106799_TGFBR1,ENSG00000106803_SEC61B,ENSG00000106804_C5,ENSG00000106829_TLE4,ENSG00000106868_SUSD1,ENSG00000106948_AKNA,ENSG00000106952_TNFSF8,ENSG00000106976_DNM1,ENSG00000106993_CDC37L1,ENSG00000107020_PLGRKT,ENSG00000107021_TBC1D13,ENSG00000107036_RIC1,ENSG00000107077_KDM4C,ENSG00000107099_DOCK8,ENSG00000107104_KANK1,ENSG00000107140_TESK1,ENSG00000107164_FUBP3,ENSG00000107175_CREB3,ENSG00000107185_RGP1,ENSG00000107201_DDX58,ENSG00000107223_EDF1,ENSG00000107242_PIP5K1B,ENSG00000107249_GLIS3,ENSG00000107262_BAG1,ENSG00000107263_RAPGEF1,ENSG00000107281_NPDC1,ENSG00000107290_SETX,ENSG00000107331_ABCA2,ENSG00000107341_UBE2R2,ENSG00000107362_ABHD17B,ENSG00000107371_EXOSC3,ENSG00000107372_ZFAND5,ENSG00000107404_DVL1,ENSG00000107438_PDLIM1,ENSG00000107443_CCNJ,ENSG00000107485_GATA3,ENSG00000107521_HPS1,ENSG00000107537_PHYH,ENSG00000107551_RASSF4,ENSG00000107554_DNMBP,ENSG00000107560_RAB11FIP2,ENSG00000107566_ERLIN1,ENSG00000107581_EIF3A,ENSG00000107611_CUBN,ENSG00000107614_TRDMT1,ENSG00000107625_DDX50,ENSG00000107643_MAPK8,ENSG00000107651_SEC23IP,ENSG00000107669_ATE1,ENSG00000107672_NSMCE4A,ENSG00000107679_PLEKHA1,ENSG00000107736_CDH23,ENSG00000107738_C10orf54,ENSG00000107742_SPOCK2,ENSG00000107745_MICU1,ENSG00000107758_PPP3CB,ENSG00000107771_CCSER2,ENSG00000107779_BMPR1A,ENSG00000107789_MINPP1,ENSG00000107796_ACTA2,ENSG00000107798_LIPA,ENSG00000107815_TWNK,ENSG00000107816_LZTS2,ENSG00000107819_SFXN3,ENSG00000107829_FBXW4,ENSG00000107833_NPM3,ENSG00000107854_TNKS2,ENSG00000107862_GBF1,ENSG00000107863_ARHGAP21,ENSG00000107864_CPEB3,ENSG00000107872_FBXL15,ENSG00000107874_CUEDC2,ENSG00000107882_SUFU,ENSG00000107890_ANKRD26,ENSG00000107897_ACBD5,ENSG00000107902_LHPP,ENSG00000107929_LARP4B,ENSG00000107937_GTPBP4,ENSG00000107938_EDRF1,ENSG00000107949_BCCIP,ENSG00000107951_MTPAP,ENSG00000107954_NEURL1,ENSG00000107957_SH3PXD2A,ENSG00000107959_PITRM1,ENSG00000107960_STN1,ENSG00000107968_MAP3K8,ENSG00000108010_GLRX3,ENSG00000108021_FAM208B,ENSG00000108039_XPNPEP1,ENSG00000108055_SMC3,ENSG00000108061_SHOC2,ENSG00000108064_TFAM,ENSG00000108091_CCDC6,ENSG00000108094_CUL2,ENSG00000108100_CCNY,ENSG00000108106_UBE2S,ENSG00000108107_RPL28,ENSG00000108175_ZMIZ1,ENSG00000108179_PPIF,ENSG00000108187_PBLD,ENSG00000108219_TSPAN14,ENSG00000108239_TBC1D12,ENSG00000108244_KRT23,ENSG00000108256_NUFIP2,ENSG00000108262_GIT1,ENSG00000108298_RPL19,ENSG00000108306_FBXL20,ENSG00000108309_RUNDC3A,ENSG00000108312_UBTF,ENSG00000108344_PSMD3,ENSG00000108349_CASC3,ENSG00000108352_RAPGEFL1,ENSG00000108370_RGS9,ENSG00000108384_RAD51C,ENSG00000108387_SEPT4,ENSG00000108389_MTMR4,ENSG00000108395_TRIM37,ENSG00000108405_P2RX1,ENSG00000108406_DHX40,ENSG00000108423_TUBD1,ENSG00000108424_KPNB1,ENSG00000108433_GOSR2,ENSG00000108439_PNPO,ENSG00000108443_RPS6KB1,ENSG00000108465_CDK5RAP3,ENSG00000108468_CBX1,ENSG00000108469_RECQL5,ENSG00000108474_PIGL,ENSG00000108479_GALK1,ENSG00000108506_INTS2,ENSG00000108509_CAMTA2,ENSG00000108510_MED13,ENSG00000108515_ENO3,ENSG00000108518_PFN1,ENSG00000108523_RNF167,ENSG00000108528_SLC25A11,ENSG00000108556_CHRNE,ENSG00000108557_RAI1,ENSG00000108559_NUP88,ENSG00000108561_C1QBP,ENSG00000108576_SLC6A4,ENSG00000108578_BLMH,ENSG00000108582_CPD,ENSG00000108587_GOSR1,ENSG00000108588_CCDC47,ENSG00000108590_MED31,ENSG00000108591_DRG2,ENSG00000108592_FTSJ3,ENSG00000108599_AKAP10,ENSG00000108604_SMARCD2,ENSG00000108622_ICAM2,ENSG00000108639_SYNGR2,ENSG00000108651_UTP6,ENSG00000108654_DDX5,ENSG00000108666_C17orf75,ENSG00000108669_CYTH1,ENSG00000108671_PSMD11,ENSG00000108679_LGALS3BP,ENSG00000108733_PEX12,ENSG00000108771_DHX58,ENSG00000108773_KAT2A,ENSG00000108774_RAB5C,ENSG00000108784_NAGLU,ENSG00000108788_MLX,ENSG00000108798_ABI3,ENSG00000108799_EZH1,ENSG00000108819_PPP1R9B,ENSG00000108826_MRPL27,ENSG00000108828_VAT1,ENSG00000108829_LRRC59,ENSG00000108839_ALOX12,ENSG00000108840_HDAC5,ENSG00000108846_ABCC3,ENSG00000108848_LUC7L3,ENSG00000108854_SMURF2,ENSG00000108861_DUSP3,ENSG00000108883_EFTUD2,ENSG00000108932_SLC16A6,ENSG00000108946_PRKAR1A,ENSG00000108950_FAM20A,ENSG00000108953_YWHAE,ENSG00000108960_MMD,ENSG00000108961_RANGRF,ENSG00000108963_DPH1,ENSG00000108984_MAP2K6,ENSG00000109016_DHRS7B,ENSG00000109046_WSB1,ENSG00000109062_SLC9A3R1,ENSG00000109063_MYH3,ENSG00000109065_NAT9,ENSG00000109066_TMEM104,ENSG00000109079_TNFAIP1,ENSG00000109083_IFT20,ENSG00000109084_TMEM97,ENSG00000109103_UNC119,ENSG00000109107_ALDOC,ENSG00000109111_SUPT6H,ENSG00000109113_RAB34,ENSG00000109118_PHF12,ENSG00000109133_TMEM33,ENSG00000109171_SLAIN2,ENSG00000109180_OCIAD1,ENSG00000109184_DCUN1D4,ENSG00000109189_USP46,ENSG00000109220_CHIC2,ENSG00000109270_LAMTOR3,ENSG00000109272_PF4V1,ENSG00000109320_NFKB1,ENSG00000109323_MANBA,ENSG00000109332_UBE2D3,ENSG00000109339_MAPK10,ENSG00000109381_ELF2,ENSG00000109390_NDUFC1,ENSG00000109436_TBC1D9,ENSG00000109445_ZNF330,ENSG00000109452_INPP4B,ENSG00000109458_GAB1,ENSG00000109466_KLHL2,ENSG00000109475_RPL34,ENSG00000109519_GRPEL1,ENSG00000109534_GAR1,ENSG00000109536_FRG1,ENSG00000109572_CLCN3,ENSG00000109586_GALNT7,ENSG00000109606_DHX15,ENSG00000109618_SEPSECS,ENSG00000109654_TRIM2,ENSG00000109667_SLC2A9,ENSG00000109670_FBXW7,ENSG00000109674_NEIL3,ENSG00000109680_TBC1D19,ENSG00000109685_WHSC1,ENSG00000109689_STIM2,ENSG00000109736_MFSD10,ENSG00000109743_BST1,ENSG00000109756_RAPGEF2,ENSG00000109762_SNX25,ENSG00000109775_UFSP2,ENSG00000109787_KLF3,ENSG00000109790_KLHL5,ENSG00000109805_NCAPG,ENSG00000109814_UGDH,ENSG00000109854_HTATIP2,ENSG00000109861_CTSC,ENSG00000109881_CCDC34,ENSG00000109906_ZBTB16,ENSG00000109911_ELP4,ENSG00000109917_ZPR1,ENSG00000109919_MTCH2,ENSG00000109920_FNBP4,ENSG00000109927_TECTA,ENSG00000109929_SC5D,ENSG00000109943_CRTAM,ENSG00000109944_C11orf63,ENSG00000109956_B3GAT1,ENSG00000109971_HSPA8,ENSG00000110002_VWA5A,ENSG00000110011_DNAJC4,ENSG00000110013_SIAE,ENSG00000110025_SNX15,ENSG00000110031_LPXN,ENSG00000110042_DTX4,ENSG00000110046_ATG2A,ENSG00000110047_EHD1,ENSG00000110048_OSBP,ENSG00000110057_UNC93B1,ENSG00000110060_PUS3,ENSG00000110063_DCPS,ENSG00000110066_KMT5B,ENSG00000110074_FOXRED1,ENSG00000110075_PPP6R3,ENSG00000110077_MS4A6A,ENSG00000110079_MS4A4A,ENSG00000110080_ST3GAL4,ENSG00000110090_CPT1A,ENSG00000110104_CCDC86,ENSG00000110107_PRPF19,ENSG00000110108_TMEM109,ENSG00000110171_TRIM3,ENSG00000110172_CHORDC1,ENSG00000110200_ANAPC15,ENSG00000110203_FOLR3,ENSG00000110218_PANX1,ENSG00000110237_ARHGEF17,ENSG00000110274_CEP164,ENSG00000110315_RNF141,ENSG00000110318_CEP126,ENSG00000110321_EIF4G2,ENSG00000110324_IL10RA,ENSG00000110330_BIRC2,ENSG00000110344_UBE4A,ENSG00000110367_DDX6,ENSG00000110395_CBL,ENSG00000110400_NECTIN1,ENSG00000110422_HIPK3,ENSG00000110429_FBXO3,ENSG00000110435_PDHX,ENSG00000110436_SLC1A2,ENSG00000110442_COMMD9,ENSG00000110446_SLC15A3,ENSG00000110448_CD5,ENSG00000110455_ACCS,ENSG00000110497_AMBRA1,ENSG00000110514_MADD,ENSG00000110536_PTPMT1,ENSG00000110583_NAA40,ENSG00000110619_CARS,ENSG00000110628_SLC22A18,ENSG00000110651_CD81,ENSG00000110660_SLC35F2,ENSG00000110665_C11orf21,ENSG00000110693_SOX6,ENSG00000110696_C11orf58,ENSG00000110697_PITPNM1,ENSG00000110700_RPS13,ENSG00000110711_AIP,ENSG00000110713_NUP98,ENSG00000110717_NDUFS8,ENSG00000110719_TCIRG1,ENSG00000110721_CHKA,ENSG00000110723_EXPH5,ENSG00000110756_HPS5,ENSG00000110768_GTF2H1,ENSG00000110777_POU2AF1,ENSG00000110799_VWF,ENSG00000110801_PSMD9,ENSG00000110841_PPFIBP1,ENSG00000110844_PRPF40B,ENSG00000110848_CD69,ENSG00000110851_PRDM4,ENSG00000110852_CLEC2B,ENSG00000110871_COQ5,ENSG00000110876_SELPLG,ENSG00000110880_CORO1C,ENSG00000110888_CAPRIN2,ENSG00000110906_KCTD10,ENSG00000110911_SLC11A2,ENSG00000110917_MLEC,ENSG00000110921_MVK,ENSG00000110925_CSRNP2,ENSG00000110931_CAMKK2,ENSG00000110934_BIN2,ENSG00000110944_IL23A,ENSG00000110955_ATP5B,ENSG00000110958_PTGES3,ENSG00000110987_BCL7A,ENSG00000111011_RSRC2,ENSG00000111052_LIN7A,ENSG00000111058_ACSS3,ENSG00000111110_PPM1H,ENSG00000111142_METAP2,ENSG00000111144_LTA4H,ENSG00000111145_ELK3,ENSG00000111181_SLC6A12,ENSG00000111196_MAGOHB,ENSG00000111203_ITFG2,ENSG00000111206_FOXM1,ENSG00000111215_PRR4,ENSG00000111224_PARP11,ENSG00000111229_ARPC3,ENSG00000111231_GPN3,ENSG00000111237_VPS29,ENSG00000111247_RAD51AP1,ENSG00000111252_SH2B3,ENSG00000111254_AKAP3,ENSG00000111261_MANSC1,ENSG00000111266_DUSP16,ENSG00000111269_CREBL2,ENSG00000111271_ACAD10,ENSG00000111275_ALDH2,ENSG00000111276_CDKN1B,ENSG00000111300_NAA25,ENSG00000111321_LTBR,ENSG00000111325_OGFOD2,ENSG00000111328_CDK2AP1,ENSG00000111331_OAS3,ENSG00000111335_OAS2,ENSG00000111348_ARHGDIB,ENSG00000111358_GTF2H3,ENSG00000111361_EIF2B1,ENSG00000111364_DDX55,ENSG00000111371_SLC38A1,ENSG00000111412_C12orf49,ENSG00000111424_VDR,ENSG00000111445_RFC5,ENSG00000111450_STX2,ENSG00000111452_ADGRD1,ENSG00000111481_COPZ1,ENSG00000111490_TBC1D30,ENSG00000111530_CAND1,ENSG00000111540_RAB5B,ENSG00000111554_MDM1,ENSG00000111581_NUP107,ENSG00000111596_CNOT2,ENSG00000111602_TIMELESS,ENSG00000111605_CPSF6,ENSG00000111615_KRR1,ENSG00000111639_MRPL51,ENSG00000111640_GAPDH,ENSG00000111641_NOP2,ENSG00000111642_CHD4,ENSG00000111644_ACRBP,ENSG00000111647_UHRF1BP1L,ENSG00000111652_COPS7A,ENSG00000111653_ING4,ENSG00000111665_CDCA3,ENSG00000111666_CHPT1,ENSG00000111667_USP5,ENSG00000111669_TPI1,ENSG00000111670_GNPTAB,ENSG00000111671_SPSB2,ENSG00000111674_ENO2,ENSG00000111678_C12orf57,ENSG00000111679_PTPN6,ENSG00000111684_LPCAT3,ENSG00000111696_NT5DC3,ENSG00000111707_SUDS3,ENSG00000111711_GOLT1B,ENSG00000111716_LDHB,ENSG00000111725_PRKAB1,ENSG00000111726_CMAS,ENSG00000111727_HCFC2,ENSG00000111728_ST8SIA1,ENSG00000111729_CLEC4A,ENSG00000111731_C2CD5,ENSG00000111737_RAB35,ENSG00000111775_COX6A1,ENSG00000111785_RIC8B,ENSG00000111786_SRSF9,ENSG00000111790_FGFR1OP2,ENSG00000111796_KLRB1,ENSG00000111801_BTN3A3,ENSG00000111802_TDP2,ENSG00000111817_DSE,ENSG00000111832_RWDD1,ENSG00000111837_MAK,ENSG00000111843_TMEM14C,ENSG00000111845_PAK1IP1,ENSG00000111846_GCNT2,ENSG00000111850_SMIM8,ENSG00000111859_NEDD9,ENSG00000111860_CEP85L,ENSG00000111863_ADTRP,ENSG00000111875_ASF1A,ENSG00000111877_MCM9,ENSG00000111879_FAM184A,ENSG00000111880_RNGTT,ENSG00000111885_MAN1A1,ENSG00000111886_GABRR2,ENSG00000111897_SERINC1,ENSG00000111906_HDDC2,ENSG00000111911_HINT3,ENSG00000111912_NCOA7,ENSG00000111913_FAM65B,ENSG00000111961_SASH1,ENSG00000111962_UST,ENSG00000112029_FBXO5,ENSG00000112031_MTRF1L,ENSG00000112033_PPARD,ENSG00000112039_FANCE,ENSG00000112053_SLC26A8,ENSG00000112062_MAPK14,ENSG00000112077_RHAG,ENSG00000112078_KCTD20,ENSG00000112079_STK38,ENSG00000112081_SRSF3,ENSG00000112096_SOD2,ENSG00000112110_MRPL18,ENSG00000112118_MCM3,ENSG00000112130_RNF8,ENSG00000112137_PHACTR1,ENSG00000112139_MDGA1,ENSG00000112144_ICK,ENSG00000112146_FBXO9,ENSG00000112149_CD83,ENSG00000112159_MDN1,ENSG00000112167_SAYSD1,ENSG00000112182_BACH2,ENSG00000112195_TREML2,ENSG00000112200_ZNF451,ENSG00000112208_BAG2,ENSG00000112210_RAB23,ENSG00000112212_TSPO2,ENSG00000112232_KHDRBS2,ENSG00000112234_FBXL4,ENSG00000112237_CCNC,ENSG00000112242_E2F3,ENSG00000112245_PTP4A1,ENSG00000112249_ASCC3,ENSG00000112282_MED23,ENSG00000112290_WASF1,ENSG00000112293_GPLD1,ENSG00000112294_ALDH5A1,ENSG00000112297_AIM1,ENSG00000112299_VNN1,ENSG00000112303_VNN2,ENSG00000112304_ACOT13,ENSG00000112305_SMAP1,ENSG00000112306_RPS12,ENSG00000112308_C6orf62,ENSG00000112312_GMNN,ENSG00000112335_SNX3,ENSG00000112339_HBS1L,ENSG00000112343_TRIM38,ENSG00000112357_PEX7,ENSG00000112365_ZBTB24,ENSG00000112367_FIG4,ENSG00000112394_SLC16A10,ENSG00000112406_HECA,ENSG00000112419_PHACTR2,ENSG00000112425_EPM2A,ENSG00000112473_SLC39A7,ENSG00000112511_PHF1,ENSG00000112514_CUTA,ENSG00000112531_QKI,ENSG00000112561_TFEB,ENSG00000112576_CCND3,ENSG00000112578_BYSL,ENSG00000112584_FAM120B,ENSG00000112592_TBP,ENSG00000112624_GLTSCR1L,ENSG00000112640_PPP2R5D,ENSG00000112651_MRPL2,ENSG00000112655_PTK7,ENSG00000112658_SRF,ENSG00000112659_CUL9,ENSG00000112667_DNPH1,ENSG00000112679_DUSP22,ENSG00000112685_EXOC2,ENSG00000112695_COX7A2,ENSG00000112697_TMEM30A,ENSG00000112699_GMDS,ENSG00000112701_SENP6,ENSG00000112715_VEGFA,ENSG00000112739_PRPF4B,ENSG00000112742_TTK,ENSG00000112759_SLC29A1,ENSG00000112763_BTN2A1,ENSG00000112773_FAM46A,ENSG00000112782_CLIC5,ENSG00000112787_FBRSL1,ENSG00000112796_ENPP5,ENSG00000112799_LY86,ENSG00000112851_ERBIN,ENSG00000112855_HARS2,ENSG00000112874_NUDT12,ENSG00000112877_CEP72,ENSG00000112893_MAN2A1,ENSG00000112941_PAPD7,ENSG00000112972_HMGCS1,ENSG00000112977_DAP,ENSG00000112983_BRD8,ENSG00000112984_KIF20A,ENSG00000112992_NNT,ENSG00000112996_MRPS30,ENSG00000113013_HSPA9,ENSG00000113048_MRPS27,ENSG00000113068_PFDN1,ENSG00000113070_HBEGF,ENSG00000113088_GZMK,ENSG00000113108_APBB3,ENSG00000113119_TMCO6,ENSG00000113140_SPARC,ENSG00000113141_IK,ENSG00000113161_HMGCR,ENSG00000113163_COL4A3BP,ENSG00000113194_FAF2,ENSG00000113240_CLK4,ENSG00000113249_HAVCR1,ENSG00000113263_ITK,ENSG00000113269_RNF130,ENSG00000113272_THG1L,ENSG00000113273_ARSB,ENSG00000113282_CLINT1,ENSG00000113300_CNOT6,ENSG00000113303_BTNL8,ENSG00000113312_TTC1,ENSG00000113318_MSH3,ENSG00000113319_RASGRF2,ENSG00000113328_CCNG1,ENSG00000113360_DROSHA,ENSG00000113368_LMNB1,ENSG00000113369_ARRDC3,ENSG00000113384_GOLPH3,ENSG00000113387_SUB1,ENSG00000113391_FAM172A,ENSG00000113407_TARS,ENSG00000113441_LNPEP,ENSG00000113448_PDE4D,ENSG00000113456_RAD1,ENSG00000113460_BRIX1,ENSG00000113494_PRLR,ENSG00000113504_SLC12A7,ENSG00000113522_RAD50,ENSG00000113532_ST8SIA4,ENSG00000113552_GNPDA1,ENSG00000113555_PCDH12,ENSG00000113558_SKP1,ENSG00000113569_NUP155,ENSG00000113575_PPP2CA,ENSG00000113580_NR3C1,ENSG00000113583_C5orf15,ENSG00000113593_PPWD1,ENSG00000113595_TRIM23,ENSG00000113597_TRAPPC13,ENSG00000113615_SEC24A,ENSG00000113621_TXNDC15,ENSG00000113638_TTC33,ENSG00000113643_RARS,ENSG00000113648_H2AFY,ENSG00000113649_TCERG1,ENSG00000113658_SMAD5,ENSG00000113712_CSNK1A1,ENSG00000113716_HMGXB3,ENSG00000113719_ERGIC1,ENSG00000113721_PDGFRB,ENSG00000113732_ATP6V0E1,ENSG00000113734_BNIP1,ENSG00000113742_CPEB4,ENSG00000113749_HRH2,ENSG00000113758_DBN1,ENSG00000113761_ZNF346,ENSG00000113790_EHHADH,ENSG00000113810_SMC4,ENSG00000113811_SELENOK,ENSG00000113812_ACTR8,ENSG00000113838_TBCCD1,ENSG00000113845_TIMMDC1,ENSG00000113851_CRBN,ENSG00000113916_BCL6,ENSG00000113924_HGD,ENSG00000113966_ARL6,ENSG00000113971_NPHP3,ENSG00000114013_CD86,ENSG00000114021_NIT2,ENSG00000114023_FAM162A,ENSG00000114026_OGG1,ENSG00000114030_KPNA1,ENSG00000114054_PCCB,ENSG00000114062_UBE3A,ENSG00000114098_ARMC8,ENSG00000114107_CEP70,ENSG00000114120_SLC25A36,ENSG00000114125_RNF7,ENSG00000114126_TFDP2,ENSG00000114127_XRN1,ENSG00000114166_KAT2B,ENSG00000114209_PDCD10,ENSG00000114268_PFKFB4,ENSG00000114270_COL7A1,ENSG00000114302_PRKAR2A,ENSG00000114315_HES1,ENSG00000114316_USP4,ENSG00000114331_ACAP2,ENSG00000114346_ECT2,ENSG00000114353_GNAI2,ENSG00000114354_TFG,ENSG00000114374_USP9Y,ENSG00000114383_TUSC2,ENSG00000114388_NPRL2,ENSG00000114391_RPL24,ENSG00000114395_CYB561D2,ENSG00000114405_C3orf14,ENSG00000114416_FXR1,ENSG00000114423_CBLB,ENSG00000114439_BBX,ENSG00000114446_IFT57,ENSG00000114450_GNB4,ENSG00000114473_IQCG,ENSG00000114480_GBE1,ENSG00000114491_UMPS,ENSG00000114503_NCBP2,ENSG00000114520_SNX4,ENSG00000114541_FRMD4B,ENSG00000114544_SLC41A3,ENSG00000114554_PLXNA1,ENSG00000114573_ATP6V1A,ENSG00000114626_ABTB1,ENSG00000114648_KLHL18,ENSG00000114650_SCAP,ENSG00000114656_KIAA1257,ENSG00000114670_NEK11,ENSG00000114686_MRPL3,ENSG00000114698_PLSCR4,ENSG00000114735_HEMK1,ENSG00000114737_CISH,ENSG00000114738_MAPKAPK3,ENSG00000114739_ACVR2B,ENSG00000114742_WDR48,ENSG00000114744_COMMD2,ENSG00000114745_GORASP1,ENSG00000114767_RRP9,ENSG00000114770_ABCC5,ENSG00000114779_ABHD14B,ENSG00000114784_EIF1B,ENSG00000114796_KLHL24,ENSG00000114805_PLCH1,ENSG00000114812_VIPR1,ENSG00000114841_DNAH1,ENSG00000114850_SSR3,ENSG00000114853_ZBTB47,ENSG00000114857_NKTR,ENSG00000114861_FOXP1,ENSG00000114867_EIF4G1,ENSG00000114902_SPCS1,ENSG00000114904_NEK4,ENSG00000114933_INO80D,ENSG00000114942_EEF1B2,ENSG00000114956_DGUOK,ENSG00000114978_MOB1A,ENSG00000114982_KANSL3,ENSG00000114988_LMAN2L,ENSG00000114999_TTL,ENSG00000115020_PIKFYVE,ENSG00000115042_FAHD2A,ENSG00000115053_NCL,ENSG00000115073_ACTR1B,ENSG00000115084_SLC35F5,ENSG00000115085_ZAP70,ENSG00000115091_ACTR3,ENSG00000115107_STEAP3,ENSG00000115109_EPB41L5,ENSG00000115128_SF3B6,ENSG00000115129_TP53I3,ENSG00000115137_DNAJC27,ENSG00000115138_POMC,ENSG00000115145_STAM2,ENSG00000115159_GPD2,ENSG00000115163_CENPA,ENSG00000115165_CYTIP,ENSG00000115170_ACVR1,ENSG00000115204_MPV17,ENSG00000115207_GTF3C2,ENSG00000115211_EIF2B4,ENSG00000115216_NRBP1,ENSG00000115221_ITGB6,ENSG00000115232_ITGA4,ENSG00000115233_PSMD14,ENSG00000115234_SNX17,ENSG00000115239_ASB3,ENSG00000115241_PPM1G,ENSG00000115267_IFIH1,ENSG00000115268_RPS15,ENSG00000115271_GCA,ENSG00000115274_INO80B,ENSG00000115275_MOGS,ENSG00000115282_TTC31,ENSG00000115286_NDUFS7,ENSG00000115289_PCGF1,ENSG00000115295_CLIP4,ENSG00000115306_SPTBN1,ENSG00000115307_AUP1,ENSG00000115310_RTN4,ENSG00000115317_HTRA2,ENSG00000115318_LOXL3,ENSG00000115325_DOK1,ENSG00000115339_GALNT3,ENSG00000115350_POLE4,ENSG00000115355_CCDC88A,ENSG00000115364_MRPL19,ENSG00000115365_LANCL1,ENSG00000115368_WDR75,ENSG00000115392_FANCL,ENSG00000115415_STAT1,ENSG00000115419_GLS,ENSG00000115421_PAPOLG,ENSG00000115423_DNAH6,ENSG00000115425_PECR,ENSG00000115446_UNC50,ENSG00000115457_IGFBP2,ENSG00000115459_ELMOD3,ENSG00000115464_USP34,ENSG00000115484_CCT4,ENSG00000115486_GGCX,ENSG00000115504_EHBP1,ENSG00000115514_TXNDC9,ENSG00000115520_COQ10B,ENSG00000115523_GNLY,ENSG00000115524_SF3B1,ENSG00000115525_ST3GAL5,ENSG00000115526_CHST10,ENSG00000115539_PDCL3,ENSG00000115540_MOB4,ENSG00000115541_HSPE1,ENSG00000115548_KDM3A,ENSG00000115561_CHMP3,ENSG00000115568_ZNF142,ENSG00000115590_IL1R2,ENSG00000115594_IL1R1,ENSG00000115602_IL1RL1,ENSG00000115604_IL18R1,ENSG00000115607_IL18RAP,ENSG00000115641_FHL2,ENSG00000115649_CNPPD1,ENSG00000115652_UXS1,ENSG00000115661_STK16,ENSG00000115677_HDLBP,ENSG00000115685_PPP1R7,ENSG00000115687_PASK,ENSG00000115694_STK25,ENSG00000115738_ID2,ENSG00000115750_TAF1B,ENSG00000115756_HPCAL1,ENSG00000115758_ODC1,ENSG00000115760_BIRC6,ENSG00000115761_NOL10,ENSG00000115762_PLEKHB2,ENSG00000115806_GORASP2,ENSG00000115808_STRN,ENSG00000115816_CEBPZ,ENSG00000115825_PRKD3,ENSG00000115827_DCAF17,ENSG00000115828_QPCT,ENSG00000115839_RAB3GAP1,ENSG00000115840_SLC25A12,ENSG00000115841_RMDN2,ENSG00000115866_DARS,ENSG00000115875_SRSF7,ENSG00000115896_PLCL1,ENSG00000115902_SLC1A4,ENSG00000115904_SOS1,ENSG00000115919_KYNU,ENSG00000115935_WIPF1,ENSG00000115942_ORC2,ENSG00000115944_COX7A2L,ENSG00000115946_PNO1,ENSG00000115947_ORC4,ENSG00000115956_PLEK,ENSG00000115966_ATF2,ENSG00000115970_THADA,ENSG00000115977_AAK1,ENSG00000115993_TRAK2,ENSG00000115998_C2orf42,ENSG00000116001_TIA1,ENSG00000116005_PCYOX1,ENSG00000116016_EPAS1,ENSG00000116017_ARID3A,ENSG00000116030_SUMO1,ENSG00000116044_NFE2L2,ENSG00000116062_MSH6,ENSG00000116095_PLEKHA3,ENSG00000116106_EPHA4,ENSG00000116120_FARSB,ENSG00000116127_ALMS1,ENSG00000116128_BCL9,ENSG00000116133_DHCR24,ENSG00000116138_DNAJC16,ENSG00000116151_MORN1,ENSG00000116157_GPX7,ENSG00000116161_CACYBP,ENSG00000116171_SCP2,ENSG00000116191_RALGPS2,ENSG00000116198_CEP104,ENSG00000116199_FAM20B,ENSG00000116205_TCEANC2,ENSG00000116209_TMEM59,ENSG00000116212_LRRC42,ENSG00000116213_WRAP73,ENSG00000116221_MRPL37,ENSG00000116237_ICMT,ENSG00000116251_RPL22,ENSG00000116260_QSOX1,ENSG00000116266_STXBP3,ENSG00000116273_PHF13,ENSG00000116288_PARK7,ENSG00000116299_KIAA1324,ENSG00000116337_AMPD2,ENSG00000116350_SRSF4,ENSG00000116353_MECR,ENSG00000116396_KCNC4,ENSG00000116406_EDEM3,ENSG00000116455_WDR77,ENSG00000116459_ATP5F1,ENSG00000116473_RAP1A,ENSG00000116478_HDAC1,ENSG00000116489_CAPZA1,ENSG00000116497_S100PBP,ENSG00000116514_RNF19B,ENSG00000116521_SCAMP3,ENSG00000116525_TRIM62,ENSG00000116539_ASH1L,ENSG00000116560_SFPQ,ENSG00000116574_RHOU,ENSG00000116580_GON4L,ENSG00000116584_ARHGEF2,ENSG00000116586_LAMTOR2,ENSG00000116604_MEF2D,ENSG00000116641_DOCK7,ENSG00000116649_SRM,ENSG00000116663_FBXO6,ENSG00000116667_C1orf21,ENSG00000116668_SWT1,ENSG00000116670_MAD2L2,ENSG00000116675_DNAJC6,ENSG00000116678_LEPR,ENSG00000116679_IVNS1ABP,ENSG00000116685_KIAA2013,ENSG00000116688_MFN2,ENSG00000116691_MIIP,ENSG00000116698_SMG7,ENSG00000116701_NCF2,ENSG00000116704_SLC35D1,ENSG00000116711_PLA2G4A,ENSG00000116717_GADD45A,ENSG00000116729_WLS,ENSG00000116731_PRDM2,ENSG00000116741_RGS2,ENSG00000116747_TROVE2,ENSG00000116750_UCHL5,ENSG00000116752_BCAS2,ENSG00000116754_SRSF11,ENSG00000116771_AGMAT,ENSG00000116774_OLFML3,ENSG00000116786_PLEKHM2,ENSG00000116791_CRYZ,ENSG00000116793_PHTF1,ENSG00000116809_ZBTB17,ENSG00000116815_CD58,ENSG00000116819_TFAP2E,ENSG00000116824_CD2,ENSG00000116830_TTF2,ENSG00000116852_KIF21B,ENSG00000116857_TMEM9,ENSG00000116863_ADPRHL2,ENSG00000116871_MAP7D1,ENSG00000116874_WARS2,ENSG00000116898_MRPS15,ENSG00000116903_EXOC8,ENSG00000116906_GNPAT,ENSG00000116918_TSNAX,ENSG00000116922_C1orf109,ENSG00000116954_RRAGC,ENSG00000116957_TBCE,ENSG00000116962_NID1,ENSG00000116977_LGALS8,ENSG00000116983_HPCAL4,ENSG00000116984_MTR,ENSG00000116985_BMP8B,ENSG00000116990_MYCL,ENSG00000116991_SIPA1L2,ENSG00000117000_RLF,ENSG00000117009_KMO,ENSG00000117010_ZNF684,ENSG00000117016_RIMS3,ENSG00000117020_AKT3,ENSG00000117036_ETV3,ENSG00000117054_ACADM,ENSG00000117090_SLAMF1,ENSG00000117091_CD48,ENSG00000117115_PADI2,ENSG00000117118_SDHB,ENSG00000117133_RPF1,ENSG00000117139_KDM5B,ENSG00000117143_UAP1,ENSG00000117151_CTBS,ENSG00000117153_KLHL12,ENSG00000117155_SSX2IP,ENSG00000117174_ZNHIT6,ENSG00000117222_RBBP5,ENSG00000117226_GBP3,ENSG00000117228_GBP1,ENSG00000117262_GPR89A,ENSG00000117280_RAB29,ENSG00000117281_CD160,ENSG00000117298_ECE1,ENSG00000117305_HMGCL,ENSG00000117308_GALE,ENSG00000117318_ID3,ENSG00000117322_CR2,ENSG00000117335_CD46,ENSG00000117360_PRPF3,ENSG00000117362_APH1A,ENSG00000117385_P3H1,ENSG00000117394_SLC2A1,ENSG00000117395_EBNA1BP2,ENSG00000117399_CDC20,ENSG00000117408_IPO13,ENSG00000117410_ATP6V0B,ENSG00000117411_B4GALT2,ENSG00000117419_ERI3,ENSG00000117448_AKR1A1,ENSG00000117450_PRDX1,ENSG00000117461_PIK3R3,ENSG00000117475_BLZF1,ENSG00000117479_SLC19A2,ENSG00000117480_FAAH,ENSG00000117481_NSUN4,ENSG00000117500_TMED5,ENSG00000117505_DR1,ENSG00000117523_PRRC2C,ENSG00000117528_ABCD3,ENSG00000117533_VAMP4,ENSG00000117543_DPH5,ENSG00000117560_FASLG,ENSG00000117569_PTBP2,ENSG00000117586_TNFSF4,ENSG00000117592_PRDX6,ENSG00000117593_DARS2,ENSG00000117597_DIEXF,ENSG00000117602_RCAN3,ENSG00000117614_SYF2,ENSG00000117616_RSRP1,ENSG00000117620_SLC35A3,ENSG00000117625_RCOR3,ENSG00000117632_STMN1,ENSG00000117640_MTFR1L,ENSG00000117643_MAN1C1,ENSG00000117650_NEK2,ENSG00000117676_RPS6KA1,ENSG00000117682_DHDDS,ENSG00000117691_NENF,ENSG00000117697_NSL1,ENSG00000117713_ARID1A,ENSG00000117724_CENPF,ENSG00000117748_RPA2,ENSG00000117751_PPP1R8,ENSG00000117758_STX12,ENSG00000117834_SLC5A9,ENSG00000117859_OSBPL9,ENSG00000117862_TXNDC12,ENSG00000117868_ESYT2,ENSG00000117877_CD3EAP,ENSG00000117899_MESDC2,ENSG00000117906_RCN2,ENSG00000117984_CTSD,ENSG00000118007_STAG1,ENSG00000118046_STK11,ENSG00000118058_KMT2A,ENSG00000118096_IFT46,ENSG00000118113_MMP8,ENSG00000118162_KPTN,ENSG00000118181_RPS25,ENSG00000118193_KIF14,ENSG00000118197_DDX59,ENSG00000118200_CAMSAP2,ENSG00000118217_ATF6,ENSG00000118242_MREG,ENSG00000118246_FASTKD2,ENSG00000118260_CREB1,ENSG00000118263_KLF7,ENSG00000118276_B4GALT6,ENSG00000118308_LRMP,ENSG00000118363_SPCS2,ENSG00000118369_USP35,ENSG00000118412_CASP8AP2,ENSG00000118418_HMGN3,ENSG00000118420_UBE3D,ENSG00000118432_CNR1,ENSG00000118454_ANKRD13C,ENSG00000118482_PHF3,ENSG00000118495_PLAGL1,ENSG00000118496_FBXO30,ENSG00000118503_TNFAIP3,ENSG00000118507_AKAP7,ENSG00000118508_RAB32,ENSG00000118513_MYB,ENSG00000118514_ALDH8A1,ENSG00000118515_SGK1,ENSG00000118518_RNF146,ENSG00000118520_ARG1,ENSG00000118564_FBXL5,ENSG00000118579_MED28,ENSG00000118596_SLC16A7,ENSG00000118600_TMEM5,ENSG00000118620_ZNF430,ENSG00000118640_VAMP8,ENSG00000118655_DCLRE1B,ENSG00000118680_MYL12B,ENSG00000118689_FOXO3,ENSG00000118690_ARMC2,ENSG00000118705_RPN2,ENSG00000118707_TGIF2,ENSG00000118762_PKD2,ENSG00000118777_ABCG2,ENSG00000118804_STBD1,ENSG00000118816_CCNI,ENSG00000118855_MFSD1,ENSG00000118873_RAB3GAP2,ENSG00000118894_EEF2KMT,ENSG00000118900_UBN1,ENSG00000118922_KLF12,ENSG00000118939_UCHL3,ENSG00000118960_HS1BP3,ENSG00000118961_LDAH,ENSG00000118965_WDR35,ENSG00000118971_CCND2,ENSG00000118985_ELL2,ENSG00000118997_DNAH7,ENSG00000119004_CYP20A1,ENSG00000119013_NDUFB3,ENSG00000119041_GTF3C3,ENSG00000119042_SATB2,ENSG00000119048_UBE2B,ENSG00000119121_TRPM6,ENSG00000119138_KLF9,ENSG00000119139_TJP2,ENSG00000119185_ITGB1BP1,ENSG00000119203_CPSF3,ENSG00000119231_SENP5,ENSG00000119242_CCDC92,ENSG00000119280_C1orf198,ENSG00000119285_HEATR1,ENSG00000119314_PTBP3,ENSG00000119318_RAD23B,ENSG00000119321_FKBP15,ENSG00000119326_CTNNAL1,ENSG00000119328_FAM206A,ENSG00000119333_WDR34,ENSG00000119335_SET,ENSG00000119383_PTPA,ENSG00000119392_GLE1,ENSG00000119396_RAB14,ENSG00000119397_CNTRL,ENSG00000119401_TRIM32,ENSG00000119402_FBXW2,ENSG00000119403_PHF19,ENSG00000119408_NEK6,ENSG00000119414_PPP6C,ENSG00000119421_NDUFA8,ENSG00000119431_HDHD3,ENSG00000119446_RBM18,ENSG00000119457_SLC46A2,ENSG00000119471_HSDL2,ENSG00000119487_MAPKAP1,ENSG00000119509_INVS,ENSG00000119514_GALNT12,ENSG00000119522_DENND1A,ENSG00000119523_ALG2,ENSG00000119535_CSF3R,ENSG00000119537_KDSR,ENSG00000119541_VPS4B,ENSG00000119559_C19orf25,ENSG00000119574_ZBTB45,ENSG00000119596_YLPM1,ENSG00000119599_DCAF4,ENSG00000119616_FCF1,ENSG00000119632_IFI27L2,ENSG00000119636_BBOF1,ENSG00000119638_NEK9,ENSG00000119640_ACYP1,ENSG00000119650_IFT43,ENSG00000119655_NPC2,ENSG00000119661_DNAL1,ENSG00000119669_IRF2BPL,ENSG00000119681_LTBP2,ENSG00000119682_AREL1,ENSG00000119684_MLH3,ENSG00000119685_TTLL5,ENSG00000119686_FLVCR2,ENSG00000119688_ABCD4,ENSG00000119689_DLST,ENSG00000119705_SLIRP,ENSG00000119707_RBM25,ENSG00000119711_ALDH6A1,ENSG00000119714_GPR68,ENSG00000119718_EIF2B2,ENSG00000119720_NRDE2,ENSG00000119723_COQ6,ENSG00000119725_ZNF410,ENSG00000119729_RHOQ,ENSG00000119737_GPR75,ENSG00000119760_SUPT7L,ENSG00000119772_DNMT3A,ENSG00000119777_TMEM214,ENSG00000119778_ATAD2B,ENSG00000119782_FKBP1B,ENSG00000119787_ATL2,ENSG00000119801_YPEL5,ENSG00000119812_FAM98A,ENSG00000119820_YIPF4,ENSG00000119844_AFTPH,ENSG00000119862_LGALSL,ENSG00000119866_BCL11A,ENSG00000119878_CRIPT,ENSG00000119899_SLC17A5,ENSG00000119900_OGFRL1,ENSG00000119906_SLF2,ENSG00000119912_IDE,ENSG00000119915_ELOVL3,ENSG00000119917_IFIT3,ENSG00000119922_IFIT2,ENSG00000119927_GPAM,ENSG00000119929_CUTC,ENSG00000119943_PYROXD2,ENSG00000119950_MXI1,ENSG00000119953_SMNDC1,ENSG00000119965_C10orf88,ENSG00000119969_HELLS,ENSG00000119977_TCTN3,ENSG00000119979_FAM45A,ENSG00000120008_WDR11,ENSG00000120029_C10orf76,ENSG00000120049_KCNIP2,ENSG00000120051_CFAP58,ENSG00000120053_GOT1,ENSG00000120063_GNA13,ENSG00000120071_KANSL1,ENSG00000120093_HOXB3,ENSG00000120129_DUSP1,ENSG00000120137_PANK3,ENSG00000120158_RCL1,ENSG00000120159_CAAP1,ENSG00000120162_MOB3B,ENSG00000120217_CD274,ENSG00000120253_NUP43,ENSG00000120254_MTHFD1L,ENSG00000120256_LRP11,ENSG00000120262_CCDC170,ENSG00000120265_PCMT1,ENSG00000120278_PLEKHG1,ENSG00000120279_MYCT1,ENSG00000120280_CXorf21,ENSG00000120306_CYSTM1,ENSG00000120314_WDR55,ENSG00000120318_ARAP3,ENSG00000120333_MRPS14,ENSG00000120334_CENPL,ENSG00000120370_GORAB,ENSG00000120437_ACAT2,ENSG00000120438_TCP1,ENSG00000120451_SNX19,ENSG00000120458_MSANTD2,ENSG00000120509_PDZD11,ENSG00000120519_SLC10A7,ENSG00000120526_NUDCD1,ENSG00000120533_ENY2,ENSG00000120539_MASTL,ENSG00000120594_PLXDC2,ENSG00000120616_EPC1,ENSG00000120647_CCDC77,ENSG00000120656_TAF12,ENSG00000120662_MTRF1,ENSG00000120675_DNAJC15,ENSG00000120685_PROSER1,ENSG00000120686_UFM1,ENSG00000120688_WBP4,ENSG00000120690_ELF1,ENSG00000120694_HSPH1,ENSG00000120696_KBTBD7,ENSG00000120697_ALG5,ENSG00000120699_EXOSC8,ENSG00000120705_ETF1,ENSG00000120708_TGFBI,ENSG00000120709_FAM53C,ENSG00000120725_SIL1,ENSG00000120727_PAIP2,ENSG00000120733_KDM3B,ENSG00000120742_SERP1,ENSG00000120756_PLS1,ENSG00000120784_ZFP30,ENSG00000120798_NR2C1,ENSG00000120800_UTP20,ENSG00000120802_TMPO,ENSG00000120805_ARL1,ENSG00000120832_MTERF2,ENSG00000120833_SOCS2,ENSG00000120837_NFYB,ENSG00000120860_CCDC53,ENSG00000120868_APAF1,ENSG00000120875_DUSP4,ENSG00000120885_CLU,ENSG00000120889_TNFRSF10B,ENSG00000120899_PTK2B,ENSG00000120910_PPP3CC,ENSG00000120913_PDLIM2,ENSG00000120915_EPHX2,ENSG00000120925_RNF170,ENSG00000120942_UBIAD1,ENSG00000120948_TARDBP,ENSG00000120949_TNFRSF8,ENSG00000120963_ZNF706,ENSG00000120992_LYPLA1,ENSG00000121022_COPS5,ENSG00000121039_RDH10,ENSG00000121057_AKAP1,ENSG00000121058_COIL,ENSG00000121060_TRIM25,ENSG00000121064_SCPEP1,ENSG00000121067_SPOP,ENSG00000121073_SLC35B1,ENSG00000121104_FAM117A,ENSG00000121152_NCAPH,ENSG00000121210_KIAA0922,ENSG00000121236_TRIM6,ENSG00000121274_PAPD5,ENSG00000121281_ADCY7,ENSG00000121289_CEP89,ENSG00000121297_TSHZ3,ENSG00000121310_ECHDC2,ENSG00000121316_PLBD1,ENSG00000121350_PYROXD1,ENSG00000121390_PSPC1,ENSG00000121406_ZNF549,ENSG00000121413_ZSCAN18,ENSG00000121417_ZNF211,ENSG00000121454_LHX4,ENSG00000121481_RNF2,ENSG00000121486_TRMT1L,ENSG00000121542_SEC22A,ENSG00000121552_CSTA,ENSG00000121570_DPPA4,ENSG00000121577_POPDC2,ENSG00000121578_B4GALT4,ENSG00000121579_NAA50,ENSG00000121594_CD80,ENSG00000121621_KIF18A,ENSG00000121644_DESI2,ENSG00000121671_CRY2,ENSG00000121680_PEX16,ENSG00000121691_CAT,ENSG00000121716_PILRB,ENSG00000121741_ZMYM2,ENSG00000121742_GJB6,ENSG00000121749_TBC1D15,ENSG00000121766_ZCCHC17,ENSG00000121774_KHDRBS1,ENSG00000121775_TMEM39B,ENSG00000121797_CCRL2,ENSG00000121807_CCR2,ENSG00000121851_POLR3GL,ENSG00000121858_TNFSF10,ENSG00000121864_ZNF639,ENSG00000121879_PIK3CA,ENSG00000121892_PDS5A,ENSG00000121895_TMEM156,ENSG00000121897_LIAS,ENSG00000121903_ZSCAN20,ENSG00000121931_LRIF1,ENSG00000121933_TMIGD3,ENSG00000121940_CLCC1,ENSG00000121957_GPSM2,ENSG00000121964_GTDC1,ENSG00000121966_CXCR4,ENSG00000121988_ZRANB3,ENSG00000121989_ACVR2A,ENSG00000122008_POLK,ENSG00000122025_FLT3,ENSG00000122026_RPL21,ENSG00000122033_MTIF3,ENSG00000122034_GTF3A,ENSG00000122035_RASL11A,ENSG00000122042_UBL3,ENSG00000122068_FYTTD1,ENSG00000122085_MTERF4,ENSG00000122122_SASH3,ENSG00000122126_OCRL,ENSG00000122140_MRPS2,ENSG00000122188_LAX1,ENSG00000122203_KIAA1191,ENSG00000122218_COPA,ENSG00000122223_CD244,ENSG00000122224_LY9,ENSG00000122257_RBBP6,ENSG00000122299_ZC3H7A,ENSG00000122335_SERAC1,ENSG00000122359_ANXA11,ENSG00000122376_FAM35A,ENSG00000122378_FAM213A,ENSG00000122390_NAA60,ENSG00000122406_RPL5,ENSG00000122417_ODF2L,ENSG00000122420_PTGFR,ENSG00000122435_TRMT13,ENSG00000122481_RWDD3,ENSG00000122482_ZNF644,ENSG00000122483_CCDC18,ENSG00000122484_RPAP2,ENSG00000122490_PQLC1,ENSG00000122507_BBS9,ENSG00000122512_PMS2,ENSG00000122515_ZMIZ2,ENSG00000122545_SEPT7,ENSG00000122547_EEPD1,ENSG00000122550_KLHL7,ENSG00000122557_HERPUD2,ENSG00000122565_CBX3,ENSG00000122566_HNRNPA2B1,ENSG00000122591_FAM126A,ENSG00000122641_INHBA,ENSG00000122642_FKBP9,ENSG00000122643_NT5C3A,ENSG00000122644_ARL4A,ENSG00000122674_CCZ1,ENSG00000122678_POLM,ENSG00000122687_MRM2,ENSG00000122692_SMU1,ENSG00000122694_GLIPR2,ENSG00000122696_SLC25A51,ENSG00000122705_CLTA,ENSG00000122707_RECK,ENSG00000122729_ACO1,ENSG00000122741_DCAF10,ENSG00000122779_TRIM24,ENSG00000122783_C7orf49,ENSG00000122786_CALD1,ENSG00000122861_PLAU,ENSG00000122862_SRGN,ENSG00000122873_CISD1,ENSG00000122882_ECD,ENSG00000122884_P4HA1,ENSG00000122912_SLC25A16,ENSG00000122952_ZWINT,ENSG00000122958_VPS26A,ENSG00000122965_RBM19,ENSG00000122966_CIT,ENSG00000122970_IFT81,ENSG00000122971_ACADS,ENSG00000122986_HVCN1,ENSG00000123064_DDX54,ENSG00000123066_MED13L,ENSG00000123080_CDKN2C,ENSG00000123091_RNF11,ENSG00000123096_SSPN,ENSG00000123104_ITPR2,ENSG00000123106_CCDC91,ENSG00000123119_NECAB1,ENSG00000123124_WWP1,ENSG00000123130_ACOT9,ENSG00000123131_PRDX4,ENSG00000123136_DDX39A,ENSG00000123143_PKN1,ENSG00000123144_C19orf43,ENSG00000123146_ADGRE5,ENSG00000123154_WDR83,ENSG00000123159_GIPC1,ENSG00000123178_SPRYD7,ENSG00000123179_EBPL,ENSG00000123191_ATP7B,ENSG00000123200_ZC3H13,ENSG00000123213_NLN,ENSG00000123219_CENPK,ENSG00000123240_OPTN,ENSG00000123268_ATF1,ENSG00000123297_TSFM,ENSG00000123329_ARHGAP9,ENSG00000123338_NCKAP1L,ENSG00000123349_PFDN5,ENSG00000123352_SPATS2,ENSG00000123353_ORMDL2,ENSG00000123360_PDE1B,ENSG00000123374_CDK2,ENSG00000123384_LRP1,ENSG00000123395_ATG101,ENSG00000123405_NFE2,ENSG00000123411_IKZF4,ENSG00000123415_SMUG1,ENSG00000123416_TUBA1B,ENSG00000123444_KBTBD4,ENSG00000123472_ATPAF1,ENSG00000123473_STIL,ENSG00000123485_HJURP,ENSG00000123505_AMD1,ENSG00000123545_NDUFAF4,ENSG00000123552_USP45,ENSG00000123562_MORF4L2,ENSG00000123575_FAM199X,ENSG00000123595_RAB9A,ENSG00000123600_METTL8,ENSG00000123607_TTC21B,ENSG00000123609_NMI,ENSG00000123610_TNFAIP6,ENSG00000123612_ACVR1C,ENSG00000123636_BAZ2B,ENSG00000123643_SLC36A1,ENSG00000123684_LPGAT1,ENSG00000123685_BATF3,ENSG00000123689_G0S2,ENSG00000123700_KCNJ2,ENSG00000123728_RAP2C,ENSG00000123737_EXOSC9,ENSG00000123739_PLA2G12A,ENSG00000123810_B9D2,ENSG00000123815_COQ8B,ENSG00000123836_PFKFB2,ENSG00000123838_C4BPA,ENSG00000123892_RAB38,ENSG00000123908_AGO2,ENSG00000123933_MXD4,ENSG00000123975_CKS2,ENSG00000123983_ACSL3,ENSG00000123989_CHPF,ENSG00000123992_DNPEP,ENSG00000124019_FAM124B,ENSG00000124067_SLC12A4,ENSG00000124074_ENKD1,ENSG00000124098_FAM210B,ENSG00000124102_PI3,ENSG00000124103_FAM209A,ENSG00000124104_SNX21,ENSG00000124107_SLPI,ENSG00000124120_TTPAL,ENSG00000124126_PREX1,ENSG00000124145_SDC4,ENSG00000124151_NCOA3,ENSG00000124155_PIGT,ENSG00000124160_NCOA5,ENSG00000124164_VAPB,ENSG00000124171_PARD6B,ENSG00000124172_ATP5E,ENSG00000124177_CHD6,ENSG00000124181_PLCG1,ENSG00000124193_SRSF6,ENSG00000124198_ARFGEF2,ENSG00000124201_ZNFX1,ENSG00000124203_ZNF831,ENSG00000124207_CSE1L,ENSG00000124209_RAB22A,ENSG00000124214_STAU1,ENSG00000124215_CDH26,ENSG00000124217_MOCS3,ENSG00000124222_STX16,ENSG00000124225_PMEPA1,ENSG00000124226_RNF114,ENSG00000124228_DDX27,ENSG00000124243_BCAS4,ENSG00000124256_ZBP1,ENSG00000124275_MTRR,ENSG00000124279_FASTKD3,ENSG00000124299_PEPD,ENSG00000124313_IQSEC2,ENSG00000124333_VAMP7,ENSG00000124356_STAMBP,ENSG00000124357_NAGK,ENSG00000124370_MCEE,ENSG00000124374_PAIP2B,ENSG00000124380_SNRNP27,ENSG00000124383_MPHOSPH10,ENSG00000124406_ATP8A1,ENSG00000124422_USP22,ENSG00000124444_ZNF576,ENSG00000124459_ZNF45,ENSG00000124469_CEACAM8,ENSG00000124486_USP9X,ENSG00000124491_F13A1,ENSG00000124496_TRERF1,ENSG00000124508_BTN2A2,ENSG00000124523_SIRT5,ENSG00000124532_MRS2,ENSG00000124535_WRNIP1,ENSG00000124541_RRP36,ENSG00000124562_SNRPC,ENSG00000124570_SERPINB6,ENSG00000124571_XPO5,ENSG00000124574_ABCC10,ENSG00000124575_HIST1H1D,ENSG00000124587_PEX6,ENSG00000124588_NQO2,ENSG00000124593_PRICKLE4,ENSG00000124596_OARD1,ENSG00000124602_UNC5CL,ENSG00000124608_AARS2,ENSG00000124614_RPS10,ENSG00000124635_HIST1H2BJ,ENSG00000124641_MED20,ENSG00000124659_TBCC,ENSG00000124688_MAD2L1BP,ENSG00000124702_KLHDC3,ENSG00000124713_GNMT,ENSG00000124731_TREM1,ENSG00000124733_MEA1,ENSG00000124762_CDKN1A,ENSG00000124766_SOX4,ENSG00000124767_GLO1,ENSG00000124772_CPNE5,ENSG00000124782_RREB1,ENSG00000124783_SSR1,ENSG00000124784_RIOK1,ENSG00000124785_NRN1,ENSG00000124786_SLC35B3,ENSG00000124787_RPP40,ENSG00000124788_ATXN1,ENSG00000124789_NUP153,ENSG00000124795_DEK,ENSG00000124802_EEF1E1,ENSG00000124813_RUNX2,ENSG00000124831_LRRFIP1,ENSG00000124882_EREG,ENSG00000124942_AHNAK,ENSG00000125037_EMC3,ENSG00000125089_SH3TC1,ENSG00000125107_CNOT1,ENSG00000125122_LRRC29,ENSG00000125124_BBS2,ENSG00000125148_MT2A,ENSG00000125149_C16orf70,ENSG00000125166_GOT2,ENSG00000125170_DOK4,ENSG00000125245_GPR18,ENSG00000125246_CLYBL,ENSG00000125247_TMTC4,ENSG00000125249_RAP2A,ENSG00000125257_ABCC4,ENSG00000125304_TM9SF2,ENSG00000125319_C17orf53,ENSG00000125347_IRF1,ENSG00000125351_UPF3B,ENSG00000125352_RNF113A,ENSG00000125354_SEPT6,ENSG00000125356_NDUFA1,ENSG00000125375_ATP5S,ENSG00000125384_PTGER2,ENSG00000125386_FAM193A,ENSG00000125388_GRK4,ENSG00000125430_HS3ST3B1,ENSG00000125434_SLC25A35,ENSG00000125445_MRPS7,ENSG00000125447_GGA3,ENSG00000125449_ARMC7,ENSG00000125450_NUP85,ENSG00000125454_SLC25A19,ENSG00000125457_MIF4GD,ENSG00000125458_NT5C,ENSG00000125482_TTF1,ENSG00000125484_GTF3C4,ENSG00000125485_DDX31,ENSG00000125503_PPP1R12C,ENSG00000125505_MBOAT7,ENSG00000125510_OPRL1,ENSG00000125520_SLC2A4RG,ENSG00000125534_PPDPF,ENSG00000125538_IL1B,ENSG00000125611_CHCHD5,ENSG00000125629_INSIG2,ENSG00000125630_POLR1B,ENSG00000125633_CCDC93,ENSG00000125637_PSD4,ENSG00000125650_PSPN,ENSG00000125651_GTF2F1,ENSG00000125652_ALKBH7,ENSG00000125656_CLPP,ENSG00000125676_THOC2,ENSG00000125686_MED1,ENSG00000125691_RPL23,ENSG00000125703_ATG4C,ENSG00000125730_C3,ENSG00000125731_SH2D3A,ENSG00000125733_TRIP10,ENSG00000125734_GPR108,ENSG00000125735_TNFSF14,ENSG00000125741_OPA3,ENSG00000125743_SNRPD2,ENSG00000125744_RTN2,ENSG00000125746_EML2,ENSG00000125753_VASP,ENSG00000125755_SYMPK,ENSG00000125772_GPCPD1,ENSG00000125775_SDCBP2,ENSG00000125779_PANK2,ENSG00000125810_CD93,ENSG00000125812_GZF1,ENSG00000125814_NAPB,ENSG00000125817_CENPB,ENSG00000125818_PSMF1,ENSG00000125821_DTD1,ENSG00000125826_RBCK1,ENSG00000125827_TMX4,ENSG00000125834_STK35,ENSG00000125835_SNRPB,ENSG00000125843_AP5S1,ENSG00000125844_RRBP1,ENSG00000125845_BMP2,ENSG00000125846_ZNF133,ENSG00000125863_MKKS,ENSG00000125868_DSTN,ENSG00000125870_SNRPB2,ENSG00000125871_MGME1,ENSG00000125875_TBC1D20,ENSG00000125877_ITPA,ENSG00000125885_MCM8,ENSG00000125898_FAM110A,ENSG00000125900_SIRPD,ENSG00000125901_MRPS26,ENSG00000125910_S1PR4,ENSG00000125912_NCLN,ENSG00000125944_HNRNPR,ENSG00000125945_ZNF436,ENSG00000125952_MAX,ENSG00000125962_ARMCX5,ENSG00000125967_NECAB3,ENSG00000125970_RALY,ENSG00000125971_DYNLRB1,ENSG00000125977_EIF2S2,ENSG00000125991_ERGIC3,ENSG00000125995_ROMO1,ENSG00000126001_CEP250,ENSG00000126003_PLAGL2,ENSG00000126005_MMP24-AS1,ENSG00000126012_KDM5C,ENSG00000126016_AMOT,ENSG00000126062_TMEM115,ENSG00000126067_PSMB2,ENSG00000126070_AGO3,ENSG00000126088_UROD,ENSG00000126091_ST3GAL3,ENSG00000126106_TMEM53,ENSG00000126107_HECTD3,ENSG00000126214_KLC1,ENSG00000126215_XRCC3,ENSG00000126216_TUBGCP3,ENSG00000126217_MCF2L,ENSG00000126226_PCID2,ENSG00000126246_IGFLR1,ENSG00000126247_CAPNS1,ENSG00000126254_RBM42,ENSG00000126261_UBA2,ENSG00000126262_FFAR2,ENSG00000126264_HCST,ENSG00000126267_COX6B1,ENSG00000126351_THRA,ENSG00000126353_CCR7,ENSG00000126391_FRMD8,ENSG00000126432_PRDX5,ENSG00000126453_BCL2L12,ENSG00000126456_IRF3,ENSG00000126457_PRMT1,ENSG00000126458_RRAS,ENSG00000126461_SCAF1,ENSG00000126464_PRR12,ENSG00000126522_ASL,ENSG00000126524_SBDS,ENSG00000126561_STAT5A,ENSG00000126581_BECN1,ENSG00000126602_TRAP1,ENSG00000126653_NSRP1,ENSG00000126698_DNAJC8,ENSG00000126705_AHDC1,ENSG00000126709_IFI6,ENSG00000126746_ZNF384,ENSG00000126749_EMG1,ENSG00000126756_UXT,ENSG00000126759_CFP,ENSG00000126767_ELK1,ENSG00000126768_TIMM17B,ENSG00000126773_PCNX4,ENSG00000126775_ATG14,ENSG00000126777_KTN1,ENSG00000126787_DLGAP5,ENSG00000126790_L3HYPDH,ENSG00000126803_HSPA2,ENSG00000126804_ZBTB1,ENSG00000126814_TRMT5,ENSG00000126821_SGPP1,ENSG00000126822_PLEKHG3,ENSG00000126858_RHOT1,ENSG00000126860_EVI2A,ENSG00000126861_OMG,ENSG00000126870_WDR60,ENSG00000126882_FAM78A,ENSG00000126883_NUP214,ENSG00000126903_SLC10A3,ENSG00000126934_MAP2K2,ENSG00000126945_HNRNPH2,ENSG00000126947_ARMCX1,ENSG00000126953_TIMM8A,ENSG00000126970_ZC4H2,ENSG00000127022_CANX,ENSG00000127054_CPSF3L,ENSG00000127080_IPPK,ENSG00000127081_ZNF484,ENSG00000127084_FGD3,ENSG00000127124_HIVEP3,ENSG00000127125_PPCS,ENSG00000127152_BCL11B,ENSG00000127184_COX7C,ENSG00000127191_TRAF2,ENSG00000127220_ABHD8,ENSG00000127249_ATP13A4,ENSG00000127311_HELB,ENSG00000127314_RAP1B,ENSG00000127328_RAB3IP,ENSG00000127334_DYRK2,ENSG00000127337_YEATS4,ENSG00000127362_TAS2R3,ENSG00000127364_TAS2R4,ENSG00000127399_LRRC61,ENSG00000127415_IDUA,ENSG00000127418_FGFRL1,ENSG00000127419_TMEM175,ENSG00000127445_PIN1,ENSG00000127452_FBXL12,ENSG00000127463_EMC1,ENSG00000127481_UBR4,ENSG00000127483_HP1BP3,ENSG00000127507_ADGRE2,ENSG00000127511_SIN3B,ENSG00000127526_SLC35E1,ENSG00000127527_EPS15L1,ENSG00000127528_KLF2,ENSG00000127540_UQCR11,ENSG00000127554_GFER,ENSG00000127580_WDR24,ENSG00000127586_CHTF18,ENSG00000127603_MACF1,ENSG00000127616_SMARCA4,ENSG00000127663_KDM4B,ENSG00000127666_TICAM1,ENSG00000127720_METTL25,ENSG00000127774_EMC6,ENSG00000127804_METTL16,ENSG00000127824_TUBA4A,ENSG00000127831_VIL1,ENSG00000127837_AAMP,ENSG00000127838_PNKD,ENSG00000127870_RNF6,ENSG00000127884_ECHS1,ENSG00000127903_ZNF835,ENSG00000127914_AKAP9,ENSG00000127920_GNG11,ENSG00000127922_SHFM1,ENSG00000127946_HIP1,ENSG00000127947_PTPN12,ENSG00000127948_POR,ENSG00000127951_FGL2,ENSG00000127952_STYXL1,ENSG00000127954_STEAP4,ENSG00000127955_GNAI1,ENSG00000127980_PEX1,ENSG00000127989_MTERF1,ENSG00000127993_RBM48,ENSG00000127995_CASD1,ENSG00000128000_ZNF780B,ENSG00000128011_LRFN1,ENSG00000128016_ZFP36,ENSG00000128039_SRD5A3,ENSG00000128050_PAICS,ENSG00000128059_PPAT,ENSG00000128159_TUBGCP6,ENSG00000128185_DGCR6L,ENSG00000128191_DGCR8,ENSG00000128203_ASPHD2,ENSG00000128228_SDF2L1,ENSG00000128245_YWHAH,ENSG00000128266_GNAZ,ENSG00000128268_MGAT3,ENSG00000128271_ADORA2A,ENSG00000128272_ATF4,ENSG00000128284_APOL3,ENSG00000128294_TPST2,ENSG00000128309_MPST,ENSG00000128311_TST,ENSG00000128335_APOL2,ENSG00000128340_RAC2,ENSG00000128383_APOBEC3A,ENSG00000128394_APOBEC3F,ENSG00000128463_EMC4,ENSG00000128487_SPECC1,ENSG00000128512_DOCK4,ENSG00000128513_POT1,ENSG00000128524_ATP6V1F,ENSG00000128534_LSM8,ENSG00000128536_CDHR3,ENSG00000128563_PRKRIP1,ENSG00000128578_STRIP2,ENSG00000128585_MKLN1,ENSG00000128590_DNAJB9,ENSG00000128594_LRRC4,ENSG00000128595_CALU,ENSG00000128596_CCDC136,ENSG00000128604_IRF5,ENSG00000128607_KLHDC10,ENSG00000128609_NDUFA5,ENSG00000128626_MRPS12,ENSG00000128641_MYO1B,ENSG00000128654_MTX2,ENSG00000128656_CHN1,ENSG00000128694_OSGEPL1,ENSG00000128699_ORMDL1,ENSG00000128708_HAT1,ENSG00000128731_HERC2,ENSG00000128739_SNRPN,ENSG00000128789_PSMG2,ENSG00000128791_TWSG1,ENSG00000128805_ARHGAP22,ENSG00000128815_WDFY4,ENSG00000128829_EIF2AK4,ENSG00000128872_TMOD2,ENSG00000128881_TTBK2,ENSG00000128891_C15orf57,ENSG00000128908_INO80,ENSG00000128915_ICE2,ENSG00000128918_ALDH1A2,ENSG00000128923_FAM63B,ENSG00000128928_IVD,ENSG00000128944_KNSTRN,ENSG00000128951_DUT,ENSG00000128973_CLN6,ENSG00000128989_ARPP19,ENSG00000129003_VPS13C,ENSG00000129007_CALML4,ENSG00000129038_LOXL1,ENSG00000129055_ANAPC13,ENSG00000129071_MBD4,ENSG00000129083_COPB1,ENSG00000129084_PSMA1,ENSG00000129103_SUMF2,ENSG00000129116_PALLD,ENSG00000129128_SPCS3,ENSG00000129158_SERGEF,ENSG00000129173_E2F8,ENSG00000129187_DCTD,ENSG00000129197_RPAIN,ENSG00000129219_PLD2,ENSG00000129235_TXNDC17,ENSG00000129245_FXR2,ENSG00000129250_KIF1C,ENSG00000129255_MPDU1,ENSG00000129292_PHF20L1,ENSG00000129295_LRRC6,ENSG00000129315_CCNT1,ENSG00000129317_PUS7L,ENSG00000129347_KRI1,ENSG00000129351_ILF3,ENSG00000129353_SLC44A2,ENSG00000129355_CDKN2D,ENSG00000129422_MTUS1,ENSG00000129450_SIGLEC9,ENSG00000129460_NGDN,ENSG00000129465_RIPK3,ENSG00000129467_ADCY4,ENSG00000129472_RAB2B,ENSG00000129473_BCL2L2,ENSG00000129480_DTD2,ENSG00000129484_PARP2,ENSG00000129493_HEATR5A,ENSG00000129515_SNX6,ENSG00000129518_EAPP,ENSG00000129521_EGLN3,ENSG00000129534_MIS18BP1,ENSG00000129535_NRL,ENSG00000129538_RNASE1,ENSG00000129559_NEDD8,ENSG00000129562_DAD1,ENSG00000129566_TEP1,ENSG00000129595_EPB41L4A,ENSG00000129625_REEP5,ENSG00000129636_ITFG1,ENSG00000129646_QRICH2,ENSG00000129657_SEC14L1,ENSG00000129667_RHBDF2,ENSG00000129675_ARHGEF6,ENSG00000129680_MAP7D3,ENSG00000129682_FGF13,ENSG00000129691_ASH2L,ENSG00000129696_TTI2,ENSG00000129749_CHRNA10,ENSG00000129757_CDKN1C,ENSG00000129810_SGO1,ENSG00000129824_RPS4Y1,ENSG00000129911_KLF16,ENSG00000129925_TMEM8A,ENSG00000129932_DOHH,ENSG00000129933_MAU2,ENSG00000129968_ABHD17A,ENSG00000129993_CBFA2T3,ENSG00000130021_PUDP,ENSG00000130023_ERMARD,ENSG00000130024_PHF10,ENSG00000130038_CRACR2A,ENSG00000130052_STARD8,ENSG00000130066_SAT1,ENSG00000130119_GNL3L,ENSG00000130150_MOSPD2,ENSG00000130159_ECSIT,ENSG00000130164_LDLR,ENSG00000130165_ELOF1,ENSG00000130175_PRKCSH,ENSG00000130177_CDC16,ENSG00000130193_THEM6,ENSG00000130202_NECTIN2,ENSG00000130204_TOMM40,ENSG00000130222_GADD45G,ENSG00000130227_XPO7,ENSG00000130244_FAM98C,ENSG00000130254_SAFB2,ENSG00000130255_RPL36,ENSG00000130270_ATP8B3,ENSG00000130299_GTPBP3,ENSG00000130300_PLVAP,ENSG00000130303_BST2,ENSG00000130304_SLC27A1,ENSG00000130305_NSUN5,ENSG00000130309_COLGALT1,ENSG00000130311_DDA1,ENSG00000130312_MRPL34,ENSG00000130313_PGLS,ENSG00000130332_LSM7,ENSG00000130338_TULP4,ENSG00000130340_SNX9,ENSG00000130347_RTN4IP1,ENSG00000130348_QRSL1,ENSG00000130349_C6orf203,ENSG00000130363_RSPH3,ENSG00000130382_MLLT1,ENSG00000130396_AFDN,ENSG00000130402_ACTN4,ENSG00000130413_STK33,ENSG00000130414_NDUFA10,ENSG00000130429_ARPC1B,ENSG00000130449_ZSWIM6,ENSG00000130475_FCHO1,ENSG00000130479_MAP1S,ENSG00000130487_KLHDC7B,ENSG00000130489_SCO2,ENSG00000130511_SSBP4,ENSG00000130517_PGPEP1,ENSG00000130518_KIAA1683,ENSG00000130520_LSM4,ENSG00000130522_JUND,ENSG00000130544_ZNF557,ENSG00000130559_CAMSAP1,ENSG00000130560_UBAC1,ENSG00000130589_HELZ2,ENSG00000130592_LSP1,ENSG00000130595_TNNT3,ENSG00000130598_TNNI2,ENSG00000130638_ATXN10,ENSG00000130640_TUBGCP2,ENSG00000130669_PAK4,ENSG00000130684_ZNF337,ENSG00000130695_CEP85,ENSG00000130699_TAF4,ENSG00000130703_OSBPL2,ENSG00000130706_ADRM1,ENSG00000130713_EXOSC2,ENSG00000130714_POMT1,ENSG00000130717_UCK1,ENSG00000130723_PRRC2B,ENSG00000130724_CHMP2A,ENSG00000130725_UBE2M,ENSG00000130726_TRIM28,ENSG00000130731_METTL26,ENSG00000130733_YIPF2,ENSG00000130734_ATG4D,ENSG00000130741_EIF2S3,ENSG00000130748_TMEM160,ENSG00000130749_ZC3H4,ENSG00000130755_GMFG,ENSG00000130758_MAP3K10,ENSG00000130764_LRRC47,ENSG00000130766_SESN2,ENSG00000130770_ATPIF1,ENSG00000130772_MED18,ENSG00000130775_THEMIS2,ENSG00000130779_CLIP1,ENSG00000130783_CCDC62,ENSG00000130787_HIP1R,ENSG00000130803_ZNF317,ENSG00000130811_EIF3G,ENSG00000130813_C19orf66,ENSG00000130816_DNMT1,ENSG00000130818_ZNF426,ENSG00000130821_SLC6A8,ENSG00000130826_DKC1,ENSG00000130827_PLXNA3,ENSG00000130830_MPP1,ENSG00000130844_ZNF331,ENSG00000130856_ZNF236,ENSG00000130881_LRP3,ENSG00000130921_C12orf65,ENSG00000130935_NOL11,ENSG00000130939_UBE4B,ENSG00000130940_CASZ1,ENSG00000130956_HABP4,ENSG00000130958_SLC35D2,ENSG00000130985_UBA1,ENSG00000130997_POLN,ENSG00000131013_PPIL4,ENSG00000131016_AKAP12,ENSG00000131018_SYNE1,ENSG00000131023_LATS1,ENSG00000131042_LILRB2,ENSG00000131043_AAR2,ENSG00000131051_RBM39,ENSG00000131061_ZNF341,ENSG00000131067_GGT7,ENSG00000131069_ACSS2,ENSG00000131089_ARHGEF9,ENSG00000131100_ATP6V1E1,ENSG00000131115_ZNF227,ENSG00000131116_ZNF428,ENSG00000131127_ZNF141,ENSG00000131143_COX4I1,ENSG00000131148_EMC8,ENSG00000131149_GSE1,ENSG00000131153_GINS2,ENSG00000131165_CHMP1A,ENSG00000131171_SH3BGRL,ENSG00000131174_COX7B,ENSG00000131187_F12,ENSG00000131188_PRR7,ENSG00000131196_NFATC1,ENSG00000131203_IDO1,ENSG00000131236_CAP1,ENSG00000131238_PPT1,ENSG00000131242_RAB11FIP4,ENSG00000131263_RLIM,ENSG00000131269_ABCB7,ENSG00000131323_TRAF3,ENSG00000131351_HAUS8,ENSG00000131355_ADGRE3,ENSG00000131368_MRPS25,ENSG00000131370_SH3BP5,ENSG00000131373_HACL1,ENSG00000131374_TBC1D5,ENSG00000131375_CAPN7,ENSG00000131378_RFTN1,ENSG00000131379_C3orf20,ENSG00000131381_RBSN,ENSG00000131389_SLC6A6,ENSG00000131408_NR1H2,ENSG00000131437_KIF3A,ENSG00000131446_MGAT1,ENSG00000131462_TUBG1,ENSG00000131467_PSME3,ENSG00000131469_RPL27,ENSG00000131470_PSMC3IP,ENSG00000131471_AOC3,ENSG00000131473_ACLY,ENSG00000131475_VPS25,ENSG00000131480_AOC2,ENSG00000131495_NDUFA2,ENSG00000131503_ANKHD1,ENSG00000131504_DIAPH1,ENSG00000131507_NDFIP1,ENSG00000131508_UBE2D2,ENSG00000131558_EXOC4,ENSG00000131584_ACAP3,ENSG00000131591_C1orf159,ENSG00000131626_PPFIA1,ENSG00000131634_TMEM204,ENSG00000131652_THOC6,ENSG00000131653_TRAF7,ENSG00000131669_NINJ1,ENSG00000131697_NPHP4,ENSG00000131724_IL13RA1,ENSG00000131725_WDR44,ENSG00000131732_ZCCHC9,ENSG00000131747_TOP2A,ENSG00000131748_STARD3,ENSG00000131759_RARA,ENSG00000131778_CHD1L,ENSG00000131779_PEX11B,ENSG00000131781_FMO5,ENSG00000131788_PIAS3,ENSG00000131791_PRKAB2,ENSG00000131828_PDHA1,ENSG00000131844_MCCC2,ENSG00000131845_ZNF304,ENSG00000131848_ZSCAN5A,ENSG00000131849_ZNF132,ENSG00000131871_SELENOS,ENSG00000131873_CHSY1,ENSG00000131876_SNRPA1,ENSG00000131899_LLGL1,ENSG00000131931_THAP1,ENSG00000131943_C19orf12,ENSG00000131944_FAAP24,ENSG00000131966_ACTR10,ENSG00000131979_GCH1,ENSG00000131981_LGALS3,ENSG00000132002_DNAJB1,ENSG00000132003_ZSWIM4,ENSG00000132004_FBXW9,ENSG00000132005_RFX1,ENSG00000132010_ZNF20,ENSG00000132017_DCAF15,ENSG00000132024_CC2D1A,ENSG00000132109_TRIM21,ENSG00000132122_SPATA6,ENSG00000132128_LRRC41,ENSG00000132141_CCT6B,ENSG00000132153_DHX30,ENSG00000132155_RAF1,ENSG00000132170_PPARG,ENSG00000132182_NUP210,ENSG00000132185_FCRLA,ENSG00000132196_HSD17B7,ENSG00000132199_ENOSF1,ENSG00000132205_EMILIN2,ENSG00000132254_ARFIP2,ENSG00000132256_TRIM5,ENSG00000132259_CNGA4,ENSG00000132274_TRIM22,ENSG00000132275_RRP8,ENSG00000132286_TIMM10B,ENSG00000132294_EFR3A,ENSG00000132300_PTCD3,ENSG00000132305_IMMT,ENSG00000132313_MRPL35,ENSG00000132323_ILKAP,ENSG00000132326_PER2,ENSG00000132330_SCLY,ENSG00000132334_PTPRE,ENSG00000132341_RAN,ENSG00000132356_PRKAA1,ENSG00000132357_CARD6,ENSG00000132359_RAP1GAP2,ENSG00000132361_CLUH,ENSG00000132376_INPP5K,ENSG00000132382_MYBBP1A,ENSG00000132383_RPA1,ENSG00000132386_SERPINF1,ENSG00000132388_UBE2G1,ENSG00000132394_EEFSEC,ENSG00000132405_TBC1D14,ENSG00000132406_TMEM128,ENSG00000132423_COQ3,ENSG00000132424_PNISR,ENSG00000132432_SEC61G,ENSG00000132434_LANCL2,ENSG00000132436_FIGNL1,ENSG00000132463_GRSF1,ENSG00000132465_JCHAIN,ENSG00000132466_ANKRD17,ENSG00000132467_UTP3,ENSG00000132470_ITGB4,ENSG00000132471_WBP2,ENSG00000132475_H3F3B,ENSG00000132478_UNK,ENSG00000132485_ZRANB2,ENSG00000132507_EIF5A,ENSG00000132510_KDM6B,ENSG00000132514_CLEC10A,ENSG00000132522_GPS2,ENSG00000132530_XAF1,ENSG00000132535_DLG4,ENSG00000132541_RIDA,ENSG00000132549_VPS13B,ENSG00000132570_PCBD2,ENSG00000132581_SDF2,ENSG00000132589_FLOT2,ENSG00000132591_ERAL1,ENSG00000132600_PRMT7,ENSG00000132603_NIP7,ENSG00000132604_TERF2,ENSG00000132612_VPS4A,ENSG00000132623_ANKEF1,ENSG00000132635_PCED1A,ENSG00000132640_BTBD3,ENSG00000132646_PCNA,ENSG00000132661_NXT1,ENSG00000132664_POLR3F,ENSG00000132669_RIN2,ENSG00000132670_PTPRA,ENSG00000132676_DAP3,ENSG00000132680_KIAA0907,ENSG00000132694_ARHGEF11,ENSG00000132704_FCRL2,ENSG00000132716_DCAF8,ENSG00000132718_SYT11,ENSG00000132740_IGHMBP2,ENSG00000132749_TESMIN,ENSG00000132763_MMACHC,ENSG00000132768_DPH2,ENSG00000132773_TOE1,ENSG00000132780_NASP,ENSG00000132781_MUTYH,ENSG00000132792_CTNNBL1,ENSG00000132801_ZSWIM3,ENSG00000132819_RBM38,ENSG00000132823_OSER1,ENSG00000132824_SERINC3,ENSG00000132825_PPP1R3D,ENSG00000132842_AP3B1,ENSG00000132849_PATJ,ENSG00000132879_FBXO44,ENSG00000132906_CASP9,ENSG00000132912_DCTN4,ENSG00000132932_ATP8A2,ENSG00000132950_ZMYM5,ENSG00000132952_USPL1,ENSG00000132953_XPO4,ENSG00000132963_POMP,ENSG00000132964_CDK8,ENSG00000132965_ALOX5AP,ENSG00000132970_WASF3,ENSG00000133026_MYH10,ENSG00000133027_PEMT,ENSG00000133028_SCO1,ENSG00000133030_MPRIP,ENSG00000133048_CHI3L1,ENSG00000133056_PIK3C2B,ENSG00000133059_DSTYK,ENSG00000133063_CHIT1,ENSG00000133065_SLC41A1,ENSG00000133069_TMCC2,ENSG00000133101_CCNA1,ENSG00000133103_COG6,ENSG00000133104_SPG20,ENSG00000133106_EPSTI1,ENSG00000133111_RFXAP,ENSG00000133112_TPT1,ENSG00000133114_GPALPP1,ENSG00000133116_KL,ENSG00000133119_RFC3,ENSG00000133121_STARD13,ENSG00000133131_MORC4,ENSG00000133134_BEX2,ENSG00000133138_TBC1D8B,ENSG00000133142_TCEAL4,ENSG00000133193_FAM104A,ENSG00000133195_SLC39A11,ENSG00000133216_EPHB2,ENSG00000133226_SRRM1,ENSG00000133243_BTBD2,ENSG00000133246_PRAM1,ENSG00000133247_KMT5C,ENSG00000133256_PDE6B,ENSG00000133265_HSPBP1,ENSG00000133275_CSNK1G2,ENSG00000133302_SLF1,ENSG00000133313_CNDP2,ENSG00000133316_WDR74,ENSG00000133317_LGALS12,ENSG00000133318_RTN3,ENSG00000133321_RARRES3,ENSG00000133393_FOPNL,ENSG00000133398_MED10,ENSG00000133422_MORC2,ENSG00000133424_LARGE1,ENSG00000133460_SLC2A11,ENSG00000133466_C1QTNF6,ENSG00000133477_FAM83F,ENSG00000133488_SEC14L4,ENSG00000133561_GIMAP6,ENSG00000133574_GIMAP4,ENSG00000133597_ADCK2,ENSG00000133606_MKRN1,ENSG00000133612_AGAP3,ENSG00000133619_KRBA1,ENSG00000133627_ACTR3B,ENSG00000133639_BTG1,ENSG00000133641_C12orf29,ENSG00000133657_ATP13A3,ENSG00000133678_TMEM254,ENSG00000133687_TMTC1,ENSG00000133703_KRAS,ENSG00000133704_IPO8,ENSG00000133706_LARS,ENSG00000133731_IMPA1,ENSG00000133739_LRRCC1,ENSG00000133740_E2F5,ENSG00000133742_CA1,ENSG00000133773_CCDC59,ENSG00000133789_SWAP70,ENSG00000133794_ARNTL,ENSG00000133800_LYVE1,ENSG00000133805_AMPD3,ENSG00000133808_MICALCL,ENSG00000133812_SBF2,ENSG00000133816_MICAL2,ENSG00000133818_RRAS2,ENSG00000133835_HSD17B4,ENSG00000133858_ZFC3H1,ENSG00000133872_SARAF,ENSG00000133874_RNF122,ENSG00000133884_DPF2,ENSG00000133895_MEN1,ENSG00000133935_C14orf1,ENSG00000133943_C14orf159,ENSG00000133961_NUMB,ENSG00000133962_CATSPERB,ENSG00000133983_COX16,ENSG00000133985_TTC9,ENSG00000133997_MED6,ENSG00000134001_EIF2S1,ENSG00000134007_ADAM20,ENSG00000134013_LOXL2,ENSG00000134014_ELP3,ENSG00000134028_ADAMDEC1,ENSG00000134030_CTIF,ENSG00000134046_MBD2,ENSG00000134049_IER3IP1,ENSG00000134056_MRPS36,ENSG00000134057_CCNB1,ENSG00000134058_CDK7,ENSG00000134061_CD180,ENSG00000134070_IRAK2,ENSG00000134072_CAMK1,ENSG00000134077_THUMPD3,ENSG00000134086_VHL,ENSG00000134107_BHLHE40,ENSG00000134108_ARL8B,ENSG00000134109_EDEM1,ENSG00000134121_CHL1,ENSG00000134146_DPH6,ENSG00000134152_KATNBL1,ENSG00000134153_EMC7,ENSG00000134186_PRPF38B,ENSG00000134198_TSPAN2,ENSG00000134202_GSTM3,ENSG00000134215_VAV3,ENSG00000134222_PSRC1,ENSG00000134242_PTPN22,ENSG00000134243_SORT1,ENSG00000134247_PTGFRN,ENSG00000134248_LAMTOR5,ENSG00000134250_NOTCH2,ENSG00000134255_CEPT1,ENSG00000134256_CD101,ENSG00000134262_AP4B1,ENSG00000134265_NAPG,ENSG00000134278_SPIRE1,ENSG00000134283_PPHLN1,ENSG00000134285_FKBP11,ENSG00000134287_ARF3,ENSG00000134291_TMEM106C,ENSG00000134294_SLC38A2,ENSG00000134308_YWHAQ,ENSG00000134313_KIDINS220,ENSG00000134317_GRHL1,ENSG00000134318_ROCK2,ENSG00000134321_RSAD2,ENSG00000134324_LPIN1,ENSG00000134326_CMPK2,ENSG00000134330_IAH1,ENSG00000134333_LDHA,ENSG00000134352_IL6ST,ENSG00000134369_NAV1,ENSG00000134371_CDC73,ENSG00000134375_TIMM17A,ENSG00000134419_RPS15A,ENSG00000134440_NARS,ENSG00000134444_KIAA1468,ENSG00000134452_FBXO18,ENSG00000134453_RBM17,ENSG00000134460_IL2RA,ENSG00000134461_ANKRD16,ENSG00000134463_ECHDC3,ENSG00000134470_IL15RA,ENSG00000134480_CCNH,ENSG00000134489_HRH4,ENSG00000134490_TMEM241,ENSG00000134516_DOCK2,ENSG00000134531_EMP1,ENSG00000134539_KLRD1,ENSG00000134545_KLRC1,ENSG00000134548_SPX,ENSG00000134571_MYBPC3,ENSG00000134574_DDB2,ENSG00000134575_ACP2,ENSG00000134590_FAM127A,ENSG00000134594_RAB33A,ENSG00000134597_RBMX2,ENSG00000134602_STK26,ENSG00000134627_PIWIL4,ENSG00000134644_PUM1,ENSG00000134668_SPOCD1,ENSG00000134684_YARS,ENSG00000134686_PHC2,ENSG00000134690_CDCA8,ENSG00000134697_GNL2,ENSG00000134698_AGO4,ENSG00000134709_HOOK1,ENSG00000134717_BTF3L4,ENSG00000134744_ZCCHC11,ENSG00000134748_PRPF38A,ENSG00000134755_DSC2,ENSG00000134758_RNF138,ENSG00000134759_ELP2,ENSG00000134779_TPGS2,ENSG00000134802_SLC43A3,ENSG00000134809_TIMM10,ENSG00000134815_DHX34,ENSG00000134824_FADS2,ENSG00000134825_TMEM258,ENSG00000134827_TCN1,ENSG00000134830_C5AR2,ENSG00000134851_TMEM165,ENSG00000134852_CLOCK,ENSG00000134864_GGACT,ENSG00000134882_UBAC2,ENSG00000134884_ARGLU1,ENSG00000134897_BIVM,ENSG00000134899_ERCC5,ENSG00000134900_TPP2,ENSG00000134905_CARS2,ENSG00000134909_ARHGAP32,ENSG00000134910_STT3A,ENSG00000134954_ETS1,ENSG00000134955_SLC37A2,ENSG00000134970_TMED7,ENSG00000134982_APC,ENSG00000134986_NREP,ENSG00000134987_WDR36,ENSG00000134996_OSTF1,ENSG00000135002_RFK,ENSG00000135018_UBQLN1,ENSG00000135040_NAA35,ENSG00000135045_C9orf40,ENSG00000135046_ANXA1,ENSG00000135047_CTSL,ENSG00000135048_TMEM2,ENSG00000135049_AGTPBP1,ENSG00000135052_GOLM1,ENSG00000135069_PSAT1,ENSG00000135070_ISCA1,ENSG00000135074_ADAM19,ENSG00000135077_HAVCR2,ENSG00000135083_CCNJL,ENSG00000135090_TAOK3,ENSG00000135093_USP30,ENSG00000135108_FBXO21,ENSG00000135114_OASL,ENSG00000135124_P2RX4,ENSG00000135127_BICDL1,ENSG00000135144_DTX1,ENSG00000135148_TRAFD1,ENSG00000135164_DMTF1,ENSG00000135185_TMEM243,ENSG00000135205_CCDC146,ENSG00000135211_TMEM60,ENSG00000135218_CD36,ENSG00000135241_PNPLA8,ENSG00000135245_HILPDA,ENSG00000135249_RINT1,ENSG00000135250_SRPK2,ENSG00000135269_TES,ENSG00000135272_MDFIC,ENSG00000135297_MTO1,ENSG00000135299_ANKRD6,ENSG00000135315_CEP162,ENSG00000135316_SYNCRIP,ENSG00000135317_SNX14,ENSG00000135318_NT5E,ENSG00000135334_AKIRIN2,ENSG00000135336_ORC3,ENSG00000135341_MAP3K7,ENSG00000135362_PRR5L,ENSG00000135363_LMO2,ENSG00000135365_PHF21A,ENSG00000135372_NAT10,ENSG00000135378_PRRG4,ENSG00000135387_CAPRIN1,ENSG00000135390_ATP5G2,ENSG00000135392_DNAJC14,ENSG00000135404_CD63,ENSG00000135407_AVIL,ENSG00000135414_GDF11,ENSG00000135424_ITGA7,ENSG00000135426_TESPA1,ENSG00000135437_RDH5,ENSG00000135439_AGAP2,ENSG00000135441_BLOC1S1,ENSG00000135446_CDK4,ENSG00000135451_TROAP,ENSG00000135452_TSPAN31,ENSG00000135457_TFCP2,ENSG00000135469_COQ10A,ENSG00000135473_PAN2,ENSG00000135476_ESPL1,ENSG00000135482_ZC3H10,ENSG00000135486_HNRNPA1,ENSG00000135503_ACVR1B,ENSG00000135506_OS9,ENSG00000135519_KCNH3,ENSG00000135521_LTV1,ENSG00000135525_MAP7,ENSG00000135535_CD164,ENSG00000135537_LACE1,ENSG00000135540_NHSL1,ENSG00000135541_AHI1,ENSG00000135587_SMPD2,ENSG00000135596_MICAL1,ENSG00000135597_REPS1,ENSG00000135604_STX11,ENSG00000135605_TEC,ENSG00000135617_PRADC1,ENSG00000135622_SEMA4F,ENSG00000135624_CCT7,ENSG00000135631_RAB11FIP5,ENSG00000135632_SMYD5,ENSG00000135636_DYSF,ENSG00000135637_CCDC142,ENSG00000135643_KCNMB4,ENSG00000135655_USP15,ENSG00000135677_GNS,ENSG00000135678_CPM,ENSG00000135679_MDM2,ENSG00000135686_KLHL36,ENSG00000135698_MPHOSPH6,ENSG00000135709_KIAA0513,ENSG00000135720_DYNC1LI2,ENSG00000135722_FBXL8,ENSG00000135723_FHOD1,ENSG00000135736_CCDC102A,ENSG00000135749_PCNX2,ENSG00000135763_URB2,ENSG00000135766_EGLN1,ENSG00000135775_COG2,ENSG00000135776_ABCB10,ENSG00000135778_NTPCR,ENSG00000135801_TAF5L,ENSG00000135821_GLUL,ENSG00000135823_STX6,ENSG00000135828_RNASEL,ENSG00000135829_DHX9,ENSG00000135837_CEP350,ENSG00000135838_NPL,ENSG00000135842_FAM129A,ENSG00000135845_PIGC,ENSG00000135862_LAMC1,ENSG00000135870_RC3H1,ENSG00000135898_GPR55,ENSG00000135899_SP110,ENSG00000135900_MRPL44,ENSG00000135905_DOCK10,ENSG00000135912_TTLL4,ENSG00000135913_USP37,ENSG00000135916_ITM2C,ENSG00000135919_SERPINE2,ENSG00000135924_DNAJB2,ENSG00000135926_TMBIM1,ENSG00000135929_CYP27A1,ENSG00000135930_EIF4E2,ENSG00000135932_CAB39,ENSG00000135940_COX5B,ENSG00000135945_REV1,ENSG00000135951_TSGA10,ENSG00000135953_MFSD9,ENSG00000135956_TMEM127,ENSG00000135960_EDAR,ENSG00000135966_TGFBRAP1,ENSG00000135968_GCC2,ENSG00000135972_MRPS9,ENSG00000135974_C2orf49,ENSG00000135976_ANKRD36,ENSG00000135999_EPC2,ENSG00000136003_ISCU,ENSG00000136010_ALDH1L2,ENSG00000136014_USP44,ENSG00000136021_SCYL2,ENSG00000136026_CKAP4,ENSG00000136040_PLXNC1,ENSG00000136044_APPL2,ENSG00000136045_PWP1,ENSG00000136048_DRAM1,ENSG00000136051_KIAA1033,ENSG00000136052_SLC41A2,ENSG00000136059_VILL,ENSG00000136068_FLNB,ENSG00000136098_NEK3,ENSG00000136100_VPS36,ENSG00000136104_RNASEH2B,ENSG00000136108_CKAP2,ENSG00000136111_TBC1D4,ENSG00000136122_BORA,ENSG00000136141_LRCH1,ENSG00000136143_SUCLA2,ENSG00000136144_RCBTB1,ENSG00000136146_MED4,ENSG00000136147_PHF11,ENSG00000136152_COG3,ENSG00000136153_LMO7,ENSG00000136156_ITM2B,ENSG00000136158_SPRY2,ENSG00000136159_NUDT15,ENSG00000136160_EDNRB,ENSG00000136161_RCBTB2,ENSG00000136167_LCP1,ENSG00000136169_SETDB2,ENSG00000136193_SCRN1,ENSG00000136197_C7orf25,ENSG00000136205_TNS3,ENSG00000136213_CHST12,ENSG00000136231_IGF2BP3,ENSG00000136238_RAC1,ENSG00000136240_KDELR2,ENSG00000136243_NUPL2,ENSG00000136247_ZDHHC4,ENSG00000136250_AOAH,ENSG00000136261_BZW2,ENSG00000136270_TBRG4,ENSG00000136271_DDX56,ENSG00000136273_HUS1,ENSG00000136279_DBNL,ENSG00000136280_CCM2,ENSG00000136286_MYO1G,ENSG00000136295_TTYH3,ENSG00000136305_CIDEB,ENSG00000136319_TTC5,ENSG00000136371_MTHFS,ENSG00000136379_ABHD17C,ENSG00000136381_IREB2,ENSG00000136383_ALPK3,ENSG00000136404_TM6SF1,ENSG00000136436_CALCOCO2,ENSG00000136444_RSAD1,ENSG00000136448_NMT1,ENSG00000136450_SRSF1,ENSG00000136451_VEZF1,ENSG00000136463_TACO1,ENSG00000136478_TEX2,ENSG00000136485_DCAF7,ENSG00000136490_LIMD2,ENSG00000136492_BRIP1,ENSG00000136504_KAT7,ENSG00000136514_RTP4,ENSG00000136518_ACTL6A,ENSG00000136521_NDUFB5,ENSG00000136522_MRPL47,ENSG00000136527_TRA2B,ENSG00000136536_MARCH7,ENSG00000136541_ERMN,ENSG00000136542_GALNT5,ENSG00000136560_TANK,ENSG00000136573_BLK,ENSG00000136603_SKIL,ENSG00000136628_EPRS,ENSG00000136630_HLX,ENSG00000136631_VPS45,ENSG00000136634_IL10,ENSG00000136636_KCTD3,ENSG00000136643_RPS6KC1,ENSG00000136682_CBWD2,ENSG00000136689_IL1RN,ENSG00000136699_SMPD4,ENSG00000136709_WDR33,ENSG00000136710_CCDC115,ENSG00000136715_SAP130,ENSG00000136717_BIN1,ENSG00000136718_IMP4,ENSG00000136720_HS6ST1,ENSG00000136731_UGGT1,ENSG00000136732_GYPC,ENSG00000136738_STAM,ENSG00000136754_ABI1,ENSG00000136758_YME1L1,ENSG00000136770_DNAJC1,ENSG00000136783_NIPSNAP3A,ENSG00000136802_LRRC8A,ENSG00000136807_CDK9,ENSG00000136810_TXN,ENSG00000136811_ODF2,ENSG00000136813_KIAA0368,ENSG00000136816_TOR1B,ENSG00000136819_C9orf78,ENSG00000136824_SMC2,ENSG00000136826_KLF4,ENSG00000136827_TOR1A,ENSG00000136828_RALGPS1,ENSG00000136830_FAM129B,ENSG00000136840_ST6GALNAC4,ENSG00000136842_TMOD1,ENSG00000136854_STXBP1,ENSG00000136856_SLC2A8,ENSG00000136861_CDK5RAP2,ENSG00000136866_ZFP37,ENSG00000136867_SLC31A2,ENSG00000136868_SLC31A1,ENSG00000136869_TLR4,ENSG00000136870_ZNF189,ENSG00000136874_STX17,ENSG00000136875_PRPF4,ENSG00000136877_FPGS,ENSG00000136878_USP20,ENSG00000136888_ATP6V1G1,ENSG00000136891_TEX10,ENSG00000136895_GARNL3,ENSG00000136897_MRPL50,ENSG00000136908_DPM2,ENSG00000136925_TSTD2,ENSG00000136929_HEMGN,ENSG00000136930_PSMB7,ENSG00000136932_TRMO,ENSG00000136933_RABEPK,ENSG00000136935_GOLGA1,ENSG00000136936_XPA,ENSG00000136937_NCBP1,ENSG00000136938_ANP32B,ENSG00000136940_PDCL,ENSG00000136942_RPL35,ENSG00000136950_ARPC5L,ENSG00000136960_ENPP2,ENSG00000136982_DSCC1,ENSG00000136986_DERL1,ENSG00000136997_MYC,ENSG00000136999_NOV,ENSG00000137038_TMEM261,ENSG00000137040_RANBP6,ENSG00000137054_POLR1E,ENSG00000137055_PLAA,ENSG00000137070_IL11RA,ENSG00000137073_UBAP2,ENSG00000137074_APTX,ENSG00000137075_RNF38,ENSG00000137076_TLN1,ENSG00000137078_SIT1,ENSG00000137100_DCTN3,ENSG00000137101_CD72,ENSG00000137106_GRHPR,ENSG00000137124_ALDH1B1,ENSG00000137133_HINT2,ENSG00000137145_DENND4C,ENSG00000137154_RPS6,ENSG00000137161_CNPY3,ENSG00000137168_PPIL1,ENSG00000137171_KLC4,ENSG00000137177_KIF13A,ENSG00000137185_ZSCAN9,ENSG00000137193_PIM1,ENSG00000137198_GMPR,ENSG00000137200_CMTR1,ENSG00000137207_YIPF3,ENSG00000137210_TMEM14B,ENSG00000137216_TMEM63B,ENSG00000137218_FRS3,ENSG00000137221_TJAP1,ENSG00000137261_KIAA0319,ENSG00000137265_IRF4,ENSG00000137266_SLC22A23,ENSG00000137267_TUBB2A,ENSG00000137269_LRRC1,ENSG00000137274_BPHL,ENSG00000137275_RIPK1,ENSG00000137288_UQCC2,ENSG00000137309_HMGA1,ENSG00000137310_TCF19,ENSG00000137312_FLOT1,ENSG00000137331_IER3,ENSG00000137337_MDC1,ENSG00000137338_PGBD1,ENSG00000137343_ATAT1,ENSG00000137364_TPMT,ENSG00000137393_RNF144B,ENSG00000137404_NRM,ENSG00000137409_MTCH1,ENSG00000137411_VARS2,ENSG00000137413_TAF8,ENSG00000137414_FAM8A1,ENSG00000137441_FGFBP2,ENSG00000137449_CPEB2,ENSG00000137460_FHDC1,ENSG00000137462_TLR2,ENSG00000137474_MYO7A,ENSG00000137478_FCHSD2,ENSG00000137486_ARRB1,ENSG00000137492_THAP12,ENSG00000137494_ANKRD42,ENSG00000137496_IL18BP,ENSG00000137497_NUMA1,ENSG00000137500_CCDC90B,ENSG00000137501_SYTL2,ENSG00000137502_RAB30,ENSG00000137504_CREBZF,ENSG00000137509_PRCP,ENSG00000137513_NARS2,ENSG00000137522_RNF121,ENSG00000137547_MRPL15,ENSG00000137563_GGH,ENSG00000137571_SLCO5A1,ENSG00000137574_TGS1,ENSG00000137575_SDCBP,ENSG00000137601_NEK1,ENSG00000137628_DDX60,ENSG00000137642_SORL1,ENSG00000137656_BUD13,ENSG00000137672_TRPC6,ENSG00000137692_DCUN1D5,ENSG00000137700_SLC37A4,ENSG00000137710_RDX,ENSG00000137713_PPP2R1B,ENSG00000137714_FDX1,ENSG00000137720_C11orf1,ENSG00000137752_CASP1,ENSG00000137757_CASP5,ENSG00000137760_ALKBH8,ENSG00000137764_MAP2K5,ENSG00000137767_SQRDL,ENSG00000137770_CTDSPL2,ENSG00000137776_SLTM,ENSG00000137801_THBS1,ENSG00000137802_MAPKBP1,ENSG00000137804_NUSAP1,ENSG00000137806_NDUFAF1,ENSG00000137807_KIF23,ENSG00000137812_KNL1,ENSG00000137814_HAUS2,ENSG00000137815_RTF1,ENSG00000137817_PARP6,ENSG00000137818_RPLP1,ENSG00000137822_TUBGCP4,ENSG00000137824_RMDN3,ENSG00000137831_UACA,ENSG00000137841_PLCB2,ENSG00000137842_TMEM62,ENSG00000137845_ADAM10,ENSG00000137869_CYP19A1,ENSG00000137871_ZNF280D,ENSG00000137876_RSL24D1,ENSG00000137877_SPTBN5,ENSG00000137880_GCHFR,ENSG00000137941_TTLL7,ENSG00000137942_FNBP1L,ENSG00000137944_KYAT3,ENSG00000137947_GTF2B,ENSG00000137955_RABGGTB,ENSG00000137959_IFI44L,ENSG00000137962_ARHGAP29,ENSG00000137965_IFI44,ENSG00000137992_DBT,ENSG00000137996_RTCA,ENSG00000138002_IFT172,ENSG00000138018_SELENOI,ENSG00000138029_HADHB,ENSG00000138030_KHK,ENSG00000138031_ADCY3,ENSG00000138032_PPM1B,ENSG00000138035_PNPT1,ENSG00000138036_DYNC2LI1,ENSG00000138050_THUMPD2,ENSG00000138061_CYP1B1,ENSG00000138069_RAB1A,ENSG00000138071_ACTR2,ENSG00000138073_PREB,ENSG00000138074_SLC5A6,ENSG00000138078_PREPL,ENSG00000138080_EMILIN1,ENSG00000138081_FBXO11,ENSG00000138085_ATRAID,ENSG00000138092_CENPO,ENSG00000138095_LRPPRC,ENSG00000138101_DTNB,ENSG00000138107_ACTR1A,ENSG00000138111_MFSD13A,ENSG00000138119_MYOF,ENSG00000138134_STAMBPL1,ENSG00000138138_ATAD1,ENSG00000138160_KIF11,ENSG00000138161_CUZD1,ENSG00000138166_DUSP5,ENSG00000138172_CALHM2,ENSG00000138175_ARL3,ENSG00000138180_CEP55,ENSG00000138182_KIF20B,ENSG00000138185_ENTPD1,ENSG00000138190_EXOC6,ENSG00000138231_DBR1,ENSG00000138246_DNAJC13,ENSG00000138279_ANXA7,ENSG00000138286_FAM149B1,ENSG00000138303_ASCC1,ENSG00000138326_RPS24,ENSG00000138336_TET1,ENSG00000138346_DNA2,ENSG00000138363_ATIC,ENSG00000138375_SMARCAL1,ENSG00000138376_BARD1,ENSG00000138378_STAT4,ENSG00000138380_CARF,ENSG00000138381_ASNSD1,ENSG00000138382_METTL5,ENSG00000138385_SSB,ENSG00000138386_NAB1,ENSG00000138398_PPIG,ENSG00000138399_FASTKD1,ENSG00000138411_HECW2,ENSG00000138413_IDH1,ENSG00000138430_OLA1,ENSG00000138433_CIR1,ENSG00000138434_SSFA2,ENSG00000138439_FAM117B,ENSG00000138442_WDR12,ENSG00000138443_ABI2,ENSG00000138448_ITGAV,ENSG00000138449_SLC40A1,ENSG00000138459_SLC35A5,ENSG00000138463_DIRC2,ENSG00000138468_SENP7,ENSG00000138495_COX17,ENSG00000138496_PARP9,ENSG00000138592_USP8,ENSG00000138593_SECISBP2L,ENSG00000138594_TMOD3,ENSG00000138600_SPPL2A,ENSG00000138604_GLCE,ENSG00000138606_SHF,ENSG00000138613_APH1B,ENSG00000138614_VWA9,ENSG00000138617_PARP16,ENSG00000138621_PPCDC,ENSG00000138623_SEMA7A,ENSG00000138629_UBL7,ENSG00000138639_ARHGAP24,ENSG00000138640_FAM13A,ENSG00000138641_HERC3,ENSG00000138642_HERC6,ENSG00000138646_HERC5,ENSG00000138658_ZGRF1,ENSG00000138660_AP1AR,ENSG00000138663_COPS4,ENSG00000138668_HNRNPD,ENSG00000138670_RASGEF1B,ENSG00000138674_SEC31A,ENSG00000138678_GPAT3,ENSG00000138685_FGF2,ENSG00000138686_BBS7,ENSG00000138688_KIAA1109,ENSG00000138698_RAP1GDS1,ENSG00000138709_LARP1B,ENSG00000138722_MMRN1,ENSG00000138735_PDE5A,ENSG00000138738_PRDM5,ENSG00000138744_NAAA,ENSG00000138750_NUP54,ENSG00000138756_BMP2K,ENSG00000138757_G3BP2,ENSG00000138758_SEPT11,ENSG00000138760_SCARB2,ENSG00000138764_CCNG2,ENSG00000138767_CNOT6L,ENSG00000138768_USO1,ENSG00000138772_ANXA3,ENSG00000138777_PPA2,ENSG00000138778_CENPE,ENSG00000138780_GSTCD,ENSG00000138785_INTS12,ENSG00000138794_CASP6,ENSG00000138795_LEF1,ENSG00000138796_HADH,ENSG00000138798_EGF,ENSG00000138801_PAPSS1,ENSG00000138802_SEC24B,ENSG00000138814_PPP3CA,ENSG00000138821_SLC39A8,ENSG00000138829_FBN2,ENSG00000138834_MAPK8IP3,ENSG00000138835_RGS3,ENSG00000138867_GUCD1,ENSG00000138942_RNF185,ENSG00000138964_PARVG,ENSG00000139044_B4GALNT3,ENSG00000139053_PDE6H,ENSG00000139055_ERP27,ENSG00000139083_ETV6,ENSG00000139112_GABARAPL1,ENSG00000139116_KIF21A,ENSG00000139117_CPNE8,ENSG00000139131_YARS2,ENSG00000139132_FGD4,ENSG00000139133_ALG10,ENSG00000139146_FAM60A,ENSG00000139154_AEBP2,ENSG00000139160_ETFBKMT,ENSG00000139163_ETNK1,ENSG00000139168_ZCRB1,ENSG00000139173_TMEM117,ENSG00000139174_PRICKLE1,ENSG00000139178_C1RL,ENSG00000139180_NDUFA9,ENSG00000139182_CLSTN3,ENSG00000139187_KLRG1,ENSG00000139190_VAMP1,ENSG00000139192_TAPBPL,ENSG00000139193_CD27,ENSG00000139197_PEX5,ENSG00000139211_AMIGO2,ENSG00000139218_SCAF11,ENSG00000139233_LLPH,ENSG00000139266_MARCH9,ENSG00000139278_GLIPR1,ENSG00000139289_PHLDA1,ENSG00000139291_TMEM19,ENSG00000139318_DUSP6,ENSG00000139323_POC1B,ENSG00000139324_TMTC3,ENSG00000139343_SNRPF,ENSG00000139344_AMDHD1,ENSG00000139350_NEDD1,ENSG00000139354_GAS2L3,ENSG00000139370_SLC15A4,ENSG00000139372_TDG,ENSG00000139405_RITA1,ENSG00000139428_MMAB,ENSG00000139433_GLTP,ENSG00000139436_GIT2,ENSG00000139437_TCHP,ENSG00000139496_NUP58,ENSG00000139505_MTMR6,ENSG00000139508_SLC46A3,ENSG00000139514_SLC7A1,ENSG00000139517_LNX2,ENSG00000139531_SUOX,ENSG00000139537_CCDC65,ENSG00000139546_TARBP2,ENSG00000139567_ACVRL1,ENSG00000139572_GPR84,ENSG00000139579_NABP2,ENSG00000139597_N4BP2L1,ENSG00000139613_SMARCC2,ENSG00000139618_BRCA2,ENSG00000139620_KANSL2,ENSG00000139624_CERS5,ENSG00000139625_MAP3K12,ENSG00000139626_ITGB7,ENSG00000139629_GALNT6,ENSG00000139631_CSAD,ENSG00000139636_LMBR1L,ENSG00000139637_C12orf10,ENSG00000139641_ESYT1,ENSG00000139644_TMBIM6,ENSG00000139645_ANKRD52,ENSG00000139651_ZNF740,ENSG00000139668_WDFY2,ENSG00000139675_HNRNPA1L2,ENSG00000139679_LPAR6,ENSG00000139684_ESD,ENSG00000139687_RB1,ENSG00000139697_SBNO1,ENSG00000139718_SETD1B,ENSG00000139719_VPS33A,ENSG00000139722_VPS37B,ENSG00000139725_RHOF,ENSG00000139726_DENR,ENSG00000139734_DIAPH3,ENSG00000139737_SLAIN1,ENSG00000139746_RBM26,ENSG00000139793_MBNL2,ENSG00000139826_ABHD13,ENSG00000139832_RAB20,ENSG00000139842_CUL4A,ENSG00000139890_REM2,ENSG00000139921_TMX1,ENSG00000139926_FRMD6,ENSG00000139946_PELI2,ENSG00000139970_RTN1,ENSG00000139974_SLC38A6,ENSG00000139977_NAA30,ENSG00000139990_DCAF5,ENSG00000140006_WDR89,ENSG00000140022_STON2,ENSG00000140025_EFCAB11,ENSG00000140030_GPR65,ENSG00000140043_PTGR2,ENSG00000140044_JDP2,ENSG00000140090_SLC24A4,ENSG00000140104_C14orf79,ENSG00000140105_WARS,ENSG00000140153_WDR20,ENSG00000140157_NIPA2,ENSG00000140199_SLC12A6,ENSG00000140259_MFAP1,ENSG00000140262_TCF12,ENSG00000140263_SORD,ENSG00000140264_SERF2,ENSG00000140265_ZSCAN29,ENSG00000140280_LYSMD2,ENSG00000140284_SLC27A2,ENSG00000140287_HDC,ENSG00000140299_BNIP2,ENSG00000140307_GTF2A2,ENSG00000140319_SRP14,ENSG00000140320_BAHD1,ENSG00000140326_CDAN1,ENSG00000140332_TLE3,ENSG00000140350_ANP32A,ENSG00000140365_COMMD4,ENSG00000140367_UBE2Q2,ENSG00000140368_PSTPIP1,ENSG00000140374_ETFA,ENSG00000140379_BCL2A1,ENSG00000140382_HMG20A,ENSG00000140386_SCAPER,ENSG00000140391_TSPAN3,ENSG00000140395_WDR61,ENSG00000140396_NCOA2,ENSG00000140398_NEIL1,ENSG00000140400_MAN2C1,ENSG00000140403_DNAJA4,ENSG00000140406_MESDC1,ENSG00000140416_TPM1,ENSG00000140443_IGF1R,ENSG00000140450_ARRDC4,ENSG00000140451_PIF1,ENSG00000140455_USP3,ENSG00000140463_BBS4,ENSG00000140464_PML,ENSG00000140470_ADAMTS17,ENSG00000140471_LINS1,ENSG00000140474_ULK3,ENSG00000140479_PCSK6,ENSG00000140497_SCAMP2,ENSG00000140511_HAPLN3,ENSG00000140521_POLG,ENSG00000140525_FANCI,ENSG00000140526_ABHD2,ENSG00000140534_TICRR,ENSG00000140543_DET1,ENSG00000140545_MFGE8,ENSG00000140548_ZNF710,ENSG00000140553_UNC45A,ENSG00000140563_MCTP2,ENSG00000140564_FURIN,ENSG00000140575_IQGAP1,ENSG00000140577_CRTC3,ENSG00000140598_EFL1,ENSG00000140612_SEC11A,ENSG00000140632_GLYR1,ENSG00000140650_PMM2,ENSG00000140678_ITGAX,ENSG00000140688_C16orf58,ENSG00000140691_ARMC5,ENSG00000140694_PARN,ENSG00000140718_FTO,ENSG00000140740_UQCRC2,ENSG00000140743_CDR2,ENSG00000140749_IGSF6,ENSG00000140750_ARHGAP17,ENSG00000140795_MYLK3,ENSG00000140829_DHX38,ENSG00000140830_TXNL4B,ENSG00000140836_ZFHX3,ENSG00000140848_CPNE2,ENSG00000140853_NLRC5,ENSG00000140854_KATNB1,ENSG00000140859_KIFC3,ENSG00000140876_NUDT7,ENSG00000140931_CMTM3,ENSG00000140932_CMTM2,ENSG00000140939_NOL3,ENSG00000140941_MAP1LC3B,ENSG00000140943_MBTPS1,ENSG00000140948_ZCCHC14,ENSG00000140950_TLDC1,ENSG00000140961_OSGIN1,ENSG00000140968_IRF8,ENSG00000140983_RHOT2,ENSG00000140987_ZSCAN32,ENSG00000140988_RPS2,ENSG00000140990_NDUFB10,ENSG00000140992_PDPK1,ENSG00000140993_TIGD7,ENSG00000140995_DEF8,ENSG00000141002_TCF25,ENSG00000141012_GALNS,ENSG00000141013_GAS8,ENSG00000141026_MED9,ENSG00000141027_NCOR1,ENSG00000141030_COPS3,ENSG00000141034_GID4,ENSG00000141040_ZNF287,ENSG00000141068_KSR1,ENSG00000141076_UTP4,ENSG00000141084_RANBP10,ENSG00000141096_DPEP3,ENSG00000141098_GFOD2,ENSG00000141101_NOB1,ENSG00000141127_PRPSAP2,ENSG00000141179_PCTP,ENSG00000141219_C17orf80,ENSG00000141232_TOB1,ENSG00000141252_VPS53,ENSG00000141258_SGSM2,ENSG00000141279_NPEPPS,ENSG00000141293_SKAP1,ENSG00000141295_SCRN2,ENSG00000141298_SSH2,ENSG00000141337_ARSG,ENSG00000141349_G6PC3,ENSG00000141367_CLTC,ENSG00000141376_BCAS3,ENSG00000141378_PTRH2,ENSG00000141380_SS18,ENSG00000141384_TAF4B,ENSG00000141385_AFG3L2,ENSG00000141401_IMPA2,ENSG00000141404_GNAL,ENSG00000141424_SLC39A6,ENSG00000141425_RPRD1A,ENSG00000141428_C18orf21,ENSG00000141429_GALNT1,ENSG00000141446_ESCO1,ENSG00000141447_OSBPL1A,ENSG00000141452_C18orf8,ENSG00000141456_PELP1,ENSG00000141458_NPC1,ENSG00000141469_SLC14A1,ENSG00000141480_ARRB2,ENSG00000141497_ZMYND15,ENSG00000141499_WRAP53,ENSG00000141503_MINK1,ENSG00000141504_SAT2,ENSG00000141505_ASGR1,ENSG00000141506_PIK3R5,ENSG00000141510_TP53,ENSG00000141522_ARHGDIA,ENSG00000141524_TMC6,ENSG00000141526_SLC16A3,ENSG00000141540_TTYH2,ENSG00000141543_EIF4A3,ENSG00000141551_CSNK1D,ENSG00000141552_ANAPC11,ENSG00000141556_TBCD,ENSG00000141560_FN3KRP,ENSG00000141562_NARF,ENSG00000141564_RPTOR,ENSG00000141568_FOXK2,ENSG00000141569_TRIM65,ENSG00000141570_CBX8,ENSG00000141574_SECTM1,ENSG00000141576_RNF157,ENSG00000141577_CEP131,ENSG00000141580_WDR45B,ENSG00000141582_CBX4,ENSG00000141622_RNF165,ENSG00000141627_DYM,ENSG00000141642_ELAC1,ENSG00000141644_MBD1,ENSG00000141646_SMAD4,ENSG00000141664_ZCCHC2,ENSG00000141682_PMAIP1,ENSG00000141698_NT5C3B,ENSG00000141699_FAM134C,ENSG00000141736_ERBB2,ENSG00000141741_MIEN1,ENSG00000141759_TXNL4A,ENSG00000141837_CACNA1A,ENSG00000141854_MISP3,ENSG00000141858_SAMD1,ENSG00000141867_BRD4,ENSG00000141873_SLC39A3,ENSG00000141905_NFIC,ENSG00000141933_TPGS1,ENSG00000141956_PRDM15,ENSG00000141959_PFKL,ENSG00000141965_FEM1A,ENSG00000141968_VAV1,ENSG00000141971_MVB12A,ENSG00000141985_SH3GL1,ENSG00000141994_DUS3L,ENSG00000142002_DPP9,ENSG00000142039_CCDC97,ENSG00000142046_TMEM91,ENSG00000142065_ZFP14,ENSG00000142082_SIRT3,ENSG00000142089_IFITM3,ENSG00000142102_PGGHG,ENSG00000142166_IFNAR1,ENSG00000142168_SOD1,ENSG00000142173_COL6A2,ENSG00000142185_TRPM2,ENSG00000142186_SCYL1,ENSG00000142188_TMEM50B,ENSG00000142192_APP,ENSG00000142197_DOPEY2,ENSG00000142207_URB1,ENSG00000142208_AKT1,ENSG00000142227_EMP3,ENSG00000142230_SAE1,ENSG00000142252_GEMIN7,ENSG00000142303_ADAMTS10,ENSG00000142327_RNPEPL1,ENSG00000142330_CAPN10,ENSG00000142347_MYO1F,ENSG00000142396_ERVK3-1,ENSG00000142405_NLRP12,ENSG00000142409_ZNF787,ENSG00000142444_TIMM29,ENSG00000142453_CARM1,ENSG00000142459_EVI5L,ENSG00000142507_PSMB6,ENSG00000142512_SIGLEC10,ENSG00000142528_ZNF473,ENSG00000142534_RPS11,ENSG00000142541_RPL13A,ENSG00000142544_CTU1,ENSG00000142546_NOSIP,ENSG00000142552_RCN3,ENSG00000142556_ZNF614,ENSG00000142583_SLC2A5,ENSG00000142599_RERE,ENSG00000142632_ARHGEF19,ENSG00000142634_EFHD2,ENSG00000142655_PEX14,ENSG00000142657_PGD,ENSG00000142669_SH3BGRL3,ENSG00000142676_RPL11,ENSG00000142684_ZNF593,ENSG00000142686_C1orf216,ENSG00000142687_KIAA0319L,ENSG00000142694_EVA1B,ENSG00000142731_PLK4,ENSG00000142733_MAP3K6,ENSG00000142751_GPN2,ENSG00000142765_SYTL1,ENSG00000142784_WDTC1,ENSG00000142794_NBPF3,ENSG00000142856_ITGB3BP,ENSG00000142864_SERBP1,ENSG00000142867_BCL10,ENSG00000142875_PRKACB,ENSG00000142892_PIGK,ENSG00000142937_RPS8,ENSG00000142945_KIF2C,ENSG00000142949_PTPRF,ENSG00000142961_MOB3C,ENSG00000143013_LMO4,ENSG00000143033_MTF2,ENSG00000143067_ZNF697,ENSG00000143079_CTTNBP2NL,ENSG00000143093_STRIP1,ENSG00000143106_PSMA5,ENSG00000143110_C1orf162,ENSG00000143119_CD53,ENSG00000143127_ITGA10,ENSG00000143149_ALDH9A1,ENSG00000143153_ATP1B1,ENSG00000143155_TIPRL,ENSG00000143156_NME7,ENSG00000143157_POGK,ENSG00000143158_MPC2,ENSG00000143162_CREG1,ENSG00000143164_DCAF6,ENSG00000143167_GPA33,ENSG00000143178_TBX19,ENSG00000143179_UCK2,ENSG00000143183_TMCO1,ENSG00000143190_POU2F1,ENSG00000143198_MGST3,ENSG00000143199_ADCY10,ENSG00000143207_RFWD2,ENSG00000143222_UFC1,ENSG00000143224_PPOX,ENSG00000143226_FCGR2A,ENSG00000143228_NUF2,ENSG00000143252_SDHC,ENSG00000143256_PFDN2,ENSG00000143258_USP21,ENSG00000143294_PRCC,ENSG00000143297_FCRL5,ENSG00000143303_RRNAD1,ENSG00000143314_MRPL24,ENSG00000143315_PIGM,ENSG00000143319_ISG20L2,ENSG00000143321_HDGF,ENSG00000143322_ABL2,ENSG00000143324_XPR1,ENSG00000143337_TOR1AIP1,ENSG00000143341_HMCN1,ENSG00000143344_RGL1,ENSG00000143353_LYPLAL1,ENSG00000143363_PRUNE1,ENSG00000143365_RORC,ENSG00000143367_TUFT1,ENSG00000143368_SF3B4,ENSG00000143373_ZNF687,ENSG00000143374_TARS2,ENSG00000143376_SNX27,ENSG00000143379_SETDB1,ENSG00000143382_ADAMTSL4,ENSG00000143384_MCL1,ENSG00000143387_CTSK,ENSG00000143390_RFX5,ENSG00000143393_PI4KB,ENSG00000143398_PIP5K1A,ENSG00000143401_ANP32E,ENSG00000143409_FAM63A,ENSG00000143416_SELENBP1,ENSG00000143418_CERS2,ENSG00000143420_ENSA,ENSG00000143436_MRPL9,ENSG00000143437_ARNT,ENSG00000143442_POGZ,ENSG00000143452_HORMAD1,ENSG00000143457_GOLPH3L,ENSG00000143458_GABPB2,ENSG00000143476_DTL,ENSG00000143479_DYRK3,ENSG00000143486_EIF2D,ENSG00000143493_INTS7,ENSG00000143498_TAF1A,ENSG00000143499_SMYD2,ENSG00000143507_DUSP10,ENSG00000143514_TP53BP2,ENSG00000143515_ATP8B2,ENSG00000143537_ADAM15,ENSG00000143543_JTB,ENSG00000143545_RAB13,ENSG00000143546_S100A8,ENSG00000143549_TPM3,ENSG00000143552_NUP210L,ENSG00000143553_SNAPIN,ENSG00000143554_SLC27A3,ENSG00000143569_UBAP2L,ENSG00000143570_SLC39A1,ENSG00000143575_HAX1,ENSG00000143578_CREB3L4,ENSG00000143595_AQP10,ENSG00000143612_C1orf43,ENSG00000143614_GATAD2B,ENSG00000143621_ILF2,ENSG00000143622_RIT1,ENSG00000143624_INTS3,ENSG00000143633_C1orf131,ENSG00000143641_GALNT2,ENSG00000143643_TTC13,ENSG00000143653_SCCPDH,ENSG00000143669_LYST,ENSG00000143674_RP5-862P8.2,ENSG00000143702_CEP170,ENSG00000143727_ACP1,ENSG00000143740_SNAP47,ENSG00000143742_SRP9,ENSG00000143748_NVL,ENSG00000143751_SDE2,ENSG00000143753_DEGS1,ENSG00000143756_FBXO28,ENSG00000143761_ARF1,ENSG00000143771_CNIH4,ENSG00000143772_ITPKB,ENSG00000143774_GUK1,ENSG00000143776_CDC42BPA,ENSG00000143786_CNIH3,ENSG00000143793_C1orf35,ENSG00000143797_MBOAT2,ENSG00000143799_PARP1,ENSG00000143801_PSEN2,ENSG00000143811_PYCR2,ENSG00000143815_LBR,ENSG00000143847_PPFIA4,ENSG00000143851_PTPN7,ENSG00000143862_ARL8A,ENSG00000143869_GDF7,ENSG00000143870_PDIA6,ENSG00000143878_RHOB,ENSG00000143889_HNRNPLL,ENSG00000143891_GALM,ENSG00000143919_CAMKMT,ENSG00000143924_EML4,ENSG00000143933_CALM2,ENSG00000143942_CHAC2,ENSG00000143947_RPS27A,ENSG00000143951_WDPCP,ENSG00000143952_VPS54,ENSG00000143970_ASXL2,ENSG00000143971_ETAA1,ENSG00000143977_SNRPG,ENSG00000143995_MEIS1,ENSG00000144021_CIAO1,ENSG00000144026_ZNF514,ENSG00000144028_SNRNP200,ENSG00000144029_MRPS5,ENSG00000144034_TPRKB,ENSG00000144036_EXOC6B,ENSG00000144040_SFXN5,ENSG00000144043_TEX261,ENSG00000144048_DUSP11,ENSG00000144115_THNSL2,ENSG00000144118_RALB,ENSG00000144120_TMEM177,ENSG00000144130_NT5DC4,ENSG00000144134_RABL2A,ENSG00000144136_SLC20A1,ENSG00000144152_FBLN7,ENSG00000144161_ZC3H8,ENSG00000144182_LIPT1,ENSG00000144214_LYG1,ENSG00000144218_AFF3,ENSG00000144224_UBXN4,ENSG00000144228_SPOPL,ENSG00000144231_POLR2D,ENSG00000144233_AMMECR1L,ENSG00000144283_PKP4,ENSG00000144290_SLC4A10,ENSG00000144306_SCRN3,ENSG00000144320_LNPK,ENSG00000144354_CDCA7,ENSG00000144357_UBR3,ENSG00000144381_HSPD1,ENSG00000144395_CCDC150,ENSG00000144401_METTL21A,ENSG00000144407_PTH2R,ENSG00000144426_NBEAL1,ENSG00000144445_KANSL1L,ENSG00000144451_SPAG16,ENSG00000144455_SUMF1,ENSG00000144468_RHBDD1,ENSG00000144476_ACKR3,ENSG00000144485_HES6,ENSG00000144504_ANKMY1,ENSG00000144524_COPS7B,ENSG00000144535_DIS3L2,ENSG00000144554_FANCD2,ENSG00000144559_TAMM41,ENSG00000144560_VGLL4,ENSG00000144566_RAB5A,ENSG00000144567_FAM134A,ENSG00000144579_CTDSP1,ENSG00000144580_CNOT9,ENSG00000144589_STK11IP,ENSG00000144591_GMPPA,ENSG00000144597_EAF1,ENSG00000144635_DYNC1LI1,ENSG00000144645_OSBPL10,ENSG00000144647_POMGNT2,ENSG00000144655_CSRNP1,ENSG00000144659_SLC25A38,ENSG00000144668_ITGA9,ENSG00000144674_GOLGA4,ENSG00000144677_CTDSPL,ENSG00000144711_IQSEC1,ENSG00000144713_RPL32,ENSG00000144736_SHQ1,ENSG00000144741_SLC25A26,ENSG00000144744_UBA3,ENSG00000144746_ARL6IP5,ENSG00000144747_TMF1,ENSG00000144749_LRIG1,ENSG00000144791_LIMD1,ENSG00000144792_ZNF660,ENSG00000144802_NFKBIZ,ENSG00000144815_NXPE3,ENSG00000144824_PHLDB2,ENSG00000144827_ABHD10,ENSG00000144840_RABL3,ENSG00000144843_ADPRH,ENSG00000144848_ATG3,ENSG00000144867_SRPRB,ENSG00000144893_MED12L,ENSG00000144895_EIF2A,ENSG00000144909_OSBPL11,ENSG00000144935_TRPC1,ENSG00000144959_NCEH1,ENSG00000145012_LPP,ENSG00000145016_RUBCN,ENSG00000145022_TCTA,ENSG00000145041_DCAF1,ENSG00000145050_MANF,ENSG00000145088_EAF2,ENSG00000145191_EIF2B5,ENSG00000145194_ECE2,ENSG00000145214_DGKQ,ENSG00000145216_FIP1L1,ENSG00000145220_LYAR,ENSG00000145241_CENPC,ENSG00000145244_CORIN,ENSG00000145246_ATP10D,ENSG00000145247_OCIAD2,ENSG00000145287_PLAC8,ENSG00000145293_ENOPH1,ENSG00000145331_TRMT10A,ENSG00000145332_KLHL8,ENSG00000145335_SNCA,ENSG00000145337_PYURF,ENSG00000145348_TBCK,ENSG00000145349_CAMK2D,ENSG00000145354_CISD2,ENSG00000145365_TIFA,ENSG00000145375_SPATA5,ENSG00000145386_CCNA2,ENSG00000145388_METTL14,ENSG00000145390_USP53,ENSG00000145391_SETD7,ENSG00000145414_NAF1,ENSG00000145416_MARCH1,ENSG00000145425_RPS3A,ENSG00000145428_RNF175,ENSG00000145431_PDGFC,ENSG00000145439_CBR4,ENSG00000145476_CYP4V2,ENSG00000145491_ROPN1L,ENSG00000145494_NDUFS6,ENSG00000145495_MARCH6,ENSG00000145545_SRD5A1,ENSG00000145555_MYO10,ENSG00000145569_FAM105A,ENSG00000145592_RPL37,ENSG00000145604_SKP2,ENSG00000145632_PLK2,ENSG00000145649_GZMA,ENSG00000145675_PIK3R1,ENSG00000145685_LHFPL2,ENSG00000145687_SSBP2,ENSG00000145703_IQGAP2,ENSG00000145708_CRHBP,ENSG00000145715_RASA1,ENSG00000145723_GIN1,ENSG00000145725_PPIP5K2,ENSG00000145730_PAM,ENSG00000145734_BDP1,ENSG00000145736_GTF2H2,ENSG00000145740_SLC30A5,ENSG00000145741_BTF3,ENSG00000145743_FBXL17,ENSG00000145779_TNFAIP8,ENSG00000145780_FEM1C,ENSG00000145781_COMMD10,ENSG00000145782_ATG12,ENSG00000145817_YIPF5,ENSG00000145819_ARHGAP26,ENSG00000145833_DDX46,ENSG00000145860_RNF145,ENSG00000145868_FBXO38,ENSG00000145882_PCYOX1L,ENSG00000145901_TNIP1,ENSG00000145907_G3BP1,ENSG00000145908_ZNF300,ENSG00000145911_N4BP3,ENSG00000145912_NHP2,ENSG00000145916_RMND5B,ENSG00000145919_BOD1,ENSG00000145936_KCNMB1,ENSG00000145945_FAM50B,ENSG00000145949_MYLK4,ENSG00000145979_TBC1D7,ENSG00000145982_FARS2,ENSG00000145990_GFOD1,ENSG00000145996_CDKAL1,ENSG00000146007_ZMAT2,ENSG00000146021_KLHL3,ENSG00000146054_TRIM7,ENSG00000146063_TRIM41,ENSG00000146066_HIGD2A,ENSG00000146067_FAM193B,ENSG00000146070_PLA2G7,ENSG00000146083_RNF44,ENSG00000146085_MUT,ENSG00000146094_DOK3,ENSG00000146109_ABT1,ENSG00000146112_PPP1R18,ENSG00000146122_DAAM2,ENSG00000146143_PRIM2,ENSG00000146166_LGSN,ENSG00000146192_FGD2,ENSG00000146223_RPL7L1,ENSG00000146232_NFKBIE,ENSG00000146243_IRAK1BP1,ENSG00000146247_PHIP,ENSG00000146263_MMS22L,ENSG00000146278_PNRC1,ENSG00000146281_PM20D2,ENSG00000146282_RARS2,ENSG00000146285_SCML4,ENSG00000146350_TBC1D32,ENSG00000146373_RNF217,ENSG00000146376_ARHGAP18,ENSG00000146386_ABRACL,ENSG00000146409_SLC18B1,ENSG00000146410_MTFR2,ENSG00000146414_SHPRH,ENSG00000146416_AIG1,ENSG00000146425_DYNLT1,ENSG00000146426_TIAM2,ENSG00000146433_TMEM181,ENSG00000146457_WTAP,ENSG00000146463_ZMYM4,ENSG00000146476_ARMT1,ENSG00000146530_VWDE,ENSG00000146535_GNA12,ENSG00000146540_C7orf50,ENSG00000146555_SDK1,ENSG00000146574_CCZ1B,ENSG00000146576_C7orf26,ENSG00000146587_RBAK,ENSG00000146592_CREB5,ENSG00000146670_CDCA5,ENSG00000146674_IGFBP3,ENSG00000146676_PURB,ENSG00000146701_MDH2,ENSG00000146729_GBAS,ENSG00000146731_CCT6A,ENSG00000146733_PSPH,ENSG00000146757_ZNF92,ENSG00000146776_ATXN7L1,ENSG00000146802_TMEM168,ENSG00000146826_C7orf43,ENSG00000146828_SLC12A9,ENSG00000146830_GIGYF1,ENSG00000146833_TRIM4,ENSG00000146834_MEPCE,ENSG00000146842_TMEM209,ENSG00000146856_AGBL3,ENSG00000146858_ZC3HAV1L,ENSG00000146859_TMEM140,ENSG00000146872_TLK2,ENSG00000146904_EPHA1,ENSG00000146909_NOM1,ENSG00000146918_NCAPG2,ENSG00000146955_RAB19,ENSG00000146963_LUC7L2,ENSG00000147010_SH3KBP1,ENSG00000147036_LANCL3,ENSG00000147044_CASK,ENSG00000147050_KDM6A,ENSG00000147065_MSN,ENSG00000147099_HDAC8,ENSG00000147118_ZNF182,ENSG00000147119_CHST7,ENSG00000147121_KRBOX4,ENSG00000147123_NDUFB11,ENSG00000147124_ZNF41,ENSG00000147130_ZMYM3,ENSG00000147133_TAF1,ENSG00000147138_GPR174,ENSG00000147140_NONO,ENSG00000147155_EBP,ENSG00000147162_OGT,ENSG00000147164_SNX12,ENSG00000147166_ITGB1BP2,ENSG00000147168_IL2RG,ENSG00000147174_ACRC,ENSG00000147180_ZNF711,ENSG00000147202_DIAPH2,ENSG00000147224_PRPS1,ENSG00000147231_CXorf57,ENSG00000147251_DOCK11,ENSG00000147274_RBMX,ENSG00000147316_MCPH1,ENSG00000147324_MFHAS1,ENSG00000147364_FBXO25,ENSG00000147383_NSDHL,ENSG00000147394_ZNF185,ENSG00000147400_CETN2,ENSG00000147403_RPL10,ENSG00000147408_CSGALNACT1,ENSG00000147416_ATP6V1B2,ENSG00000147419_CCDC25,ENSG00000147421_HMBOX1,ENSG00000147437_GNRH1,ENSG00000147439_BIN3,ENSG00000147443_DOK2,ENSG00000147454_SLC25A37,ENSG00000147457_CHMP7,ENSG00000147459_DOCK5,ENSG00000147471_PROSC,ENSG00000147475_ERLIN2,ENSG00000147526_TACC1,ENSG00000147533_GOLGA7,ENSG00000147535_PLPP5,ENSG00000147536_GINS4,ENSG00000147548_WHSC1L1,ENSG00000147576_ADHFE1,ENSG00000147586_MRPS28,ENSG00000147592_LACTB2,ENSG00000147601_TERF1,ENSG00000147604_RPL7,ENSG00000147649_MTDH,ENSG00000147650_LRP12,ENSG00000147654_EBAG9,ENSG00000147669_POLR2K,ENSG00000147677_EIF3H,ENSG00000147679_UTP23,ENSG00000147684_NDUFB9,ENSG00000147687_TATDN1,ENSG00000147789_ZNF7,ENSG00000147804_SLC39A4,ENSG00000147813_NAPRT,ENSG00000147852_VLDLR,ENSG00000147853_AK3,ENSG00000147854_UHRF2,ENSG00000147872_PLIN2,ENSG00000147874_HAUS6,ENSG00000147883_CDKN2B,ENSG00000147889_CDKN2A,ENSG00000147894_C9orf72,ENSG00000147905_ZCCHC7,ENSG00000147955_SIGMAR1,ENSG00000147996_CBWD5,ENSG00000148019_CEP78,ENSG00000148057_IDNK,ENSG00000148090_AUH,ENSG00000148110_MFSD14B,ENSG00000148120_C9orf3,ENSG00000148153_INIP,ENSG00000148154_UGCG,ENSG00000148158_SNX30,ENSG00000148175_STOM,ENSG00000148180_GSN,ENSG00000148187_MRRF,ENSG00000148200_NR6A1,ENSG00000148218_ALAD,ENSG00000148219_ASTN2,ENSG00000148225_WDR31,ENSG00000148229_POLE3,ENSG00000148248_SURF4,ENSG00000148288_GBGT1,ENSG00000148290_SURF1,ENSG00000148291_SURF2,ENSG00000148296_SURF6,ENSG00000148297_MED22,ENSG00000148300_REXO4,ENSG00000148303_RPL7A,ENSG00000148308_GTF3C5,ENSG00000148331_ASB6,ENSG00000148334_PTGES2,ENSG00000148335_NTMT1,ENSG00000148337_CIZ1,ENSG00000148339_SLC25A25,ENSG00000148341_SH3GLB2,ENSG00000148343_MIGA2,ENSG00000148344_PTGES,ENSG00000148346_LCN2,ENSG00000148356_LRSAM1,ENSG00000148358_GPR107,ENSG00000148362_C9orf142,ENSG00000148384_INPP5E,ENSG00000148396_SEC16A,ENSG00000148399_DPH7,ENSG00000148400_NOTCH1,ENSG00000148411_NACC2,ENSG00000148429_USP6NL,ENSG00000148444_COMMD3,ENSG00000148450_MSRB2,ENSG00000148459_PDSS1,ENSG00000148481_FAM188A,ENSG00000148483_TMEM236,ENSG00000148484_RSU1,ENSG00000148488_ST8SIA6,ENSG00000148498_PARD3,ENSG00000148516_ZEB1,ENSG00000148572_NRBF2,ENSG00000148606_POLR3A,ENSG00000148634_HERC4,ENSG00000148655_C10orf11,ENSG00000148660_CAMK2G,ENSG00000148672_GLUD1,ENSG00000148688_RPP30,ENSG00000148690_FRA10AC1,ENSG00000148700_ADD3,ENSG00000148719_DNAJB12,ENSG00000148730_EIF4EBP2,ENSG00000148737_TCF7L2,ENSG00000148773_MKI67,ENSG00000148803_FUOM,ENSG00000148814_LRRC27,ENSG00000148824_MTG1,ENSG00000148832_PAOX,ENSG00000148834_GSTO1,ENSG00000148835_TAF5,ENSG00000148840_PPRC1,ENSG00000148841_ITPRIP,ENSG00000148842_CNNM2,ENSG00000148843_PDCD11,ENSG00000148848_ADAM12,ENSG00000148908_RGS10,ENSG00000148925_BTBD10,ENSG00000148926_ADM,ENSG00000148943_LIN7C,ENSG00000148950_IMMP1L,ENSG00000148985_PGAP2,ENSG00000149016_TUT1,ENSG00000149084_HSD17B12,ENSG00000149089_APIP,ENSG00000149091_DGKZ,ENSG00000149100_EIF3M,ENSG00000149115_TNKS1BP1,ENSG00000149131_SERPING1,ENSG00000149136_SSRP1,ENSG00000149150_SLC43A1,ENSG00000149177_PTPRJ,ENSG00000149179_C11orf49,ENSG00000149182_ARFGAP2,ENSG00000149187_CELF1,ENSG00000149196_HIKESHI,ENSG00000149212_SESN3,ENSG00000149218_ENDOD1,ENSG00000149231_CCDC82,ENSG00000149257_SERPINH1,ENSG00000149260_CAPN5,ENSG00000149262_INTS4,ENSG00000149269_PAK1,ENSG00000149273_RPS3,ENSG00000149289_ZC3H12C,ENSG00000149292_TTC12,ENSG00000149294_NCAM1,ENSG00000149308_NPAT,ENSG00000149311_ATM,ENSG00000149313_AASDHPPT,ENSG00000149346_SLX4IP,ENSG00000149357_LAMTOR1,ENSG00000149418_ST14,ENSG00000149428_HYOU1,ENSG00000149474_KAT14,ENSG00000149476_TKFC,ENSG00000149480_MTA2,ENSG00000149483_TMEM138,ENSG00000149485_FADS1,ENSG00000149489_ROM1,ENSG00000149499_EML3,ENSG00000149503_INCENP,ENSG00000149516_MS4A3,ENSG00000149527_PLCH2,ENSG00000149532_CPSF7,ENSG00000149534_MS4A2,ENSG00000149541_B3GAT3,ENSG00000149547_EI24,ENSG00000149548_CCDC15,ENSG00000149554_CHEK1,ENSG00000149564_ESAM,ENSG00000149573_MPZL2,ENSG00000149577_SIDT2,ENSG00000149582_TMEM25,ENSG00000149591_TAGLN,ENSG00000149600_COMMD7,ENSG00000149636_DSN1,ENSG00000149639_SOGA1,ENSG00000149646_CNBD2,ENSG00000149657_LSM14B,ENSG00000149658_YTHDF1,ENSG00000149679_CABLES2,ENSG00000149716_ORAOV1,ENSG00000149743_TRPT1,ENSG00000149761_NUDT22,ENSG00000149781_FERMT3,ENSG00000149782_PLCB3,ENSG00000149792_MRPL49,ENSG00000149798_CDC42EP2,ENSG00000149806_FAU,ENSG00000149809_TM7SF2,ENSG00000149823_VPS51,ENSG00000149923_PPP4C,ENSG00000149925_ALDOA,ENSG00000149929_HIRIP3,ENSG00000149930_TAOK2,ENSG00000149932_TMEM219,ENSG00000149970_CNKSR2,ENSG00000150045_KLRF1,ENSG00000150048_CLEC1A,ENSG00000150054_MPP7,ENSG00000150076_AL356053.1,ENSG00000150093_ITGB1,ENSG00000150316_CWC15,ENSG00000150337_FCGR1A,ENSG00000150347_ARID5B,ENSG00000150401_DCUN1D2,ENSG00000150403_TMCO3,ENSG00000150433_TMEM218,ENSG00000150455_TIRAP,ENSG00000150456_EEF1AKMT1,ENSG00000150457_LATS2,ENSG00000150459_SAP18,ENSG00000150477_KIAA1328,ENSG00000150527_CTAGE5,ENSG00000150540_HNMT,ENSG00000150593_PDCD4,ENSG00000150627_WDR17,ENSG00000150636_CCDC102B,ENSG00000150637_CD226,ENSG00000150681_RGS18,ENSG00000150687_PRSS23,ENSG00000150712_MTMR12,ENSG00000150753_CCT5,ENSG00000150756_FAM173B,ENSG00000150760_DOCK1,ENSG00000150764_DIXDC1,ENSG00000150768_DLAT,ENSG00000150776_C11orf57,ENSG00000150779_TIMM8B,ENSG00000150782_IL18,ENSG00000150787_PTS,ENSG00000150867_PIP4K2A,ENSG00000150907_FOXO1,ENSG00000150938_CRIM1,ENSG00000150961_SEC24D,ENSG00000150967_ABCB9,ENSG00000150977_RILPL2,ENSG00000150990_DHX37,ENSG00000150991_UBC,ENSG00000150995_ITPR1,ENSG00000151006_PRSS53,ENSG00000151012_SLC7A11,ENSG00000151014_NOCT,ENSG00000151023_ENKUR,ENSG00000151062_CACNA2D4,ENSG00000151065_DCP1B,ENSG00000151090_THRB,ENSG00000151092_NGLY1,ENSG00000151093_OXSM,ENSG00000151116_UEVLD,ENSG00000151117_TMEM86A,ENSG00000151131_C12orf45,ENSG00000151135_TMEM263,ENSG00000151136_BTBD11,ENSG00000151148_UBE3B,ENSG00000151150_ANK3,ENSG00000151151_IPMK,ENSG00000151164_RAD9B,ENSG00000151176_PLBD2,ENSG00000151208_DLG5,ENSG00000151229_SLC2A13,ENSG00000151233_GXYLT1,ENSG00000151239_TWF1,ENSG00000151240_DIP2C,ENSG00000151247_EIF4E,ENSG00000151287_TEX30,ENSG00000151292_CSNK1G3,ENSG00000151304_SRFBP1,ENSG00000151320_AKAP6,ENSG00000151327_FAM177A1,ENSG00000151332_MBIP,ENSG00000151348_EXT2,ENSG00000151353_TMEM18,ENSG00000151366_NDUFC2,ENSG00000151376_ME3,ENSG00000151413_NUBPL,ENSG00000151414_NEK7,ENSG00000151422_FER,ENSG00000151445_VIPAS39,ENSG00000151458_ANKRD50,ENSG00000151461_UPF2,ENSG00000151465_CDC123,ENSG00000151466_SCLT1,ENSG00000151470_C4orf33,ENSG00000151474_FRMD4A,ENSG00000151490_PTPRO,ENSG00000151491_EPS8,ENSG00000151498_ACAD8,ENSG00000151500_THYN1,ENSG00000151502_VPS26B,ENSG00000151503_NCAPD3,ENSG00000151532_VTI1A,ENSG00000151552_QDPR,ENSG00000151553_FAM160B1,ENSG00000151575_TEX9,ENSG00000151576_QTRT2,ENSG00000151611_MMAA,ENSG00000151612_ZNF827,ENSG00000151623_NR3C2,ENSG00000151650_VENTX,ENSG00000151651_ADAM8,ENSG00000151657_KIN,ENSG00000151665_PIGF,ENSG00000151687_ANKAR,ENSG00000151689_INPP1,ENSG00000151690_MFSD6,ENSG00000151692_RNF144A,ENSG00000151693_ASAP2,ENSG00000151694_ADAM17,ENSG00000151702_FLI1,ENSG00000151715_TMEM45B,ENSG00000151718_WWC2,ENSG00000151725_CENPU,ENSG00000151726_ACSL1,ENSG00000151729_SLC25A4,ENSG00000151743_AMN1,ENSG00000151746_BICD1,ENSG00000151748_SAV1,ENSG00000151773_CCDC122,ENSG00000151779_NBAS,ENSG00000151789_ZNF385D,ENSG00000151806_GUF1,ENSG00000151835_SACS,ENSG00000151849_CENPJ,ENSG00000151876_FBXO4,ENSG00000151881_TMEM267,ENSG00000151882_CCL28,ENSG00000151883_PARP8,ENSG00000151893_CACUL1,ENSG00000151914_DST,ENSG00000151923_TIAL1,ENSG00000151929_BAG3,ENSG00000151948_GLT1D1,ENSG00000152056_AP1S3,ENSG00000152061_RABGAP1L,ENSG00000152078_TMEM56,ENSG00000152082_MZT2B,ENSG00000152102_FAM168B,ENSG00000152127_MGAT5,ENSG00000152133_GPATCH11,ENSG00000152147_GEMIN6,ENSG00000152193_RNF219,ENSG00000152207_CYSLTR2,ENSG00000152213_ARL11,ENSG00000152217_SETBP1,ENSG00000152219_ARL14EP,ENSG00000152223_EPG5,ENSG00000152229_PSTPIP2,ENSG00000152234_ATP5A1,ENSG00000152240_HAUS1,ENSG00000152242_C18orf25,ENSG00000152256_PDK1,ENSG00000152270_PDE3B,ENSG00000152291_TGOLN2,ENSG00000152292_SH2D6,ENSG00000152315_KCNK13,ENSG00000152332_UHMK1,ENSG00000152348_ATG10,ENSG00000152359_POC5,ENSG00000152380_FAM151B,ENSG00000152382_TADA1,ENSG00000152404_CWF19L2,ENSG00000152409_JMY,ENSG00000152413_HOMER1,ENSG00000152422_XRCC4,ENSG00000152433_ZNF547,ENSG00000152439_ZNF773,ENSG00000152443_ZNF776,ENSG00000152454_ZNF256,ENSG00000152455_SUV39H2,ENSG00000152457_DCLRE1C,ENSG00000152463_OLAH,ENSG00000152464_RPP38,ENSG00000152465_NMT2,ENSG00000152484_USP12,ENSG00000152492_CCDC50,ENSG00000152495_CAMK4,ENSG00000152503_TRIM36,ENSG00000152518_ZFP36L2,ENSG00000152520_PAN3,ENSG00000152556_PFKM,ENSG00000152558_TMEM123,ENSG00000152582_SPEF2,ENSG00000152601_MBNL1,ENSG00000152620_NADK2,ENSG00000152642_GPD1L,ENSG00000152683_SLC30A6,ENSG00000152684_PELO,ENSG00000152689_RASGRP3,ENSG00000152700_SAR1B,ENSG00000152749_GPR180,ENSG00000152760_TCTEX1D1,ENSG00000152763_WDR78,ENSG00000152766_ANKRD22,ENSG00000152778_IFIT5,ENSG00000152782_PANK1,ENSG00000152784_PRDM8,ENSG00000152795_HNRNPDL,ENSG00000152804_HHEX,ENSG00000152818_UTRN,ENSG00000152894_PTPRK,ENSG00000152904_GGPS1,ENSG00000152926_ZNF117,ENSG00000152942_RAD17,ENSG00000152944_MED21,ENSG00000152952_PLOD2,ENSG00000152969_JAKMIP1,ENSG00000152990_ADGRA3,ENSG00000153006_SREK1IP1,ENSG00000153015_CWC27,ENSG00000153029_MR1,ENSG00000153037_SRP19,ENSG00000153044_CENPH,ENSG00000153046_CDYL,ENSG00000153048_CARHSP1,ENSG00000153064_BANK1,ENSG00000153066_TXNDC11,ENSG00000153071_DAB2,ENSG00000153093_ACOXL,ENSG00000153094_BCL2L11,ENSG00000153107_ANAPC1,ENSG00000153113_CAST,ENSG00000153130_SCOC,ENSG00000153140_CETN3,ENSG00000153147_SMARCA5,ENSG00000153162_BMP6,ENSG00000153179_RASSF3,ENSG00000153187_HNRNPU,ENSG00000153201_RANBP2,ENSG00000153207_AHCTF1,ENSG00000153208_MERTK,ENSG00000153214_TMEM87B,ENSG00000153234_NR4A2,ENSG00000153250_RBMS1,ENSG00000153253_SCN3A,ENSG00000153283_CD96,ENSG00000153310_FAM49B,ENSG00000153317_ASAP1,ENSG00000153339_TRAPPC8,ENSG00000153391_INO80C,ENSG00000153395_LPCAT1,ENSG00000153406_NMRAL1,ENSG00000153443_UBALD1,ENSG00000153485_TMEM251,ENSG00000153487_ING1,ENSG00000153531_ADPRHL1,ENSG00000153551_CMTM7,ENSG00000153560_UBP1,ENSG00000153561_RMND5A,ENSG00000153563_CD8A,ENSG00000153574_RPIA,ENSG00000153767_GTF2E1,ENSG00000153774_CFDP1,ENSG00000153786_ZDHHC7,ENSG00000153790_C7orf31,ENSG00000153814_JAZF1,ENSG00000153815_CMIP,ENSG00000153823_PID1,ENSG00000153827_TRIP12,ENSG00000153879_CEBPG,ENSG00000153885_KCTD15,ENSG00000153896_ZNF599,ENSG00000153898_MCOLN2,ENSG00000153914_SREK1,ENSG00000153922_CHD1,ENSG00000153933_DGKE,ENSG00000153936_HS2ST1,ENSG00000153944_MSI2,ENSG00000153975_ZUFSP,ENSG00000153982_GDPD1,ENSG00000153989_NUS1,ENSG00000154001_PPP2R5E,ENSG00000154016_GRAP,ENSG00000154027_AK5,ENSG00000154059_IMPACT,ENSG00000154079_SDHAF4,ENSG00000154102_C16orf74,ENSG00000154114_TBCEL,ENSG00000154122_ANKH,ENSG00000154124_OTULIN,ENSG00000154127_UBASH3B,ENSG00000154144_TBRG1,ENSG00000154146_NRGN,ENSG00000154153_FAM134B,ENSG00000154165_GPR15,ENSG00000154174_TOMM70,ENSG00000154188_ANGPT1,ENSG00000154217_PITPNC1,ENSG00000154222_CC2D1B,ENSG00000154229_PRKCA,ENSG00000154237_LRRK1,ENSG00000154262_ABCA6,ENSG00000154263_ABCA10,ENSG00000154265_ABCA5,ENSG00000154305_MIA3,ENSG00000154309_DISP1,ENSG00000154310_TNIK,ENSG00000154328_NEIL2,ENSG00000154330_PGM5,ENSG00000154358_OBSCN,ENSG00000154359_LONRF1,ENSG00000154370_TRIM11,ENSG00000154429_CCSAP,ENSG00000154447_SH3RF1,ENSG00000154451_GBP5,ENSG00000154473_BUB3,ENSG00000154511_FAM69A,ENSG00000154518_ATP5G3,ENSG00000154582_TCEB1,ENSG00000154589_LY96,ENSG00000154640_BTG3,ENSG00000154642_C21orf91,ENSG00000154655_L3MBTL4,ENSG00000154710_RABGEF1,ENSG00000154719_MRPL39,ENSG00000154723_ATP5J,ENSG00000154727_GABPA,ENSG00000154734_ADAMTS1,ENSG00000154743_TSEN2,ENSG00000154760_SLFN13,ENSG00000154767_XPC,ENSG00000154781_CCDC174,ENSG00000154803_FLCN,ENSG00000154813_DPH3,ENSG00000154814_OXNAD1,ENSG00000154822_PLCL2,ENSG00000154832_CXXC1,ENSG00000154839_SKA1,ENSG00000154845_PPP4R1,ENSG00000154856_APCDD1,ENSG00000154889_MPPE1,ENSG00000154917_RAB6B,ENSG00000154928_EPHB1,ENSG00000154930_ACSS1,ENSG00000154945_ANKRD40,ENSG00000154957_ZNF18,ENSG00000154978_VOPP1,ENSG00000155008_APOOL,ENSG00000155016_CYP2U1,ENSG00000155034_FBXL18,ENSG00000155085_AK9,ENSG00000155090_KLF10,ENSG00000155093_PTPRN2,ENSG00000155096_AZIN1,ENSG00000155097_ATP6V1C1,ENSG00000155099_TMEM55A,ENSG00000155100_OTUD6B,ENSG00000155111_CDK19,ENSG00000155115_GTF3C6,ENSG00000155158_TTC39B,ENSG00000155189_AGPAT5,ENSG00000155229_MMS19,ENSG00000155252_PI4K2A,ENSG00000155254_MARVELD1,ENSG00000155256_ZFYVE27,ENSG00000155265_GOLGA7B,ENSG00000155275_TRMT44,ENSG00000155287_SLC25A28,ENSG00000155304_HSPA13,ENSG00000155307_SAMSN1,ENSG00000155313_USP25,ENSG00000155324_GRAMD3,ENSG00000155329_ZCCHC10,ENSG00000155330_C16orf87,ENSG00000155363_MOV10,ENSG00000155366_RHOC,ENSG00000155368_DBI,ENSG00000155380_SLC16A1,ENSG00000155393_HEATR3,ENSG00000155438_NIFK,ENSG00000155463_OXA1L,ENSG00000155465_SLC7A7,ENSG00000155506_LARP1,ENSG00000155508_CNOT8,ENSG00000155542_SETD9,ENSG00000155545_MIER3,ENSG00000155561_NUP205,ENSG00000155592_ZKSCAN2,ENSG00000155621_C9orf85,ENSG00000155629_PIK3AP1,ENSG00000155636_RBM45,ENSG00000155657_TTN,ENSG00000155659_VSIG4,ENSG00000155660_PDIA4,ENSG00000155666_KDM8,ENSG00000155729_KCTD18,ENSG00000155744_FAM126B,ENSG00000155749_ALS2CR12,ENSG00000155755_TMEM237,ENSG00000155827_RNF20,ENSG00000155846_PPARGC1B,ENSG00000155849_ELMO1,ENSG00000155850_SLC26A2,ENSG00000155858_LSM11,ENSG00000155868_MED7,ENSG00000155876_RRAGA,ENSG00000155893_PXYLP1,ENSG00000155903_RASA2,ENSG00000155906_RMND1,ENSG00000155926_SLA,ENSG00000155957_TMBIM4,ENSG00000155959_VBP1,ENSG00000155961_RAB39B,ENSG00000155962_CLIC2,ENSG00000155966_AFF2,ENSG00000155970_MICU3,ENSG00000155975_VPS37A,ENSG00000156011_PSD3,ENSG00000156017_CARNMT1,ENSG00000156026_MCU,ENSG00000156030_ELMSAN1,ENSG00000156042_CFAP70,ENSG00000156050_FAM161B,ENSG00000156052_GNAQ,ENSG00000156110_ADK,ENSG00000156113_KCNMA1,ENSG00000156127_BATF,ENSG00000156136_DCK,ENSG00000156140_ADAMTS3,ENSG00000156162_DPY19L4,ENSG00000156170_NDUFAF6,ENSG00000156171_DRAM2,ENSG00000156172_C8orf37,ENSG00000156206_CFAP161,ENSG00000156232_WHAMM,ENSG00000156239_N6AMT1,ENSG00000156253_RWDD2B,ENSG00000156256_USP16,ENSG00000156261_CCT8,ENSG00000156265_MAP3K7CL,ENSG00000156273_BACH1,ENSG00000156299_TIAM1,ENSG00000156304_SCAF4,ENSG00000156313_RPGR,ENSG00000156345_CDK20,ENSG00000156374_PCGF6,ENSG00000156381_ANKRD9,ENSG00000156384_SFR1,ENSG00000156398_SFXN2,ENSG00000156411_C14orf2,ENSG00000156414_TDRD9,ENSG00000156453_PCDH1,ENSG00000156467_UQCRB,ENSG00000156469_MTERF3,ENSG00000156471_PTDSS1,ENSG00000156475_PPP2R2B,ENSG00000156482_RPL30,ENSG00000156500_FAM122C,ENSG00000156502_SUPV3L1,ENSG00000156504_FAM122B,ENSG00000156508_EEF1A1,ENSG00000156510_HKDC1,ENSG00000156515_HK1,ENSG00000156521_TYSND1,ENSG00000156531_PHF6,ENSG00000156535_CD109,ENSG00000156587_UBE2L6,ENSG00000156599_ZDHHC5,ENSG00000156603_MED19,ENSG00000156639_ZFAND3,ENSG00000156642_NPTN,ENSG00000156650_KAT6B,ENSG00000156671_SAMD8,ENSG00000156675_RAB11FIP1,ENSG00000156697_UTP14A,ENSG00000156709_AIFM1,ENSG00000156711_MAPK13,ENSG00000156735_BAG4,ENSG00000156738_MS4A1,ENSG00000156787_TBC1D31,ENSG00000156795_WDYHV1,ENSG00000156802_ATAD2,ENSG00000156804_FBXO32,ENSG00000156831_NSMCE2,ENSG00000156853_ZNF689,ENSG00000156858_PRR14,ENSG00000156860_FBRS,ENSG00000156869_FRRS1,ENSG00000156873_PHKG2,ENSG00000156875_MFSD14A,ENSG00000156876_SASS6,ENSG00000156886_ITGAD,ENSG00000156928_MALSU1,ENSG00000156931_VPS8,ENSG00000156958_GALK2,ENSG00000156970_BUB1B,ENSG00000156973_PDE6D,ENSG00000156976_EIF4A2,ENSG00000156983_BRPF1,ENSG00000156990_RPUSD3,ENSG00000157014_TATDN2,ENSG00000157017_GHRL,ENSG00000157020_SEC13,ENSG00000157036_EXOG,ENSG00000157045_NTAN1,ENSG00000157064_NMNAT2,ENSG00000157077_ZFYVE9,ENSG00000157106_SMG1,ENSG00000157107_FCHO2,ENSG00000157152_SYN2,ENSG00000157168_NRG1,ENSG00000157181_C1orf27,ENSG00000157184_CPT2,ENSG00000157191_NECAP2,ENSG00000157193_LRP8,ENSG00000157212_PAXIP1,ENSG00000157216_SSBP3,ENSG00000157224_CLDN12,ENSG00000157227_MMP14,ENSG00000157240_FZD1,ENSG00000157259_GATAD1,ENSG00000157303_SUSD3,ENSG00000157326_DHRS4,ENSG00000157349_DDX19B,ENSG00000157350_ST3GAL2,ENSG00000157353_FUK,ENSG00000157379_DHRS1,ENSG00000157388_CACNA1D,ENSG00000157404_KIT,ENSG00000157426_AASDH,ENSG00000157429_ZNF19,ENSG00000157445_CACNA2D3,ENSG00000157450_RNF111,ENSG00000157456_CCNB2,ENSG00000157483_MYO1E,ENSG00000157500_APPL1,ENSG00000157514_TSC22D3,ENSG00000157538_DSCR3,ENSG00000157540_DYRK1A,ENSG00000157551_KCNJ15,ENSG00000157554_ERG,ENSG00000157557_ETS2,ENSG00000157570_TSPAN18,ENSG00000157593_SLC35B2,ENSG00000157600_TMEM164,ENSG00000157601_MX1,ENSG00000157617_C2CD2,ENSG00000157625_TAB3,ENSG00000157637_SLC38A10,ENSG00000157657_ZNF618,ENSG00000157693_TMEM268,ENSG00000157734_SNX22,ENSG00000157741_UBN2,ENSG00000157764_BRAF,ENSG00000157778_PSMG3,ENSG00000157796_WDR19,ENSG00000157800_SLC37A3,ENSG00000157823_AP3S2,ENSG00000157827_FMNL2,ENSG00000157837_SPPL3,ENSG00000157869_RAB28,ENSG00000157870_FAM213B,ENSG00000157873_TNFRSF14,ENSG00000157881_PANK4,ENSG00000157895_C12orf43,ENSG00000157911_PEX10,ENSG00000157916_RER1,ENSG00000157933_SKI,ENSG00000157954_WIPI2,ENSG00000157978_LDLRAP1,ENSG00000157985_AGAP1,ENSG00000158006_PAFAH2,ENSG00000158019_BRE,ENSG00000158023_WDR66,ENSG00000158042_MRPL17,ENSG00000158050_DUSP2,ENSG00000158062_UBXN11,ENSG00000158079_PTPDC1,ENSG00000158089_GALNT14,ENSG00000158092_NCK1,ENSG00000158104_HPD,ENSG00000158106_RHPN1,ENSG00000158109_TPRG1L,ENSG00000158122_AAED1,ENSG00000158156_XKR8,ENSG00000158158_CNNM4,ENSG00000158161_EYA3,ENSG00000158163_DZIP1L,ENSG00000158169_FANCC,ENSG00000158186_MRAS,ENSG00000158195_WASF2,ENSG00000158201_ABHD3,ENSG00000158234_FAIM,ENSG00000158290_CUL4B,ENSG00000158301_GPRASP2,ENSG00000158321_AUTS2,ENSG00000158352_SHROOM4,ENSG00000158373_HIST1H2BD,ENSG00000158402_CDC25C,ENSG00000158406_HIST1H4H,ENSG00000158411_MITD1,ENSG00000158417_EIF5B,ENSG00000158435_CNOT11,ENSG00000158457_TSPAN33,ENSG00000158467_AHCYL2,ENSG00000158470_B4GALT5,ENSG00000158473_CD1D,ENSG00000158480_SPATA2,ENSG00000158481_CD1C,ENSG00000158517_NCF1,ENSG00000158526_TSR2,ENSG00000158528_PPP1R9A,ENSG00000158545_ZC3H18,ENSG00000158552_ZFAND2B,ENSG00000158555_GDPD5,ENSG00000158578_ALAS2,ENSG00000158604_TMED4,ENSG00000158615_PPP1R15B,ENSG00000158623_COPG2,ENSG00000158636_EMSY,ENSG00000158669_GPAT4,ENSG00000158683_PKD1L1,ENSG00000158691_ZSCAN12,ENSG00000158710_TAGLN2,ENSG00000158711_ELK4,ENSG00000158714_SLAMF8,ENSG00000158715_SLC45A3,ENSG00000158716_DUSP23,ENSG00000158717_RNF166,ENSG00000158769_F11R,ENSG00000158773_USF1,ENSG00000158792_SPATA2L,ENSG00000158793_NIT1,ENSG00000158796_DEDD,ENSG00000158805_ZNF276,ENSG00000158813_EDA,ENSG00000158825_CDA,ENSG00000158828_PINK1,ENSG00000158850_B4GALT3,ENSG00000158856_DMTN,ENSG00000158863_FAM160B2,ENSG00000158864_NDUFS2,ENSG00000158869_FCER1G,ENSG00000158882_TOMM40L,ENSG00000158887_MPZ,ENSG00000158941_CCAR2,ENSG00000158966_CACHD1,ENSG00000158985_CDC42SE2,ENSG00000158987_RAPGEF6,ENSG00000159023_EPB41,ENSG00000159055_MIS18A,ENSG00000159063_ALG8,ENSG00000159069_FBXW5,ENSG00000159079_C21orf59,ENSG00000159082_SYNJ1,ENSG00000159086_PAXBP1,ENSG00000159110_IFNAR2,ENSG00000159111_MRPL10,ENSG00000159128_IFNGR2,ENSG00000159131_GART,ENSG00000159140_SON,ENSG00000159147_DONSON,ENSG00000159176_CSRP1,ENSG00000159189_C1QC,ENSG00000159199_ATP5G1,ENSG00000159200_RCAN1,ENSG00000159202_UBE2Z,ENSG00000159210_SNF8,ENSG00000159214_CCDC24,ENSG00000159216_RUNX1,ENSG00000159228_CBR1,ENSG00000159256_MORC3,ENSG00000159259_CHAF1B,ENSG00000159267_HLCS,ENSG00000159314_ARHGAP27,ENSG00000159322_ADPGK,ENSG00000159335_PTMS,ENSG00000159339_PADI4,ENSG00000159346_ADIPOR1,ENSG00000159348_CYB5R1,ENSG00000159352_PSMD4,ENSG00000159363_ATP13A2,ENSG00000159377_PSMB4,ENSG00000159388_BTG2,ENSG00000159399_HK2,ENSG00000159403_C1R,ENSG00000159423_ALDH4A1,ENSG00000159433_STARD9,ENSG00000159445_THEM4,ENSG00000159459_UBR1,ENSG00000159461_AMFR,ENSG00000159479_MED8,ENSG00000159496_RGL4,ENSG00000159556_ISL2,ENSG00000159579_RSPRY1,ENSG00000159588_CCDC17,ENSG00000159592_GPBP1L1,ENSG00000159593_NAE1,ENSG00000159596_TMEM69,ENSG00000159618_ADGRG5,ENSG00000159658_EFCAB14,ENSG00000159674_SPON2,ENSG00000159685_CHCHD6,ENSG00000159692_CTBP1,ENSG00000159720_ATP6V0D1,ENSG00000159733_ZFYVE28,ENSG00000159753_CARMIL2,ENSG00000159761_C16orf86,ENSG00000159784_FAM131B,ENSG00000159788_RGS12,ENSG00000159792_PSKH1,ENSG00000159840_ZYX,ENSG00000159842_ABR,ENSG00000159873_CCDC117,ENSG00000159882_ZNF230,ENSG00000159884_CCDC107,ENSG00000159885_ZNF222,ENSG00000159905_ZNF221,ENSG00000159917_ZNF235,ENSG00000159921_GNE,ENSG00000159958_TNFRSF13C,ENSG00000160007_ARHGAP35,ENSG00000160013_PTGIR,ENSG00000160014_CALM3,ENSG00000160049_DFFA,ENSG00000160050_CCDC28B,ENSG00000160055_TMEM234,ENSG00000160058_BSDC1,ENSG00000160072_ATAD3B,ENSG00000160075_SSU72,ENSG00000160087_UBE2J2,ENSG00000160094_ZNF362,ENSG00000160111_CPAMD8,ENSG00000160113_NR2F6,ENSG00000160117_ANKLE1,ENSG00000160124_CCDC58,ENSG00000160131_VMA21,ENSG00000160145_KALRN,ENSG00000160179_ABCG1,ENSG00000160180_TFF3,ENSG00000160185_UBASH3A,ENSG00000160190_SLC37A1,ENSG00000160193_WDR4,ENSG00000160194_NDUFV3,ENSG00000160199_PKNOX1,ENSG00000160201_U2AF1,ENSG00000160208_RRP1B,ENSG00000160209_PDXK,ENSG00000160211_G6PD,ENSG00000160213_CSTB,ENSG00000160214_RRP1,ENSG00000160216_AGPAT3,ENSG00000160218_TRAPPC10,ENSG00000160219_GAB3,ENSG00000160226_C21orf2,ENSG00000160229_ZNF66,ENSG00000160255_ITGB2,ENSG00000160256_FAM207A,ENSG00000160271_RALGDS,ENSG00000160285_LSS,ENSG00000160293_VAV2,ENSG00000160294_MCM3AP,ENSG00000160298_C21orf58,ENSG00000160299_PCNT,ENSG00000160305_DIP2A,ENSG00000160307_S100B,ENSG00000160310_PRMT2,ENSG00000160318_CLDND2,ENSG00000160321_ZNF208,ENSG00000160325_CACFD1,ENSG00000160326_SLC2A6,ENSG00000160336_ZNF761,ENSG00000160352_ZNF714,ENSG00000160360_GPSM1,ENSG00000160392_C19orf47,ENSG00000160404_TOR2A,ENSG00000160408_ST6GALNAC6,ENSG00000160410_SHKBP1,ENSG00000160439_RDH13,ENSG00000160445_ZER1,ENSG00000160446_ZDHHC12,ENSG00000160551_TAOK1,ENSG00000160563_MED27,ENSG00000160570_DEDD2,ENSG00000160584_SIK3,ENSG00000160588_MPZL3,ENSG00000160593_JAML,ENSG00000160602_NEK8,ENSG00000160613_PCSK7,ENSG00000160633_SAFB,ENSG00000160654_CD3G,ENSG00000160679_CHTOP,ENSG00000160683_CXCR5,ENSG00000160685_ZBTB7B,ENSG00000160688_FLAD1,ENSG00000160691_SHC1,ENSG00000160695_VPS11,ENSG00000160703_NLRX1,ENSG00000160710_ADAR,ENSG00000160712_IL6R,ENSG00000160714_UBE2Q1,ENSG00000160741_CRTC2,ENSG00000160746_ANO10,ENSG00000160752_FDPS,ENSG00000160753_RUSC1,ENSG00000160767_FAM189B,ENSG00000160781_PAQR6,ENSG00000160783_PMF1,ENSG00000160785_SLC25A44,ENSG00000160789_LMNA,ENSG00000160791_CCR5,ENSG00000160796_NBEAL2,ENSG00000160799_CCDC12,ENSG00000160803_UBQLN4,ENSG00000160813_PPP1R35,ENSG00000160818_GPATCH4,ENSG00000160856_FCRL3,ENSG00000160877_NACC1,ENSG00000160883_HK3,ENSG00000160888_IER2,ENSG00000160908_ZNF394,ENSG00000160917_CPSF4,ENSG00000160932_LY6E,ENSG00000160948_VPS28,ENSG00000160949_TONSL,ENSG00000160953_MUM1,ENSG00000160957_RECQL4,ENSG00000160959_LRRC14,ENSG00000160961_ZNF333,ENSG00000160972_PPP1R16A,ENSG00000160991_ORAI2,ENSG00000160993_ALKBH4,ENSG00000160999_SH2B2,ENSG00000161010_MRNIP,ENSG00000161011_SQSTM1,ENSG00000161013_MGAT4B,ENSG00000161016_RPL8,ENSG00000161021_MAML1,ENSG00000161036_LRWD1,ENSG00000161040_FBXL13,ENSG00000161048_NAPEPLD,ENSG00000161057_PSMC2,ENSG00000161091_MFSD12,ENSG00000161179_YDJC,ENSG00000161202_DVL3,ENSG00000161203_AP2M1,ENSG00000161204_ABCF3,ENSG00000161217_PCYT1A,ENSG00000161265_U2AF1L4,ENSG00000161267_BDH1,ENSG00000161298_ZNF382,ENSG00000161381_PLXDC1,ENSG00000161395_PGAP3,ENSG00000161405_IKZF3,ENSG00000161513_FDXR,ENSG00000161526_SAP30BP,ENSG00000161533_ACOX1,ENSG00000161542_PRPSAP1,ENSG00000161547_SRSF2,ENSG00000161551_ZNF577,ENSG00000161558_TMEM143,ENSG00000161618_ALDH16A1,ENSG00000161638_ITGA5,ENSG00000161642_ZNF385A,ENSG00000161653_NAGS,ENSG00000161654_LSM12,ENSG00000161671_EMC10,ENSG00000161677_JOSD2,ENSG00000161692_DBF4B,ENSG00000161714_PLCD3,ENSG00000161791_FMNL3,ENSG00000161800_RACGAP1,ENSG00000161813_LARP4,ENSG00000161835_GRASP,ENSG00000161847_RAVER1,ENSG00000161888_SPC24,ENSG00000161904_LEMD2,ENSG00000161911_TREML1,ENSG00000161914_ZNF653,ENSG00000161920_MED11,ENSG00000161921_CXCL16,ENSG00000161929_SCIMP,ENSG00000161944_ASGR2,ENSG00000161955_TNFSF13,ENSG00000161956_SENP3,ENSG00000161960_EIF4A1,ENSG00000161970_RPL26,ENSG00000161980_POLR3K,ENSG00000161981_SNRNP25,ENSG00000161996_WDR90,ENSG00000161999_JMJD8,ENSG00000162032_SPSB3,ENSG00000162063_CCNF,ENSG00000162065_TBC1D24,ENSG00000162066_AMDHD2,ENSG00000162073_PAQR4,ENSG00000162076_FLYWCH2,ENSG00000162086_ZNF75A,ENSG00000162104_ADCY9,ENSG00000162129_CLPB,ENSG00000162139_NEU3,ENSG00000162144_CYB561A3,ENSG00000162148_PPP1R32,ENSG00000162174_ASRGL1,ENSG00000162191_UBXN1,ENSG00000162194_LBHD1,ENSG00000162222_TTC9C,ENSG00000162227_TAF6L,ENSG00000162231_NXF1,ENSG00000162236_STX5,ENSG00000162241_SLC25A45,ENSG00000162244_RPL29,ENSG00000162298_SYVN1,ENSG00000162300_ZFPL1,ENSG00000162302_RPS6KA4,ENSG00000162337_LRP5,ENSG00000162341_TPCN2,ENSG00000162366_PDZK1IP1,ENSG00000162367_TAL1,ENSG00000162368_CMPK1,ENSG00000162373_BEND5,ENSG00000162377_COA7,ENSG00000162378_ZYG11B,ENSG00000162384_C1orf123,ENSG00000162385_MAGOH,ENSG00000162390_ACOT11,ENSG00000162396_PARS2,ENSG00000162402_USP24,ENSG00000162407_PLPP3,ENSG00000162408_NOL9,ENSG00000162413_KLHL21,ENSG00000162415_ZSWIM5,ENSG00000162419_GMEB1,ENSG00000162430_SELENON,ENSG00000162434_JAK1,ENSG00000162437_RAVER2,ENSG00000162441_LZIC,ENSG00000162444_RBP7,ENSG00000162461_SLC25A34,ENSG00000162490_DRAXIN,ENSG00000162496_DHRS3,ENSG00000162511_LAPTM5,ENSG00000162517_PEF1,ENSG00000162521_RBBP4,ENSG00000162542_TMCO4,ENSG00000162543_UBXN10,ENSG00000162551_ALPL,ENSG00000162585_FAAP20,ENSG00000162591_MEGF6,ENSG00000162599_NFIA,ENSG00000162600_OMA1,ENSG00000162601_MYSM1,ENSG00000162604_TM2D1,ENSG00000162607_USP1,ENSG00000162613_FUBP1,ENSG00000162614_NEXN,ENSG00000162616_DNAJB4,ENSG00000162623_TYW3,ENSG00000162636_FAM102B,ENSG00000162639_HENMT1,ENSG00000162642_C1orf52,ENSG00000162645_GBP2,ENSG00000162650_ATXN7L2,ENSG00000162654_GBP4,ENSG00000162664_ZNF326,ENSG00000162676_GFI1,ENSG00000162688_AGL,ENSG00000162694_EXTL2,ENSG00000162695_SLC30A7,ENSG00000162702_ZNF281,ENSG00000162704_ARPC5,ENSG00000162711_NLRP3,ENSG00000162714_ZNF496,ENSG00000162722_TRIM58,ENSG00000162729_IGSF8,ENSG00000162734_PEA15,ENSG00000162735_PEX19,ENSG00000162736_NCSTN,ENSG00000162739_SLAMF6,ENSG00000162745_OLFML2B,ENSG00000162746_FCRLB,ENSG00000162747_FCGR3B,ENSG00000162757_C1orf74,ENSG00000162769_FLVCR1,ENSG00000162772_ATF3,ENSG00000162775_RBM15,ENSG00000162777_DENND2D,ENSG00000162783_IER5,ENSG00000162804_SNED1,ENSG00000162813_BPNT1,ENSG00000162817_C1orf115,ENSG00000162819_BROX,ENSG00000162836_ACP6,ENSG00000162851_TFB2M,ENSG00000162852_CNST,ENSG00000162869_PPP1R21,ENSG00000162881_OXER1,ENSG00000162882_HAAO,ENSG00000162885_B3GALNT2,ENSG00000162889_MAPKAPK2,ENSG00000162894_FCMR,ENSG00000162909_CAPN2,ENSG00000162910_MRPL55,ENSG00000162923_WDR26,ENSG00000162924_REL,ENSG00000162927_PUS10,ENSG00000162928_PEX13,ENSG00000162929_KIAA1841,ENSG00000162946_DISC1,ENSG00000162949_CAPN13,ENSG00000162959_MEMO1,ENSG00000162961_DPY30,ENSG00000162971_TYW5,ENSG00000162972_MAIP1,ENSG00000162976_PQLC3,ENSG00000162980_ARL5A,ENSG00000162994_CLHC1,ENSG00000162999_DUSP19,ENSG00000163001_CFAP36,ENSG00000163002_NUP35,ENSG00000163006_CCDC138,ENSG00000163013_FBXO41,ENSG00000163026_WDCP,ENSG00000163029_SMC6,ENSG00000163041_H3F3A,ENSG00000163050_COQ8A,ENSG00000163053_SLC16A14,ENSG00000163069_SGCB,ENSG00000163082_SGPP2,ENSG00000163083_INHBB,ENSG00000163104_SMARCAD1,ENSG00000163110_PDLIM5,ENSG00000163125_RPRD2,ENSG00000163126_ANKRD23,ENSG00000163131_CTSS,ENSG00000163138_PACRGL,ENSG00000163141_BNIPL,ENSG00000163154_TNFAIP8L2,ENSG00000163155_LYSMD1,ENSG00000163156_SCNM1,ENSG00000163159_VPS72,ENSG00000163161_ERCC3,ENSG00000163162_RNF149,ENSG00000163166_IWS1,ENSG00000163170_BOLA3,ENSG00000163171_CDC42EP3,ENSG00000163191_S100A11,ENSG00000163214_DHX57,ENSG00000163219_ARHGAP25,ENSG00000163220_S100A9,ENSG00000163221_S100A12,ENSG00000163235_TGFA,ENSG00000163249_CCNYL1,ENSG00000163251_FZD5,ENSG00000163257_DCAF16,ENSG00000163281_GNPDA2,ENSG00000163291_PAQR3,ENSG00000163297_ANTXR2,ENSG00000163312_HELQ,ENSG00000163319_MRPS18C,ENSG00000163320_CGGBP1,ENSG00000163322_FAM175A,ENSG00000163328_GPR155,ENSG00000163344_PMVK,ENSG00000163346_PBXIP1,ENSG00000163348_PYGO2,ENSG00000163349_HIPK1,ENSG00000163359_COL6A3,ENSG00000163374_YY1AP1,ENSG00000163376_KBTBD8,ENSG00000163378_EOGT,ENSG00000163382_NAXE,ENSG00000163389_POGLUT1,ENSG00000163393_SLC22A15,ENSG00000163399_ATP1A1,ENSG00000163406_SLC15A2,ENSG00000163412_EIF4E3,ENSG00000163421_PROK2,ENSG00000163428_LRRC58,ENSG00000163430_FSTL1,ENSG00000163444_TMEM183A,ENSG00000163449_TMEM169,ENSG00000163453_IGFBP7,ENSG00000163463_KRTCAP2,ENSG00000163464_CXCR1,ENSG00000163466_ARPC2,ENSG00000163468_CCT3,ENSG00000163472_TMEM79,ENSG00000163479_SSR2,ENSG00000163481_RNF25,ENSG00000163482_STK36,ENSG00000163492_CCDC141,ENSG00000163507_KIAA1524,ENSG00000163508_EOMES,ENSG00000163510_CWC22,ENSG00000163512_AZI2,ENSG00000163513_TGFBR2,ENSG00000163516_ANKZF1,ENSG00000163517_HDAC11,ENSG00000163519_TRAT1,ENSG00000163521_GLB1L,ENSG00000163527_STT3B,ENSG00000163528_CHCHD4,ENSG00000163534_FCRL1,ENSG00000163535_SGO2,ENSG00000163536_SERPINI1,ENSG00000163539_CLASP2,ENSG00000163541_SUCLG1,ENSG00000163545_NUAK2,ENSG00000163554_SPTA1,ENSG00000163558_PRKCI,ENSG00000163563_MNDA,ENSG00000163564_PYHIN1,ENSG00000163565_IFI16,ENSG00000163568_AIM2,ENSG00000163577_EIF5A2,ENSG00000163584_RPL22L1,ENSG00000163590_PPM1L,ENSG00000163596_ICA1L,ENSG00000163599_CTLA4,ENSG00000163600_ICOS,ENSG00000163602_RYBP,ENSG00000163605_PPP4R2,ENSG00000163606_CD200R1,ENSG00000163607_GTPBP8,ENSG00000163608_NEPRO,ENSG00000163611_SPICE1,ENSG00000163617_CCDC191,ENSG00000163625_WDFY3,ENSG00000163626_COX18,ENSG00000163629_PTPN13,ENSG00000163633_C4orf36,ENSG00000163634_THOC7,ENSG00000163635_ATXN7,ENSG00000163636_PSMD6,ENSG00000163644_PPM1K,ENSG00000163655_GMPS,ENSG00000163659_TIPARP,ENSG00000163660_CCNL1,ENSG00000163661_PTX3,ENSG00000163681_SLMAP,ENSG00000163682_RPL9,ENSG00000163683_SMIM14,ENSG00000163684_RPP14,ENSG00000163686_ABHD6,ENSG00000163694_RBM47,ENSG00000163697_APBB2,ENSG00000163702_IL17RC,ENSG00000163703_CRELD1,ENSG00000163704_PRRT3,ENSG00000163710_PCOLCE2,ENSG00000163714_U2SURP,ENSG00000163719_MTMR14,ENSG00000163728_TTC14,ENSG00000163735_CXCL5,ENSG00000163736_PPBP,ENSG00000163737_PF4,ENSG00000163738_MTHFD2L,ENSG00000163739_CXCL1,ENSG00000163743_RCHY1,ENSG00000163746_PLSCR2,ENSG00000163751_CPA3,ENSG00000163754_GYG1,ENSG00000163755_HPS3,ENSG00000163781_TOPBP1,ENSG00000163785_RYK,ENSG00000163788_SNRK,ENSG00000163795_ZNF513,ENSG00000163798_SLC4A1AP,ENSG00000163803_PLB1,ENSG00000163806_SPDYA,ENSG00000163807_KIAA1143,ENSG00000163808_KIF15,ENSG00000163811_WDR43,ENSG00000163812_ZDHHC3,ENSG00000163818_LZTFL1,ENSG00000163820_FYCO1,ENSG00000163823_CCR1,ENSG00000163832_ELP6,ENSG00000163840_DTX3L,ENSG00000163848_ZNF148,ENSG00000163864_NMNAT3,ENSG00000163866_SMIM12,ENSG00000163867_ZMYM6,ENSG00000163870_TPRA1,ENSG00000163872_YEATS2,ENSG00000163874_ZC3H12A,ENSG00000163875_MEAF6,ENSG00000163877_SNIP1,ENSG00000163882_POLR2H,ENSG00000163898_LIPH,ENSG00000163900_TMEM41A,ENSG00000163902_RPN1,ENSG00000163904_SENP2,ENSG00000163913_IFT122,ENSG00000163918_RFC4,ENSG00000163930_BAP1,ENSG00000163931_TKT,ENSG00000163932_PRKCD,ENSG00000163933_RFT1,ENSG00000163935_SFMBT1,ENSG00000163938_GNL3,ENSG00000163939_PBRM1,ENSG00000163945_UVSSA,ENSG00000163946_FAM208A,ENSG00000163947_ARHGEF3,ENSG00000163950_SLBP,ENSG00000163956_LRPAP1,ENSG00000163958_ZDHHC19,ENSG00000163959_SLC51A,ENSG00000163960_UBXN7,ENSG00000163961_RNF168,ENSG00000163964_PIGX,ENSG00000163993_S100P,ENSG00000164002_EXO5,ENSG00000164008_C1orf50,ENSG00000164010_ERMAP,ENSG00000164011_ZNF691,ENSG00000164022_AIMP1,ENSG00000164023_SGMS2,ENSG00000164024_METAP1,ENSG00000164031_DNAJB14,ENSG00000164032_H2AFZ,ENSG00000164038_SLC9B2,ENSG00000164039_BDH2,ENSG00000164040_PGRMC2,ENSG00000164045_CDC25A,ENSG00000164047_CAMP,ENSG00000164048_ZNF589,ENSG00000164051_CCDC51,ENSG00000164054_SHISA5,ENSG00000164056_SPRY1,ENSG00000164062_APEH,ENSG00000164066_INTU,ENSG00000164068_RNF123,ENSG00000164070_HSPA4L,ENSG00000164073_MFSD8,ENSG00000164074_ABHD18,ENSG00000164077_MON1A,ENSG00000164080_RAD54L2,ENSG00000164081_TEX264,ENSG00000164086_DUSP7,ENSG00000164087_POC1A,ENSG00000164088_PPM1M,ENSG00000164091_WDR82,ENSG00000164096_C4orf3,ENSG00000164100_NDST3,ENSG00000164104_HMGB2,ENSG00000164105_SAP30,ENSG00000164109_MAD2L1,ENSG00000164111_ANXA5,ENSG00000164114_MAP9,ENSG00000164116_GUCY1A3,ENSG00000164117_FBXO8,ENSG00000164118_CEP44,ENSG00000164120_HPGD,ENSG00000164124_TMEM144,ENSG00000164125_FAM198B,ENSG00000164134_NAA15,ENSG00000164136_IL15,ENSG00000164142_FAM160A1,ENSG00000164144_ARFIP1,ENSG00000164151_ICE1,ENSG00000164162_ANAPC10,ENSG00000164163_ABCE1,ENSG00000164164_OTUD4,ENSG00000164167_LSM6,ENSG00000164168_TMEM184C,ENSG00000164169_PRMT9,ENSG00000164171_ITGA2,ENSG00000164172_MOCS2,ENSG00000164180_TMEM161B,ENSG00000164181_ELOVL7,ENSG00000164182_NDUFAF2,ENSG00000164187_LMBRD2,ENSG00000164190_NIPBL,ENSG00000164209_SLC25A46,ENSG00000164211_STARD4,ENSG00000164219_PGGT1B,ENSG00000164221_CCDC112,ENSG00000164236_ANKRD33B,ENSG00000164237_CMBL,ENSG00000164241_C5orf63,ENSG00000164244_PRRC1,ENSG00000164251_F2RL1,ENSG00000164252_AGGF1,ENSG00000164253_WDR41,ENSG00000164258_NDUFS4,ENSG00000164284_GRPEL2,ENSG00000164291_ARSK,ENSG00000164292_RHOBTB3,ENSG00000164296_TIGD6,ENSG00000164300_SERINC5,ENSG00000164305_CASP3,ENSG00000164306_PRIMPOL,ENSG00000164307_ERAP1,ENSG00000164308_ERAP2,ENSG00000164309_CMYA5,ENSG00000164323_CFAP97,ENSG00000164327_RICTOR,ENSG00000164329_PAPD4,ENSG00000164330_EBF1,ENSG00000164331_ANKRA2,ENSG00000164332_UBLCP1,ENSG00000164338_UTP15,ENSG00000164342_TLR3,ENSG00000164346_NSA2,ENSG00000164347_GFM2,ENSG00000164366_CCDC127,ENSG00000164398_ACSL6,ENSG00000164402_SEPT8,ENSG00000164403_SHROOM1,ENSG00000164405_UQCRQ,ENSG00000164406_LEAP2,ENSG00000164414_SLC35A1,ENSG00000164430_MB21D1,ENSG00000164440_TXLNB,ENSG00000164442_CITED2,ENSG00000164463_CREBRF,ENSG00000164465_DCBLD1,ENSG00000164466_SFXN1,ENSG00000164483_SAMD3,ENSG00000164494_PDSS2,ENSG00000164506_STXBP5,ENSG00000164512_ANKRD55,ENSG00000164530_PI16,ENSG00000164535_DAGLB,ENSG00000164543_STK17A,ENSG00000164548_TRA2A,ENSG00000164574_GALNT10,ENSG00000164576_SAP30L,ENSG00000164587_RPS14,ENSG00000164597_COG5,ENSG00000164603_BMT2,ENSG00000164609_SLU7,ENSG00000164610_RP9,ENSG00000164611_PTTG1,ENSG00000164615_CAMLG,ENSG00000164620_RELL2,ENSG00000164626_KCNK5,ENSG00000164631_ZNF12,ENSG00000164649_CDCA7L,ENSG00000164654_MIOS,ENSG00000164659_KIAA1324L,ENSG00000164663_USP49,ENSG00000164674_SYTL3,ENSG00000164691_TAGAP,ENSG00000164713_BRI3,ENSG00000164715_LMTK2,ENSG00000164733_CTSB,ENSG00000164741_DLC1,ENSG00000164751_PEX2,ENSG00000164754_RAD21,ENSG00000164758_MED30,ENSG00000164808_SPIDR,ENSG00000164815_ORC5,ENSG00000164818_DNAAF5,ENSG00000164821_DEFA4,ENSG00000164823_OSGIN2,ENSG00000164828_SUN1,ENSG00000164830_OXR1,ENSG00000164849_GPR146,ENSG00000164850_GPER1,ENSG00000164877_MICALL2,ENSG00000164880_INTS1,ENSG00000164885_CDK5,ENSG00000164889_SLC4A2,ENSG00000164896_FASTK,ENSG00000164897_TMUB1,ENSG00000164898_FMC1,ENSG00000164902_PHAX,ENSG00000164916_FOXK1,ENSG00000164919_COX6C,ENSG00000164924_YWHAZ,ENSG00000164930_FZD6,ENSG00000164933_SLC25A32,ENSG00000164934_DCAF13,ENSG00000164938_TP53INP1,ENSG00000164941_INTS8,ENSG00000164944_KIAA1429,ENSG00000164951_PDP1,ENSG00000164953_TMEM67,ENSG00000164961_KIAA0196,ENSG00000164967_RPP25L,ENSG00000164970_FAM219A,ENSG00000164975_SNAPC3,ENSG00000164978_NUDT2,ENSG00000164983_TMEM65,ENSG00000164985_PSIP1,ENSG00000164989_CCDC171,ENSG00000165006_UBAP1,ENSG00000165025_SYK,ENSG00000165029_ABCA1,ENSG00000165030_NFIL3,ENSG00000165046_LETM2,ENSG00000165055_METTL2B,ENSG00000165060_FXN,ENSG00000165071_TMEM71,ENSG00000165092_ALDH1A1,ENSG00000165097_KDM1B,ENSG00000165102_HGSNAT,ENSG00000165113_GKAP1,ENSG00000165115_KIF27,ENSG00000165118_C9orf64,ENSG00000165119_HNRNPK,ENSG00000165138_ANKS6,ENSG00000165140_FBP1,ENSG00000165156_ZHX1,ENSG00000165168_CYBB,ENSG00000165169_DYNLT3,ENSG00000165175_MID1IP1,ENSG00000165185_KIAA1958,ENSG00000165195_PIGA,ENSG00000165209_STRBP,ENSG00000165219_GAPVD1,ENSG00000165233_CARD19,ENSG00000165240_ATP7A,ENSG00000165244_ZNF367,ENSG00000165259_HDX,ENSG00000165264_NDUFB6,ENSG00000165271_NOL6,ENSG00000165272_AQP3,ENSG00000165275_TRMT10B,ENSG00000165280_VCP,ENSG00000165282_PIGO,ENSG00000165283_STOML2,ENSG00000165288_BRWD3,ENSG00000165304_MELK,ENSG00000165312_OTUD1,ENSG00000165322_ARHGAP12,ENSG00000165338_HECTD2,ENSG00000165355_FBXO33,ENSG00000165359_INTS6L,ENSG00000165389_SPTSSA,ENSG00000165392_WRN,ENSG00000165406_MARCH8,ENSG00000165410_CFL2,ENSG00000165416_SUGT1,ENSG00000165417_GTF2A1,ENSG00000165424_ZCCHC24,ENSG00000165434_PGM2L1,ENSG00000165457_FOLR2,ENSG00000165458_INPPL1,ENSG00000165475_CRYL1,ENSG00000165476_REEP3,ENSG00000165480_SKA3,ENSG00000165487_MICU2,ENSG00000165490_DDIAS,ENSG00000165494_PCF11,ENSG00000165501_LRR1,ENSG00000165502_RPL36AL,ENSG00000165506_DNAAF2,ENSG00000165512_ZNF22,ENSG00000165516_KLHDC2,ENSG00000165521_EML5,ENSG00000165525_NEMF,ENSG00000165526_RPUSD4,ENSG00000165527_ARF6,ENSG00000165533_TTC8,ENSG00000165548_TMEM63C,ENSG00000165555_NOXRED1,ENSG00000165568_AKR1E2,ENSG00000165572_KBTBD6,ENSG00000165591_FAAH2,ENSG00000165609_NUDT5,ENSG00000165617_DACT1,ENSG00000165626_BEND7,ENSG00000165629_ATP5C1,ENSG00000165630_PRPF18,ENSG00000165632_TAF3,ENSG00000165637_VDAC2,ENSG00000165644_COMTD1,ENSG00000165646_SLC18A2,ENSG00000165650_PDZD8,ENSG00000165660_FAM175B,ENSG00000165661_QSOX2,ENSG00000165669_FAM204A,ENSG00000165671_NSD1,ENSG00000165672_PRDX3,ENSG00000165675_ENOX2,ENSG00000165678_GHITM,ENSG00000165682_CLEC1B,ENSG00000165684_SNAPC4,ENSG00000165688_PMPCA,ENSG00000165689_SDCCAG3,ENSG00000165699_TSC1,ENSG00000165702_GFI1B,ENSG00000165704_HPRT1,ENSG00000165714_BORCS5,ENSG00000165716_FAM69B,ENSG00000165724_ZMYND19,ENSG00000165732_DDX21,ENSG00000165733_BMS1,ENSG00000165752_STK32C,ENSG00000165775_FUNDC2,ENSG00000165782_TMEM55B,ENSG00000165792_METTL17,ENSG00000165795_NDRG2,ENSG00000165801_ARHGEF40,ENSG00000165802_NSMF,ENSG00000165804_ZNF219,ENSG00000165806_CASP7,ENSG00000165813_CCDC186,ENSG00000165819_METTL3,ENSG00000165832_TRUB1,ENSG00000165861_ZFYVE1,ENSG00000165879_FRAT1,ENSG00000165886_UBTD1,ENSG00000165891_E2F7,ENSG00000165895_ARHGAP42,ENSG00000165898_ISCA2,ENSG00000165914_TTC7B,ENSG00000165915_SLC39A13,ENSG00000165916_PSMC3,ENSG00000165923_AGBL2,ENSG00000165929_TC2N,ENSG00000165934_CPSF2,ENSG00000165943_MOAP1,ENSG00000165948_IFI27L1,ENSG00000165949_IFI27,ENSG00000165959_CLMN,ENSG00000165983_PTER,ENSG00000165996_HACD1,ENSG00000165997_ARL5B,ENSG00000166002_SMCO4,ENSG00000166004_CEP295,ENSG00000166012_TAF1D,ENSG00000166016_ABTB2,ENSG00000166024_R3HCC1L,ENSG00000166025_AMOTL1,ENSG00000166035_LIPC,ENSG00000166037_CEP57,ENSG00000166046_TCP11L2,ENSG00000166068_SPRED1,ENSG00000166086_JAM3,ENSG00000166091_CMTM5,ENSG00000166123_GPT2,ENSG00000166128_RAB8B,ENSG00000166130_IKBIP,ENSG00000166133_RPUSD2,ENSG00000166135_HIF1AN,ENSG00000166136_NDUFB8,ENSG00000166140_ZFYVE19,ENSG00000166145_SPINT1,ENSG00000166147_FBN1,ENSG00000166148_AVPR1A,ENSG00000166164_BRD7,ENSG00000166165_CKB,ENSG00000166166_TRMT61A,ENSG00000166167_BTRC,ENSG00000166169_POLL,ENSG00000166170_BAG5,ENSG00000166171_DPCD,ENSG00000166181_API5,ENSG00000166188_ZNF319,ENSG00000166189_HPS6,ENSG00000166192_SENP8,ENSG00000166197_NOLC1,ENSG00000166199_ALKBH3,ENSG00000166200_COPS2,ENSG00000166224_SGPL1,ENSG00000166225_FRS2,ENSG00000166226_CCT2,ENSG00000166228_PCBD1,ENSG00000166233_ARIH1,ENSG00000166260_COX11,ENSG00000166261_ZNF202,ENSG00000166262_FAM227B,ENSG00000166263_STXBP4,ENSG00000166265_CYYR1,ENSG00000166266_CUL5,ENSG00000166272_WBP1L,ENSG00000166275_BORCS7,ENSG00000166278_C2,ENSG00000166289_PLEKHF1,ENSG00000166295_ANAPC16,ENSG00000166311_SMPD1,ENSG00000166313_APBB1,ENSG00000166321_NUDT13,ENSG00000166326_TRIM44,ENSG00000166333_ILK,ENSG00000166337_TAF10,ENSG00000166340_TPP1,ENSG00000166341_DCHS1,ENSG00000166342_NETO1,ENSG00000166343_MSS51,ENSG00000166347_CYB5A,ENSG00000166348_USP54,ENSG00000166352_C11orf74,ENSG00000166377_ATP9B,ENSG00000166387_PPFIBP2,ENSG00000166394_CYB5R2,ENSG00000166398_KIAA0355,ENSG00000166401_SERPINB8,ENSG00000166405_RIC3,ENSG00000166411_IDH3A,ENSG00000166428_PLD4,ENSG00000166432_ZMAT1,ENSG00000166435_XRRA1,ENSG00000166436_TRIM66,ENSG00000166439_RNF169,ENSG00000166441_RPL27A,ENSG00000166446_CDYL2,ENSG00000166451_CENPN,ENSG00000166452_AKIP1,ENSG00000166454_ATMIN,ENSG00000166471_TMEM41B,ENSG00000166477_LEO1,ENSG00000166478_ZNF143,ENSG00000166479_TMX3,ENSG00000166483_WEE1,ENSG00000166484_MAPK7,ENSG00000166501_PRKCB,ENSG00000166503_RP11-382A20.3,ENSG00000166507_NDST2,ENSG00000166508_MCM7,ENSG00000166523_CLEC4E,ENSG00000166526_ZNF3,ENSG00000166527_CLEC4D,ENSG00000166529_ZSCAN21,ENSG00000166532_RIMKLB,ENSG00000166548_TK2,ENSG00000166557_TMED3,ENSG00000166562_SEC11C,ENSG00000166575_TMEM135,ENSG00000166579_NDEL1,ENSG00000166582_CENPV,ENSG00000166595_FAM96B,ENSG00000166598_HSP90B1,ENSG00000166619_BLCAP,ENSG00000166669_ATF7IP2,ENSG00000166681_BEX3,ENSG00000166685_COG1,ENSG00000166689_PLEKHA7,ENSG00000166704_ZNF606,ENSG00000166707_ZCCHC18,ENSG00000166710_B2M,ENSG00000166716_ZNF592,ENSG00000166734_CASC4,ENSG00000166747_AP1G1,ENSG00000166750_SLFN5,ENSG00000166762_CATSPER2,ENSG00000166783_KIAA0430,ENSG00000166788_SAAL1,ENSG00000166793_YPEL4,ENSG00000166794_PPIB,ENSG00000166797_FAM96A,ENSG00000166801_FAM111A,ENSG00000166803_KIAA0101,ENSG00000166821_PEX11A,ENSG00000166822_TMEM170A,ENSG00000166825_ANPEP,ENSG00000166839_ANKDD1A,ENSG00000166845_C18orf54,ENSG00000166847_DCTN5,ENSG00000166848_TERF2IP,ENSG00000166851_PLK1,ENSG00000166855_CLPX,ENSG00000166860_ZBTB39,ENSG00000166881_NEMP1,ENSG00000166886_NAB2,ENSG00000166887_VPS39,ENSG00000166888_STAT6,ENSG00000166889_PATL1,ENSG00000166896_ATP23,ENSG00000166900_STX3,ENSG00000166902_MRPL16,ENSG00000166908_PIP4K2C,ENSG00000166912_MTMR10,ENSG00000166913_YWHAB,ENSG00000166925_TSC22D4,ENSG00000166927_MS4A7,ENSG00000166928_MS4A14,ENSG00000166938_DIS3L,ENSG00000166946_CCNDBP1,ENSG00000166947_EPB42,ENSG00000166949_SMAD3,ENSG00000166963_MAP1A,ENSG00000166965_RCCD1,ENSG00000166971_AKTIP,ENSG00000166974_MAPRE2,ENSG00000166979_EVA1C,ENSG00000166986_MARS,ENSG00000166987_MBD6,ENSG00000166997_CNPY4,ENSG00000167004_PDIA3,ENSG00000167005_NUDT21,ENSG00000167034_NKX3-1,ENSG00000167037_SGSM1,ENSG00000167065_DUSP18,ENSG00000167074_TEF,ENSG00000167077_MEI1,ENSG00000167081_PBX3,ENSG00000167083_GNGT2,ENSG00000167085_PHB,ENSG00000167088_SNRPD1,ENSG00000167094_TTC16,ENSG00000167106_FAM102A,ENSG00000167107_ACSF2,ENSG00000167110_GOLGA2,ENSG00000167112_TRUB2,ENSG00000167113_COQ4,ENSG00000167114_SLC27A4,ENSG00000167118_URM1,ENSG00000167130_DOLPP1,ENSG00000167136_ENDOG,ENSG00000167173_C15orf39,ENSG00000167182_SP2,ENSG00000167186_COQ7,ENSG00000167193_CRK,ENSG00000167196_FBXO22,ENSG00000167202_TBC1D2B,ENSG00000167207_NOD2,ENSG00000167208_SNX20,ENSG00000167210_LOXHD1,ENSG00000167220_HDHD2,ENSG00000167232_ZNF91,ENSG00000167257_RNF214,ENSG00000167258_CDK12,ENSG00000167261_DPEP2,ENSG00000167264_DUS2,ENSG00000167272_POP5,ENSG00000167280_ENGASE,ENSG00000167283_ATP5L,ENSG00000167286_CD3D,ENSG00000167291_TBC1D16,ENSG00000167302_TEPSIN,ENSG00000167315_ACAA2,ENSG00000167323_STIM1,ENSG00000167325_RRM1,ENSG00000167333_TRIM68,ENSG00000167377_ZNF23,ENSG00000167378_IRGQ,ENSG00000167380_ZNF226,ENSG00000167384_ZNF180,ENSG00000167393_PPP2R3B,ENSG00000167394_ZNF668,ENSG00000167395_ZNF646,ENSG00000167397_VKORC1,ENSG00000167434_CA4,ENSG00000167447_SMG8,ENSG00000167460_TPM4,ENSG00000167461_RAB8A,ENSG00000167468_GPX4,ENSG00000167470_MIDN,ENSG00000167483_FAM129C,ENSG00000167487_KLHL26,ENSG00000167491_GATAD2A,ENSG00000167508_MVD,ENSG00000167515_TRAPPC2L,ENSG00000167522_ANKRD11,ENSG00000167523_SPATA33,ENSG00000167524_SGK494,ENSG00000167525_PROCA1,ENSG00000167526_RPL13,ENSG00000167528_ZNF641,ENSG00000167535_CACNB3,ENSG00000167536_DHRS13,ENSG00000167543_TP53I13,ENSG00000167548_KMT2D,ENSG00000167549_CORO6,ENSG00000167552_TUBA1A,ENSG00000167553_TUBA1C,ENSG00000167555_ZNF528,ENSG00000167562_ZNF701,ENSG00000167565_SERTAD3,ENSG00000167566_NCKAP5L,ENSG00000167578_RAB4B,ENSG00000167595_PROSER3,ENSG00000167604_NFKBID,ENSG00000167608_TMC4,ENSG00000167613_LAIR1,ENSG00000167615_LENG8,ENSG00000167618_LAIR2,ENSG00000167625_ZNF526,ENSG00000167632_TRAPPC9,ENSG00000167635_ZNF146,ENSG00000167637_ZNF283,ENSG00000167642_SPINT2,ENSG00000167645_YIF1B,ENSG00000167657_DAPK3,ENSG00000167658_EEF2,ENSG00000167664_TMIGD2,ENSG00000167670_CHAF1A,ENSG00000167671_UBXN6,ENSG00000167674_CTB-50L17.10,ENSG00000167676_PLIN4,ENSG00000167680_SEMA6B,ENSG00000167685_ZNF444,ENSG00000167699_GLOD4,ENSG00000167700_MFSD3,ENSG00000167702_KIFC2,ENSG00000167703_SLC43A2,ENSG00000167705_RILP,ENSG00000167716_WDR81,ENSG00000167720_SRR,ENSG00000167721_TSR1,ENSG00000167740_CYB5D2,ENSG00000167747_C19orf48,ENSG00000167766_ZNF83,ENSG00000167768_KRT1,ENSG00000167770_OTUB1,ENSG00000167775_CD320,ENSG00000167778_SPRYD3,ENSG00000167785_ZNF558,ENSG00000167792_NDUFV1,ENSG00000167797_CDK2AP2,ENSG00000167815_PRDX2,ENSG00000167840_ZNF232,ENSG00000167842_MIS12,ENSG00000167850_CD300C,ENSG00000167851_CD300A,ENSG00000167862_MRPL58,ENSG00000167863_ATP5H,ENSG00000167874_TMEM88,ENSG00000167881_SRP68,ENSG00000167895_TMC8,ENSG00000167900_TK1,ENSG00000167904_TMEM68,ENSG00000167925_GHDC,ENSG00000167930_FAM234A,ENSG00000167962_ZNF598,ENSG00000167965_MLST8,ENSG00000167967_E4F1,ENSG00000167968_DNASE1L2,ENSG00000167969_ECI1,ENSG00000167972_ABCA3,ENSG00000167977_KCTD5,ENSG00000167978_SRRM2,ENSG00000167981_ZNF597,ENSG00000167984_NLRC3,ENSG00000167985_SDHAF2,ENSG00000167986_DDB1,ENSG00000167987_VPS37C,ENSG00000167994_RAB3IL1,ENSG00000167995_BEST1,ENSG00000167996_FTH1,ENSG00000168000_BSCL2,ENSG00000168002_POLR2G,ENSG00000168003_SLC3A2,ENSG00000168005_C11orf84,ENSG00000168010_ATG16L2,ENSG00000168014_C2CD3,ENSG00000168016_TRANK1,ENSG00000168026_TTC21A,ENSG00000168028_RPSA,ENSG00000168036_CTNNB1,ENSG00000168038_ULK4,ENSG00000168040_FADD,ENSG00000168056_LTBP3,ENSG00000168060_NAALADL1,ENSG00000168061_SAC3D1,ENSG00000168062_BATF2,ENSG00000168066_SF1,ENSG00000168067_MAP4K2,ENSG00000168071_CCDC88B,ENSG00000168090_COPS6,ENSG00000168092_PAFAH1B2,ENSG00000168096_ANKS3,ENSG00000168101_NUDT16L1,ENSG00000168116_KIAA1586,ENSG00000168118_RAB4A,ENSG00000168137_SETD5,ENSG00000168152_THAP9,ENSG00000168159_RNF187,ENSG00000168172_HOOK3,ENSG00000168175_MAPK1IP1L,ENSG00000168209_DDIT4,ENSG00000168214_RBPJ,ENSG00000168216_LMBRD1,ENSG00000168228_ZCCHC4,ENSG00000168229_PTGDR,ENSG00000168234_TTC39C,ENSG00000168237_GLYCTK,ENSG00000168246_UBTD2,ENSG00000168255_POLR2J3,ENSG00000168256_NKIRAS2,ENSG00000168259_DNAJC7,ENSG00000168264_IRF2BP2,ENSG00000168268_NT5DC2,ENSG00000168273_SMIM4,ENSG00000168275_COA6,ENSG00000168280_KIF5C,ENSG00000168282_MGAT2,ENSG00000168283_BMI1,ENSG00000168286_THAP11,ENSG00000168288_MMADHC,ENSG00000168291_PDHB,ENSG00000168297_PXK,ENSG00000168298_HIST1H1E,ENSG00000168300_PCMTD1,ENSG00000168301_KCTD6,ENSG00000168303_MPLKIP,ENSG00000168310_IRF2,ENSG00000168329_CX3CR1,ENSG00000168374_ARF4,ENSG00000168385_SEPT2,ENSG00000168389_MFSD2A,ENSG00000168393_DTYMK,ENSG00000168394_TAP1,ENSG00000168395_ING5,ENSG00000168397_ATG4B,ENSG00000168404_MLKL,ENSG00000168411_RFWD3,ENSG00000168421_RHOH,ENSG00000168434_COG7,ENSG00000168438_CDC40,ENSG00000168439_STIP1,ENSG00000168461_RAB31,ENSG00000168476_REEP4,ENSG00000168477_TNXB,ENSG00000168487_BMP1,ENSG00000168488_ATXN2L,ENSG00000168495_POLR3D,ENSG00000168496_FEN1,ENSG00000168497_SDPR,ENSG00000168517_HEXIM2,ENSG00000168522_FNTA,ENSG00000168528_SERINC2,ENSG00000168538_TRAPPC11,ENSG00000168556_ING2,ENSG00000168564_CDKN2AIP,ENSG00000168566_SNRNP48,ENSG00000168569_TMEM223,ENSG00000168575_SLC20A2,ENSG00000168591_TMUB2,ENSG00000168610_STAT3,ENSG00000168612_ZSWIM1,ENSG00000168615_ADAM9,ENSG00000168646_AXIN2,ENSG00000168653_NDUFS5,ENSG00000168661_ZNF30,ENSG00000168672_FAM84B,ENSG00000168675_LDLRAD4,ENSG00000168679_SLC16A4,ENSG00000168685_IL7R,ENSG00000168701_TMEM208,ENSG00000168710_AHCYL1,ENSG00000168724_DNAJC21,ENSG00000168734_PKIG,ENSG00000168758_SEMA4C,ENSG00000168763_CNNM3,ENSG00000168765_GSTM4,ENSG00000168769_TET2,ENSG00000168779_SHOX2,ENSG00000168781_PPIP5K1,ENSG00000168785_TSPAN5,ENSG00000168792_ABHD15,ENSG00000168795_ZBTB5,ENSG00000168802_CHTF8,ENSG00000168803_ADAL,ENSG00000168806_LCMT2,ENSG00000168807_SNTB2,ENSG00000168813_ZNF507,ENSG00000168818_STX18,ENSG00000168824_NSG1,ENSG00000168826_ZBTB49,ENSG00000168827_GFM1,ENSG00000168872_DDX19A,ENSG00000168876_ANKRD49,ENSG00000168883_USP39,ENSG00000168884_TNIP2,ENSG00000168887_C2orf68,ENSG00000168890_TMEM150A,ENSG00000168894_RNF181,ENSG00000168899_VAMP5,ENSG00000168903_BTNL3,ENSG00000168904_LRRC28,ENSG00000168906_MAT2A,ENSG00000168916_ZNF608,ENSG00000168918_INPP5D,ENSG00000168924_LETM1,ENSG00000168936_TMEM129,ENSG00000168939_SPRY3,ENSG00000168944_CEP120,ENSG00000168958_MFF,ENSG00000168961_LGALS9,ENSG00000168970_JMJD7-PLA2G4B,ENSG00000168995_SIGLEC7,ENSG00000169016_E2F6,ENSG00000169018_FEM1B,ENSG00000169019_COMMD8,ENSG00000169020_ATP5I,ENSG00000169021_UQCRFS1,ENSG00000169026_MFSD7,ENSG00000169031_COL4A3,ENSG00000169032_MAP2K1,ENSG00000169045_HNRNPH1,ENSG00000169047_IRS1,ENSG00000169057_MECP2,ENSG00000169062_UPF3A,ENSG00000169084_DHRSX,ENSG00000169087_HSPBAP1,ENSG00000169093_ASMTL,ENSG00000169100_SLC25A6,ENSG00000169105_CHST14,ENSG00000169118_CSNK1G1,ENSG00000169122_FAM110B,ENSG00000169129_AFAP1L2,ENSG00000169131_ZNF354A,ENSG00000169136_ATF5,ENSG00000169139_UBE2V2,ENSG00000169155_ZBTB43,ENSG00000169174_PCSK9,ENSG00000169180_XPO6,ENSG00000169188_APEX2,ENSG00000169189_NSMCE1,ENSG00000169193_CCDC126,ENSG00000169217_CD2BP2,ENSG00000169220_RGS14,ENSG00000169221_TBC1D10B,ENSG00000169223_LMAN2,ENSG00000169224_GCSAML,ENSG00000169228_RAB24,ENSG00000169230_PRELID1,ENSG00000169231_THBS3,ENSG00000169239_CA5B,ENSG00000169241_SLC50A1,ENSG00000169242_EFNA1,ENSG00000169247_SH3TC2,ENSG00000169249_ZRSR2,ENSG00000169251_NMD3,ENSG00000169252_ADRB2,ENSG00000169255_B3GALNT1,ENSG00000169258_GPRIN1,ENSG00000169288_MRPL1,ENSG00000169299_PGM2,ENSG00000169313_P2RY12,ENSG00000169359_SLC33A1,ENSG00000169371_SNUPN,ENSG00000169372_CRADD,ENSG00000169375_SIN3A,ENSG00000169379_ARL13B,ENSG00000169385_RNASE2,ENSG00000169397_RNASE3,ENSG00000169398_PTK2,ENSG00000169403_PTAFR,ENSG00000169410_PTPN9,ENSG00000169413_RNASE6,ENSG00000169429_CXCL8,ENSG00000169432_SCN9A,ENSG00000169442_CD52,ENSG00000169446_MMGT1,ENSG00000169490_TM2D2,ENSG00000169499_PLEKHA2,ENSG00000169504_CLIC4,ENSG00000169507_SLC38A11,ENSG00000169508_GPR183,ENSG00000169519_METTL15,ENSG00000169554_ZEB2,ENSG00000169564_PCBP1,ENSG00000169567_HINT1,ENSG00000169570_DTWD2,ENSG00000169592_INO80E,ENSG00000169598_DFFB,ENSG00000169599_NFU1,ENSG00000169607_CKAP2L,ENSG00000169609_C15orf40,ENSG00000169612_FAM103A1,ENSG00000169621_APLF,ENSG00000169629_RGPD8,ENSG00000169635_HIC2,ENSG00000169641_LUZP1,ENSG00000169660_HEXDC,ENSG00000169679_BUB1,ENSG00000169683_LRRC45,ENSG00000169684_CHRNA5,ENSG00000169689_CENPX,ENSG00000169692_AGPAT2,ENSG00000169696_ASPSCR1,ENSG00000169704_GP9,ENSG00000169710_FASN,ENSG00000169714_CNBP,ENSG00000169718_DUS1L,ENSG00000169727_GPS1,ENSG00000169733_RFNG,ENSG00000169738_DCXR,ENSG00000169740_ZNF32,ENSG00000169756_LIMS1,ENSG00000169762_TAPT1,ENSG00000169764_UGP2,ENSG00000169813_HNRNPF,ENSG00000169814_BTD,ENSG00000169826_CSGALNACT2,ENSG00000169857_AVEN,ENSG00000169860_P2RY1,ENSG00000169871_TRIM56,ENSG00000169877_AHSP,ENSG00000169891_REPS2,ENSG00000169895_SYAP1,ENSG00000169896_ITGAM,ENSG00000169902_TPST1,ENSG00000169905_TOR1AIP2,ENSG00000169914_OTUD3,ENSG00000169918_OTUD7A,ENSG00000169919_GUSB,ENSG00000169925_BRD3,ENSG00000169926_KLF13,ENSG00000169951_ZNF764,ENSG00000169955_ZNF747,ENSG00000169957_ZNF768,ENSG00000169964_TMEM42,ENSG00000169967_MAP3K2,ENSG00000169972_PUSL1,ENSG00000169976_SF3B5,ENSG00000169981_ZNF35,ENSG00000169991_IFFO2,ENSG00000169994_MYO7B,ENSG00000170004_CHD3,ENSG00000170006_TMEM154,ENSG00000170017_ALCAM,ENSG00000170027_YWHAG,ENSG00000170035_UBE2E3,ENSG00000170037_CNTROB,ENSG00000170043_TRAPPC1,ENSG00000170049_KCNAB3,ENSG00000170074_FAM153A,ENSG00000170085_SIMC1,ENSG00000170088_TMEM192,ENSG00000170100_ZNF778,ENSG00000170113_NIPA1,ENSG00000170142_UBE2E1,ENSG00000170144_HNRNPA3,ENSG00000170145_SIK2,ENSG00000170160_CCDC144A,ENSG00000170175_CHRNB1,ENSG00000170180_GYPA,ENSG00000170185_USP38,ENSG00000170190_SLC16A5,ENSG00000170191_NANP,ENSG00000170222_ADPRM,ENSG00000170234_PWWP2A,ENSG00000170242_USP47,ENSG00000170248_PDCD6IP,ENSG00000170260_ZNF212,ENSG00000170265_ZNF282,ENSG00000170266_GLB1,ENSG00000170270_GON7,ENSG00000170271_FAXDC2,ENSG00000170275_CRTAP,ENSG00000170291_ELP5,ENSG00000170296_GABARAP,ENSG00000170310_STX8,ENSG00000170312_CDK1,ENSG00000170315_UBB,ENSG00000170322_NFRKB,ENSG00000170325_PRDM10,ENSG00000170340_B3GNT2,ENSG00000170345_FOS,ENSG00000170348_TMED10,ENSG00000170364_SETMAR,ENSG00000170365_SMAD1,ENSG00000170379_TCAF2,ENSG00000170385_SLC30A1,ENSG00000170396_ZNF804A,ENSG00000170412_GPRC5C,ENSG00000170417_TMEM182,ENSG00000170425_ADORA2B,ENSG00000170430_MGMT,ENSG00000170439_METTL7B,ENSG00000170445_HARS,ENSG00000170448_NFXL1,ENSG00000170456_DENND5B,ENSG00000170458_CD14,ENSG00000170464_DNAJC18,ENSG00000170468_C14orf169,ENSG00000170471_RALGAPB,ENSG00000170473_PYM1,ENSG00000170476_MZB1,ENSG00000170502_NUDT9,ENSG00000170509_HSD17B13,ENSG00000170515_PA2G4,ENSG00000170522_ELOVL6,ENSG00000170525_PFKFB3,ENSG00000170540_ARL6IP1,ENSG00000170542_SERPINB9,ENSG00000170545_SMAGP,ENSG00000170571_EMB,ENSG00000170581_STAT2,ENSG00000170584_NUDCD2,ENSG00000170604_IRF2BP1,ENSG00000170606_HSPA4,ENSG00000170619_COMMD5,ENSG00000170627_GTSF1,ENSG00000170631_ZNF16,ENSG00000170632_ARMC10,ENSG00000170633_RNF34,ENSG00000170634_ACYP2,ENSG00000170638_TRABD,ENSG00000170653_ATF7,ENSG00000170677_SOCS6,ENSG00000170734_POLH,ENSG00000170759_KIF5B,ENSG00000170776_AKAP13,ENSG00000170779_CDCA4,ENSG00000170791_CHCHD7,ENSG00000170802_FOXN2,ENSG00000170832_USP32,ENSG00000170836_PPM1D,ENSG00000170837_GPR27,ENSG00000170852_KBTBD2,ENSG00000170854_MINA,ENSG00000170855_TRIAP1,ENSG00000170860_LSM3,ENSG00000170871_KIAA0232,ENSG00000170873_MTSS1,ENSG00000170876_TMEM43,ENSG00000170881_RNF139,ENSG00000170889_RPS9,ENSG00000170892_TSEN34,ENSG00000170903_MSANTD4,ENSG00000170906_NDUFA3,ENSG00000170909_OSCAR,ENSG00000170915_PAQR8,ENSG00000170917_NUDT6,ENSG00000170921_TANC2,ENSG00000170946_DNAJC24,ENSG00000170949_ZNF160,ENSG00000170954_ZNF415,ENSG00000170955_PRKCDBP,ENSG00000170956_CEACAM3,ENSG00000170962_PDGFD,ENSG00000170989_S1PR1,ENSG00000171033_PKIA,ENSG00000171044_XKR6,ENSG00000171045_TSNARE1,ENSG00000171049_FPR2,ENSG00000171051_FPR1,ENSG00000171055_FEZ2,ENSG00000171067_C11orf24,ENSG00000171097_KYAT1,ENSG00000171100_MTM1,ENSG00000171103_TRMT61B,ENSG00000171105_INSR,ENSG00000171109_MFN1,ENSG00000171115_GIMAP8,ENSG00000171121_KCNMB3,ENSG00000171130_ATP6V0E2,ENSG00000171132_PRKCE,ENSG00000171135_JAGN1,ENSG00000171148_TADA3,ENSG00000171150_SOCS5,ENSG00000171155_C1GALT1C1,ENSG00000171159_C9orf16,ENSG00000171161_ZNF672,ENSG00000171163_ZNF692,ENSG00000171169_NAIF1,ENSG00000171174_RBKS,ENSG00000171202_TMEM126A,ENSG00000171204_TMEM126B,ENSG00000171206_TRIM8,ENSG00000171208_NETO2,ENSG00000171219_CDC42BPG,ENSG00000171222_SCAND1,ENSG00000171223_JUNB,ENSG00000171236_LRG1,ENSG00000171241_SHCBP1,ENSG00000171262_FAM98B,ENSG00000171291_ZNF439,ENSG00000171295_ZNF440,ENSG00000171298_GAA,ENSG00000171302_CANT1,ENSG00000171307_ZDHHC16,ENSG00000171310_CHST11,ENSG00000171311_EXOSC1,ENSG00000171314_PGAM1,ENSG00000171316_CHD7,ENSG00000171320_ESCO2,ENSG00000171365_CLCN5,ENSG00000171421_MRPL36,ENSG00000171425_ZNF581,ENSG00000171428_NAT1,ENSG00000171443_ZNF524,ENSG00000171444_MCC,ENSG00000171448_ZBTB26,ENSG00000171451_DSEL,ENSG00000171453_POLR1C,ENSG00000171456_ASXL1,ENSG00000171466_ZNF562,ENSG00000171467_ZNF318,ENSG00000171469_ZNF561,ENSG00000171475_WIPF2,ENSG00000171476_HOPX,ENSG00000171488_LRRC8C,ENSG00000171490_RSL1D1,ENSG00000171492_LRRC8D,ENSG00000171497_PPID,ENSG00000171502_COL24A1,ENSG00000171503_ETFDH,ENSG00000171522_PTGER4,ENSG00000171530_TBCA,ENSG00000171552_BCL2L1,ENSG00000171566_PLRG1,ENSG00000171574_ZNF584,ENSG00000171596_NMUR1,ENSG00000171603_CLSTN1,ENSG00000171604_CXXC5,ENSG00000171606_ZNF274,ENSG00000171608_PIK3CD,ENSG00000171611_PTCRA,ENSG00000171612_SLC25A33,ENSG00000171617_ENC1,ENSG00000171621_SPSB1,ENSG00000171634_BPTF,ENSG00000171643_S100Z,ENSG00000171649_ZIK1,ENSG00000171657_GPR82,ENSG00000171659_GPR34,ENSG00000171681_ATF7IP,ENSG00000171700_RGS19,ENSG00000171703_TCEA2,ENSG00000171714_ANO5,ENSG00000171720_HDAC3,ENSG00000171723_GPHN,ENSG00000171735_CAMTA1,ENSG00000171763_SPATA5L1,ENSG00000171766_GATM,ENSG00000171777_RASGRP4,ENSG00000171791_BCL2,ENSG00000171792_RHNO1,ENSG00000171793_CTPS1,ENSG00000171806_METTL18,ENSG00000171812_COL8A2,ENSG00000171813_PWWP2B,ENSG00000171817_ZNF540,ENSG00000171823_FBXL14,ENSG00000171824_EXOSC10,ENSG00000171827_ZNF570,ENSG00000171840_NINJ2,ENSG00000171843_MLLT3,ENSG00000171848_RRM2,ENSG00000171853_TRAPPC12,ENSG00000171858_RPS21,ENSG00000171860_C3AR1,ENSG00000171861_MRM3,ENSG00000171862_PTEN,ENSG00000171863_RPS7,ENSG00000171865_RNASEH1,ENSG00000171867_PRNP,ENSG00000171914_TLN2,ENSG00000171928_TVP23B,ENSG00000171940_ZNF217,ENSG00000171943_SRGAP2C,ENSG00000171953_ATPAF2,ENSG00000171960_PPIH,ENSG00000171970_ZNF57,ENSG00000171984_C20orf196,ENSG00000171988_JMJD1C,ENSG00000172005_MAL,ENSG00000172006_ZNF554,ENSG00000172007_RAB33B,ENSG00000172009_THOP1,ENSG00000172037_LAMB2,ENSG00000172046_USP19,ENSG00000172053_QARS,ENSG00000172057_ORMDL3,ENSG00000172059_KLF11,ENSG00000172071_EIF2AK3,ENSG00000172081_MOB3A,ENSG00000172086_KRCC1,ENSG00000172113_NME6,ENSG00000172115_CYCS,ENSG00000172116_CD8B,ENSG00000172123_SLFN12,ENSG00000172159_FRMD3,ENSG00000172164_SNTB1,ENSG00000172167_MTBP,ENSG00000172171_TEFM,ENSG00000172172_MRPL13,ENSG00000172175_MALT1,ENSG00000172183_ISG20,ENSG00000172197_MBOAT1,ENSG00000172215_CXCR6,ENSG00000172216_CEBPB,ENSG00000172232_AZU1,ENSG00000172239_PAIP1,ENSG00000172243_CLEC7A,ENSG00000172244_C5orf34,ENSG00000172262_ZNF131,ENSG00000172264_MACROD2,ENSG00000172269_DPAGT1,ENSG00000172270_BSG,ENSG00000172273_HINFP,ENSG00000172292_CERS6,ENSG00000172301_COPRS,ENSG00000172315_TP53RK,ENSG00000172322_CLEC12A,ENSG00000172331_BPGM,ENSG00000172336_POP7,ENSG00000172339_ALG14,ENSG00000172340_SUCLG2,ENSG00000172345_STARD5,ENSG00000172349_IL16,ENSG00000172354_GNB2,ENSG00000172366_MCRIP2,ENSG00000172375_C2CD2L,ENSG00000172382_PRSS27,ENSG00000172403_SYNPO2,ENSG00000172409_CLP1,ENSG00000172426_RSPH9,ENSG00000172428_COPS9,ENSG00000172432_GTPBP2,ENSG00000172456_FGGY,ENSG00000172465_TCEAL1,ENSG00000172466_ZNF24,ENSG00000172469_MANEA,ENSG00000172493_AFF1,ENSG00000172500_FIBP,ENSG00000172530_BANP,ENSG00000172531_PPP1CA,ENSG00000172534_HCFC1,ENSG00000172543_CTSW,ENSG00000172572_PDE3A,ENSG00000172575_RASGRP1,ENSG00000172578_KLHL6,ENSG00000172586_CHCHD1,ENSG00000172590_MRPL52,ENSG00000172594_SMPDL3A,ENSG00000172613_RAD9A,ENSG00000172638_EFEMP2,ENSG00000172661_FAM21C,ENSG00000172663_TMEM134,ENSG00000172667_ZMAT3,ENSG00000172671_ZFAND4,ENSG00000172673_THEMIS,ENSG00000172687_ZNF738,ENSG00000172716_SLFN11,ENSG00000172725_CORO1B,ENSG00000172728_FUT10,ENSG00000172732_MUS81,ENSG00000172748_ZNF596,ENSG00000172757_CFL1,ENSG00000172765_TMCC1,ENSG00000172766_NAA16,ENSG00000172771_EFCAB12,ENSG00000172775_FAM192A,ENSG00000172780_RAB43,ENSG00000172785_CBWD1,ENSG00000172794_RAB37,ENSG00000172795_DCP2,ENSG00000172809_RPL38,ENSG00000172819_RARG,ENSG00000172824_CES4A,ENSG00000172830_SSH3,ENSG00000172831_CES2,ENSG00000172840_PDP2,ENSG00000172845_SP3,ENSG00000172869_DMXL1,ENSG00000172878_METAP1D,ENSG00000172888_ZNF621,ENSG00000172889_EGFL7,ENSG00000172890_NADSYN1,ENSG00000172893_DHCR7,ENSG00000172915_NBEA,ENSG00000172922_RNASEH2C,ENSG00000172932_ANKRD13D,ENSG00000172936_MYD88,ENSG00000172939_OXSR1,ENSG00000172943_PHF8,ENSG00000172954_LCLAT1,ENSG00000172967_XKR3,ENSG00000172977_KAT5,ENSG00000172985_SH3RF3,ENSG00000172992_DCAKD,ENSG00000173011_TADA2B,ENSG00000173020_GRK2,ENSG00000173039_RELA,ENSG00000173041_ZNF680,ENSG00000173064_HECTD4,ENSG00000173065_FAM222B,ENSG00000173068_BNC2,ENSG00000173083_HPSE,ENSG00000173085_COQ2,ENSG00000173110_HSPA6,ENSG00000173113_TRMT112,ENSG00000173114_LRRN3,ENSG00000173120_KDM2A,ENSG00000173137_ADCK5,ENSG00000173141_MRPL57,ENSG00000173145_NOC3L,ENSG00000173153_ESRRA,ENSG00000173163_COMMD1,ENSG00000173166_RAPH1,ENSG00000173171_MTX1,ENSG00000173193_PARP14,ENSG00000173198_CYSLTR1,ENSG00000173200_PARP15,ENSG00000173208_ABCD2,ENSG00000173209_AHSA2,ENSG00000173210_ABLIM3,ENSG00000173212_MAB21L3,ENSG00000173214_MFSD4B,ENSG00000173218_VANGL1,ENSG00000173221_GLRX,ENSG00000173226_IQCB1,ENSG00000173230_GOLGB1,ENSG00000173258_ZNF483,ENSG00000173262_SLC2A14,ENSG00000173264_GPR137,ENSG00000173272_MZT2A,ENSG00000173273_TNKS,ENSG00000173275_ZNF449,ENSG00000173276_ZBTB21,ENSG00000173281_PPP1R3B,ENSG00000173327_MAP3K11,ENSG00000173334_TRIB1,ENSG00000173349_SFT2D3,ENSG00000173369_C1QB,ENSG00000173372_C1QA,ENSG00000173391_OLR1,ENSG00000173402_DAG1,ENSG00000173409_ARV1,ENSG00000173418_NAA20,ENSG00000173436_MINOS1,ENSG00000173442_EHBP1L1,ENSG00000173451_THAP2,ENSG00000173456_RNF26,ENSG00000173457_PPP1R14B,ENSG00000173465_SSSCA1,ENSG00000173473_SMARCC1,ENSG00000173480_ZNF417,ENSG00000173482_PTPRM,ENSG00000173486_FKBP2,ENSG00000173511_VEGFB,ENSG00000173517_PEAK1,ENSG00000173530_TNFRSF10D,ENSG00000173531_MST1,ENSG00000173535_TNFRSF10C,ENSG00000173540_GMPPB,ENSG00000173542_MOB1B,ENSG00000173545_ZNF622,ENSG00000173548_SNX33,ENSG00000173559_NABP1,ENSG00000173575_CHD2,ENSG00000173588_CEP83,ENSG00000173597_SULT1B1,ENSG00000173598_NUDT4,ENSG00000173599_PC,ENSG00000173611_SCAI,ENSG00000173614_NMNAT1,ENSG00000173621_LRFN4,ENSG00000173626_TRAPPC3L,ENSG00000173638_SLC19A1,ENSG00000173653_RCE1,ENSG00000173660_UQCRH,ENSG00000173674_EIF1AX,ENSG00000173681_CXorf23,ENSG00000173692_PSMD1,ENSG00000173706_HEG1,ENSG00000173715_C11orf80,ENSG00000173726_TOMM20,ENSG00000173744_AGFG1,ENSG00000173757_STAT5B,ENSG00000173762_CD7,ENSG00000173786_CNP,ENSG00000173801_JUP,ENSG00000173812_EIF1,ENSG00000173818_ENDOV,ENSG00000173821_RNF213,ENSG00000173825_TIGD3,ENSG00000173846_PLK3,ENSG00000173848_NET1,ENSG00000173852_DPY19L1,ENSG00000173868_PHOSPHO1,ENSG00000173875_ZNF791,ENSG00000173889_PHC3,ENSG00000173890_GPR160,ENSG00000173905_GOLIM4,ENSG00000173914_RBM4B,ENSG00000173915_USMG5,ENSG00000173917_HOXB2,ENSG00000173926_MARCH3,ENSG00000173928_SWSAP1,ENSG00000173930_SLCO4C1,ENSG00000173933_RBM4,ENSG00000173950_XXYLT1,ENSG00000173960_UBXN2A,ENSG00000173988_LRRC63,ENSG00000173991_TCAP,ENSG00000173992_CCS,ENSG00000174004_NRROS,ENSG00000174007_CEP19,ENSG00000174010_KLHL15,ENSG00000174013_FBXO45,ENSG00000174021_GNG5,ENSG00000174032_SLC25A30,ENSG00000174080_CTSF,ENSG00000174099_MSRB3,ENSG00000174106_LEMD3,ENSG00000174109_C16orf91,ENSG00000174123_TLR10,ENSG00000174125_TLR1,ENSG00000174130_TLR6,ENSG00000174132_FAM174A,ENSG00000174136_RGMB,ENSG00000174151_CYB561D1,ENSG00000174165_ZDHHC24,ENSG00000174173_TRMT10C,ENSG00000174175_SELP,ENSG00000174177_CTU2,ENSG00000174197_MGA,ENSG00000174206_C12orf66,ENSG00000174227_PIGG,ENSG00000174231_PRPF8,ENSG00000174238_PITPNA,ENSG00000174243_DDX23,ENSG00000174276_ZNHIT2,ENSG00000174282_ZBTB4,ENSG00000174306_ZHX3,ENSG00000174327_SLC16A13,ENSG00000174371_EXO1,ENSG00000174373_RALGAPA1,ENSG00000174405_LIG4,ENSG00000174428_GTF2IRD2B,ENSG00000174437_ATP2A2,ENSG00000174442_ZWILCH,ENSG00000174444_RPL4,ENSG00000174446_SNAPC5,ENSG00000174456_C12orf76,ENSG00000174483_BBS1,ENSG00000174485_DENND4A,ENSG00000174500_GCSAM,ENSG00000174501_ANKRD36C,ENSG00000174516_PELI3,ENSG00000174529_TMEM81,ENSG00000174547_MRPL11,ENSG00000174564_IL20RB,ENSG00000174574_AKIRIN1,ENSG00000174579_MSL2,ENSG00000174600_CMKLR1,ENSG00000174606_ANGEL2,ENSG00000174607_UGT8,ENSG00000174652_ZNF266,ENSG00000174684_B4GAT1,ENSG00000174695_TMEM167A,ENSG00000174705_SH3PXD2B,ENSG00000174718_KIAA1551,ENSG00000174720_LARP7,ENSG00000174721_FGFBP3,ENSG00000174738_NR1D2,ENSG00000174744_BRMS1,ENSG00000174748_RPL15,ENSG00000174749_C4orf32,ENSG00000174775_HRAS,ENSG00000174776_WDR49,ENSG00000174780_SRP72,ENSG00000174788_PCP2,ENSG00000174791_RIN1,ENSG00000174796_THAP6,ENSG00000174799_CEP135,ENSG00000174837_ADGRE1,ENSG00000174839_DENND6A,ENSG00000174840_PDE12,ENSG00000174842_GLMN,ENSG00000174851_YIF1A,ENSG00000174885_NLRP6,ENSG00000174886_NDUFA11,ENSG00000174891_RSRC1,ENSG00000174903_RAB1B,ENSG00000174915_PTDSS2,ENSG00000174917_C19orf70,ENSG00000174943_KCTD13,ENSG00000174944_P2RY14,ENSG00000174946_GPR171,ENSG00000174953_DHX36,ENSG00000174989_FBXW8,ENSG00000174996_KLC2,ENSG00000175003_SLC22A1,ENSG00000175029_CTBP2,ENSG00000175040_CHST2,ENSG00000175048_ZDHHC14,ENSG00000175054_ATR,ENSG00000175063_UBE2C,ENSG00000175066_GK5,ENSG00000175073_VCPIP1,ENSG00000175087_PDIK1L,ENSG00000175104_TRAF6,ENSG00000175105_ZNF654,ENSG00000175106_TVP23C,ENSG00000175110_MRPS22,ENSG00000175115_PACS1,ENSG00000175130_MARCKSL1,ENSG00000175137_SH3BP5L,ENSG00000175155_YPEL2,ENSG00000175166_PSMD2,ENSG00000175182_FAM131A,ENSG00000175193_PARL,ENSG00000175197_DDIT3,ENSG00000175198_PCCA,ENSG00000175203_DCTN2,ENSG00000175213_ZNF408,ENSG00000175215_CTDSP2,ENSG00000175216_CKAP5,ENSG00000175220_ARHGAP1,ENSG00000175221_MED16,ENSG00000175224_ATG13,ENSG00000175265_GOLGA8A,ENSG00000175274_TP53I11,ENSG00000175283_DOLK,ENSG00000175294_CATSPER1,ENSG00000175305_CCNE2,ENSG00000175309_PHYKPL,ENSG00000175322_ZNF519,ENSG00000175324_LSM1,ENSG00000175334_BANF1,ENSG00000175348_TMEM9B,ENSG00000175352_NRIP3,ENSG00000175354_PTPN2,ENSG00000175356_SCUBE2,ENSG00000175376_EIF1AD,ENSG00000175387_SMAD2,ENSG00000175390_EIF3F,ENSG00000175395_ZNF25,ENSG00000175414_ARL10,ENSG00000175416_CLTB,ENSG00000175445_LPL,ENSG00000175449_RFESD,ENSG00000175455_CCDC14,ENSG00000175463_TBC1D10C,ENSG00000175467_SART1,ENSG00000175470_PPP2R2D,ENSG00000175471_MCTP1,ENSG00000175482_POLD4,ENSG00000175489_LRRC25,ENSG00000175536_LIPT2,ENSG00000175538_KCNE3,ENSG00000175548_ALG10B,ENSG00000175550_DRAP1,ENSG00000175556_LONRF3,ENSG00000175564_UCP3,ENSG00000175567_UCP2,ENSG00000175573_C11orf68,ENSG00000175575_PAAF1,ENSG00000175581_MRPL48,ENSG00000175582_RAB6A,ENSG00000175591_P2RY2,ENSG00000175595_ERCC4,ENSG00000175602_CCDC85B,ENSG00000175606_TMEM70,ENSG00000175634_RPS6KB2,ENSG00000175643_RMI2,ENSG00000175662_TOM1L2,ENSG00000175691_ZNF77,ENSG00000175701_LINC00116,ENSG00000175711_B3GNTL1,ENSG00000175727_MLXIP,ENSG00000175756_AURKAIP1,ENSG00000175764_TTLL11,ENSG00000175768_TOMM5,ENSG00000175782_SLC35E3,ENSG00000175787_ZNF169,ENSG00000175792_RUVBL1,ENSG00000175806_MSRA,ENSG00000175820_CCDC168,ENSG00000175826_CTDNEP1,ENSG00000175854_SWI5,ENSG00000175857_GAPT,ENSG00000175866_BAIAP2,ENSG00000175893_ZDHHC21,ENSG00000175895_PLEKHF2,ENSG00000175928_LRRN1,ENSG00000175931_UBE2O,ENSG00000175938_ORAI3,ENSG00000175970_UNC119B,ENSG00000175984_DENND2C,ENSG00000176014_TUBB6,ENSG00000176018_LYSMD3,ENSG00000176022_B3GALT6,ENSG00000176024_ZNF613,ENSG00000176049_JAKMIP2,ENSG00000176055_MBLAC2,ENSG00000176058_TPRN,ENSG00000176076_KCNE5,ENSG00000176087_SLC35A4,ENSG00000176092_AIM1L,ENSG00000176095_IP6K1,ENSG00000176101_SSNA1,ENSG00000176102_CSTF3,ENSG00000176105_YES1,ENSG00000176108_CHMP6,ENSG00000176124_DLEU1,ENSG00000176125_UFSP1,ENSG00000176142_TMEM39A,ENSG00000176148_TCP11L1,ENSG00000176155_CCDC57,ENSG00000176160_HSF5,ENSG00000176170_SPHK1,ENSG00000176171_BNIP3,ENSG00000176182_MYPOP,ENSG00000176208_ATAD5,ENSG00000176209_SMIM19,ENSG00000176222_ZNF404,ENSG00000176225_RTTN,ENSG00000176248_ANAPC2,ENSG00000176261_ZBTB8OS,ENSG00000176273_SLC35G1,ENSG00000176340_COX8A,ENSG00000176371_ZSCAN2,ENSG00000176386_CDC26,ENSG00000176390_CRLF3,ENSG00000176393_RNPEP,ENSG00000176396_EID2,ENSG00000176401_EID2B,ENSG00000176407_KCMF1,ENSG00000176410_DNAJC30,ENSG00000176422_SPRYD4,ENSG00000176438_SYNE3,ENSG00000176444_CLK2,ENSG00000176454_LPCAT4,ENSG00000176463_SLCO3A1,ENSG00000176473_WDR25,ENSG00000176476_SGF29,ENSG00000176485_PLA2G16,ENSG00000176531_PHLDB3,ENSG00000176533_GNG7,ENSG00000176542_USF3,ENSG00000176595_KBTBD11,ENSG00000176597_B3GNT5,ENSG00000176619_LMNB2,ENSG00000176623_RMDN1,ENSG00000176624_MEX3C,ENSG00000176641_RNF152,ENSG00000176658_MYO1D,ENSG00000176714_CCDC121,ENSG00000176715_ACSF3,ENSG00000176731_C8orf59,ENSG00000176749_CDK5R1,ENSG00000176783_RUFY1,ENSG00000176788_BASP1,ENSG00000176809_LRRC37A3,ENSG00000176834_VSIG10,ENSG00000176845_METRNL,ENSG00000176853_FAM91A1,ENSG00000176871_WSB2,ENSG00000176890_TYMS,ENSG00000176896_TCEANC,ENSG00000176903_PNMA1,ENSG00000176915_ANKLE2,ENSG00000176927_EFCAB5,ENSG00000176928_GCNT4,ENSG00000176946_THAP4,ENSG00000176953_NFATC2IP,ENSG00000176973_FAM89B,ENSG00000176974_SHMT1,ENSG00000176978_DPP7,ENSG00000176986_SEC24C,ENSG00000176994_SMCR8,ENSG00000177000_MTHFR,ENSG00000177030_DEAF1,ENSG00000177034_MTX3,ENSG00000177042_TMEM80,ENSG00000177051_FBXO46,ENSG00000177054_ZDHHC13,ENSG00000177058_SLC38A9,ENSG00000177076_ACER2,ENSG00000177082_WDR73,ENSG00000177084_POLE,ENSG00000177096_FAM109B,ENSG00000177105_RHOG,ENSG00000177106_EPS8L2,ENSG00000177119_ANO6,ENSG00000177125_ZBTB34,ENSG00000177150_FAM210A,ENSG00000177156_TALDO1,ENSG00000177169_ULK1,ENSG00000177189_RPS6KA3,ENSG00000177191_B3GNT8,ENSG00000177192_PUS1,ENSG00000177200_CHD9,ENSG00000177225_PDDC1,ENSG00000177239_MAN1B1,ENSG00000177272_KCNA3,ENSG00000177301_KCNA2,ENSG00000177302_TOP3A,ENSG00000177311_ZBTB38,ENSG00000177324_BEND2,ENSG00000177352_CCDC71,ENSG00000177370_TIMM22,ENSG00000177374_HIC1,ENSG00000177383_MAGEF1,ENSG00000177409_SAMD9L,ENSG00000177425_PAWR,ENSG00000177426_TGIF1,ENSG00000177427_MIEF2,ENSG00000177432_NAP1L5,ENSG00000177455_CD19,ENSG00000177463_NR2C2,ENSG00000177479_ARIH2,ENSG00000177483_RBM44,ENSG00000177485_ZBTB33,ENSG00000177542_SLC25A22,ENSG00000177548_RABEP2,ENSG00000177556_ATOX1,ENSG00000177565_TBL1XR1,ENSG00000177570_SAMD12,ENSG00000177575_CD163,ENSG00000177576_C18orf32,ENSG00000177595_PIDD1,ENSG00000177599_ZNF491,ENSG00000177600_RPLP2,ENSG00000177602_GSG2,ENSG00000177606_JUN,ENSG00000177613_CSTF2T,ENSG00000177628_GBA,ENSG00000177646_ACAD9,ENSG00000177663_IL17RA,ENSG00000177666_PNPLA2,ENSG00000177674_AGTRAP,ENSG00000177675_CD163L1,ENSG00000177683_THAP5,ENSG00000177685_CRACR2B,ENSG00000177688_SUMO4,ENSG00000177697_CD151,ENSG00000177700_POLR2L,ENSG00000177706_FAM20C,ENSG00000177707_NECTIN3,ENSG00000177721_ANXA2R,ENSG00000177728_TMEM94,ENSG00000177731_FLII,ENSG00000177733_HNRNPA0,ENSG00000177830_CHID1,ENSG00000177842_ZNF620,ENSG00000177853_ZNF518A,ENSG00000177854_TMEM187,ENSG00000177868_SVBP,ENSG00000177873_ZNF619,ENSG00000177879_AP3S1,ENSG00000177885_GRB2,ENSG00000177888_ZBTB41,ENSG00000177889_UBE2N,ENSG00000177917_ARL6IP6,ENSG00000177932_ZNF354C,ENSG00000177943_MAMDC4,ENSG00000177946_CENPBD1,ENSG00000177951_BET1L,ENSG00000177954_RPS27,ENSG00000177963_RIC8A,ENSG00000177971_IMP3,ENSG00000177981_ASB8,ENSG00000177989_ODF3B,ENSG00000178026_LRRC75B,ENSG00000178028_DMAP1,ENSG00000178033_FAM26E,ENSG00000178035_IMPDH2,ENSG00000178038_ALS2CL,ENSG00000178057_NDUFAF3,ENSG00000178074_C2orf69,ENSG00000178075_GRAMD1C,ENSG00000178093_TSSK6,ENSG00000178096_BOLA1,ENSG00000178104_PDE4DIP,ENSG00000178105_DDX10,ENSG00000178127_NDUFV2,ENSG00000178149_DALRD3,ENSG00000178163_ZNF518B,ENSG00000178175_ZNF366,ENSG00000178177_LCORL,ENSG00000178188_SH2B1,ENSG00000178199_ZC3H12D,ENSG00000178202_KDELC2,ENSG00000178209_PLEC,ENSG00000178226_PRSS36,ENSG00000178229_ZNF543,ENSG00000178234_GALNT11,ENSG00000178252_WDR6,ENSG00000178295_GEN1,ENSG00000178297_TMPRSS9,ENSG00000178307_TMEM11,ENSG00000178338_ZNF354B,ENSG00000178342_KCNG2,ENSG00000178381_ZFAND2A,ENSG00000178385_PLEKHM3,ENSG00000178397_FAM220A,ENSG00000178404_CEP295NL,ENSG00000178425_NT5DC1,ENSG00000178449_COX14,ENSG00000178467_P4HTM,ENSG00000178502_KLHL11,ENSG00000178537_SLC25A20,ENSG00000178538_CA8,ENSG00000178562_CD28,ENSG00000178567_EPM2AIP1,ENSG00000178573_MAF,ENSG00000178585_CTNNBIP1,ENSG00000178605_GTPBP6,ENSG00000178607_ERN1,ENSG00000178623_GPR35,ENSG00000178665_ZNF713,ENSG00000178685_PARP10,ENSG00000178691_SUZ12,ENSG00000178694_NSUN3,ENSG00000178695_KCTD12,ENSG00000178700_DHFR2,ENSG00000178719_GRINA,ENSG00000178726_THBD,ENSG00000178732_GP5,ENSG00000178741_COX5A,ENSG00000178761_FAM219B,ENSG00000178764_ZHX2,ENSG00000178789_CD300LB,ENSG00000178802_MPI,ENSG00000178814_OPLAH,ENSG00000178852_EFCAB13,ENSG00000178878_APOLD1,ENSG00000178896_EXOSC4,ENSG00000178904_DPY19L3,ENSG00000178913_TAF7,ENSG00000178917_ZNF852,ENSG00000178921_PFAS,ENSG00000178922_HYI,ENSG00000178927_C17orf62,ENSG00000178935_ZNF552,ENSG00000178950_GAK,ENSG00000178951_ZBTB7A,ENSG00000178952_TUFM,ENSG00000178966_RMI1,ENSG00000178971_CTC1,ENSG00000178974_FBXO34,ENSG00000178980_SELENOW,ENSG00000178982_EIF3K,ENSG00000178988_MRFAP1L1,ENSG00000178996_SNX18,ENSG00000178999_AURKB,ENSG00000179010_MRFAP1,ENSG00000179021_C3orf38,ENSG00000179029_TMEM107,ENSG00000179041_RRS1,ENSG00000179044_EXOC3L1,ENSG00000179051_RCC2,ENSG00000179085_DPM3,ENSG00000179088_C12orf42,ENSG00000179091_CYC1,ENSG00000179094_PER1,ENSG00000179104_TMTC2,ENSG00000179115_FARSA,ENSG00000179119_SPTY2D1,ENSG00000179134_SAMD4B,ENSG00000179144_GIMAP7,ENSG00000179151_EDC3,ENSG00000179152_TCAIM,ENSG00000179163_FUCA1,ENSG00000179195_ZNF664,ENSG00000179218_CALR,ENSG00000179222_MAGED1,ENSG00000179240_RP11-111M22.2,ENSG00000179241_LDLRAD3,ENSG00000179262_RAD23A,ENSG00000179271_GADD45GIP1,ENSG00000179295_PTPN11,ENSG00000179299_NSUN7,ENSG00000179331_RAB39A,ENSG00000179335_CLK3,ENSG00000179344_HLA-DQB1,ENSG00000179348_GATA2,ENSG00000179361_ARID3B,ENSG00000179364_PACS2,ENSG00000179387_ELMOD2,ENSG00000179397_C1orf101,ENSG00000179409_GEMIN4,ENSG00000179454_KLHL28,ENSG00000179456_ZBTB18,ENSG00000179476_C14orf28,ENSG00000179526_SHARPIN,ENSG00000179532_DNHD1,ENSG00000179542_SLITRK4,ENSG00000179562_GCC1,ENSG00000179583_CIITA,ENSG00000179588_ZFPM1,ENSG00000179598_PLD6,ENSG00000179604_CDC42EP4,ENSG00000179627_ZBTB42,ENSG00000179630_LACC1,ENSG00000179632_MAF1,ENSG00000179639_FCER1A,ENSG00000179698_WDR97,ENSG00000179715_PCED1B,ENSG00000179750_APOBEC3B,ENSG00000179761_PIPOX,ENSG00000179820_MYADM,ENSG00000179832_MROH1,ENSG00000179833_SERTAD2,ENSG00000179841_AKAP5,ENSG00000179859_AC025335.1,ENSG00000179862_CITED4,ENSG00000179869_ABCA13,ENSG00000179886_TIGD5,ENSG00000179889_PDXDC1,ENSG00000179909_ZNF154,ENSG00000179912_R3HDM2,ENSG00000179914_ITLN1,ENSG00000179915_NRXN1,ENSG00000179918_SEPHS2,ENSG00000179921_GPBAR1,ENSG00000179922_ZNF784,ENSG00000179933_C14orf119,ENSG00000179941_BBS10,ENSG00000179943_FIZ1,ENSG00000179950_PUF60,ENSG00000179958_DCTPP1,ENSG00000179979_CRIPAK,ENSG00000179981_TSHZ1,ENSG00000179988_PSTK,ENSG00000180008_SOCS4,ENSG00000180011_ZADH2,ENSG00000180035_ZNF48,ENSG00000180061_TMEM150B,ENSG00000180071_ANKRD18A,ENSG00000180089_TMEM86B,ENSG00000180096_SEPT1,ENSG00000180098_TRNAU1AP,ENSG00000180104_EXOC3,ENSG00000180182_MED14,ENSG00000180185_FAHD1,ENSG00000180190_TDRP,ENSG00000180198_RCC1,ENSG00000180228_PRKRA,ENSG00000180233_ZNRF2,ENSG00000180257_ZNF816,ENSG00000180263_FGD6,ENSG00000180304_OAZ2,ENSG00000180316_PNPLA1,ENSG00000180329_CCDC43,ENSG00000180340_FZD2,ENSG00000180346_TIGD2,ENSG00000180353_HCLS1,ENSG00000180354_MTURN,ENSG00000180357_ZNF609,ENSG00000180370_PAK2,ENSG00000180376_CCDC66,ENSG00000180398_MCFD2,ENSG00000180423_HARBI1,ENSG00000180425_C11orf71,ENSG00000180448_ARHGAP45,ENSG00000180479_ZNF571,ENSG00000180488_MIGA1,ENSG00000180509_KCNE1,ENSG00000180530_NRIP1,ENSG00000180537_RNF182,ENSG00000180543_TSPYL5,ENSG00000180549_FUT7,ENSG00000180573_HIST1H2AC,ENSG00000180574_EIF2S3L,ENSG00000180596_HIST1H2BC,ENSG00000180611_MB21D2,ENSG00000180626_ZNF594,ENSG00000180628_PCGF5,ENSG00000180644_PRF1,ENSG00000180667_YOD1,ENSG00000180694_TMEM64,ENSG00000180739_S1PR5,ENSG00000180758_GPR157,ENSG00000180767_CHST13,ENSG00000180773_SLC36A4,ENSG00000180776_ZDHHC20,ENSG00000180787_ZFP3,ENSG00000180817_PPA1,ENSG00000180822_PSMG4,ENSG00000180834_MAP6D1,ENSG00000180855_ZNF443,ENSG00000180871_CXCR2,ENSG00000180879_SSR4,ENSG00000180881_CAPS2,ENSG00000180884_ZNF792,ENSG00000180891_CUEDC1,ENSG00000180900_SCRIB,ENSG00000180901_KCTD2,ENSG00000180902_D2HGDH,ENSG00000180917_CMTR2,ENSG00000180921_FAM83H,ENSG00000180938_ZNF572,ENSG00000180953_ST20,ENSG00000180957_PITPNB,ENSG00000180964_TCEAL8,ENSG00000180979_LRRC57,ENSG00000180992_MRPL14,ENSG00000181004_BBS12,ENSG00000181007_ZFP82,ENSG00000181016_LSMEM1,ENSG00000181026_AEN,ENSG00000181027_FKRP,ENSG00000181029_TRAPPC5,ENSG00000181031_RPH3AL,ENSG00000181035_SLC25A42,ENSG00000181036_FCRL6,ENSG00000181038_METTL23,ENSG00000181045_SLC26A11,ENSG00000181061_HIGD1A,ENSG00000181090_EHMT1,ENSG00000181104_F2R,ENSG00000181135_ZNF707,ENSG00000181163_NPM1,ENSG00000181191_PJA1,ENSG00000181192_DHTKD1,ENSG00000181218_HIST3H2A,ENSG00000181220_ZNF746,ENSG00000181222_POLR2A,ENSG00000181274_FRAT2,ENSG00000181284_TMEM102,ENSG00000181315_ZNF322,ENSG00000181350_LRRC75A,ENSG00000181381_DDX60L,ENSG00000181396_OGFOD3,ENSG00000181404_WASH1,ENSG00000181409_AATK,ENSG00000181444_ZNF467,ENSG00000181450_ZNF678,ENSG00000181467_RAP2B,ENSG00000181472_ZBTB2,ENSG00000181481_RNF135,ENSG00000181513_ACBD4,ENSG00000181523_SGSH,ENSG00000181544_FANCB,ENSG00000181555_SETD2,ENSG00000181588_MEX3D,ENSG00000181610_MRPS23,ENSG00000181619_GPR135,ENSG00000181631_P2RY13,ENSG00000181634_TNFSF15,ENSG00000181638_ZFP41,ENSG00000181666_HKR1,ENSG00000181690_PLAG1,ENSG00000181704_YIPF6,ENSG00000181722_ZBTB20,ENSG00000181744_C3orf58,ENSG00000181751_C5orf30,ENSG00000181754_AMIGO1,ENSG00000181778_TMEM252,ENSG00000181788_SIAH2,ENSG00000181789_COPG1,ENSG00000181804_SLC9A9,ENSG00000181817_LSM10,ENSG00000181826_RELL1,ENSG00000181827_RFX7,ENSG00000181830_SLC35C1,ENSG00000181847_TIGIT,ENSG00000181852_RNF41,ENSG00000181873_IBA57,ENSG00000181894_ZNF329,ENSG00000181896_ZNF101,ENSG00000181904_C5orf24,ENSG00000181915_ADO,ENSG00000181924_COA4,ENSG00000181929_PRKAG1,ENSG00000181938_GINS3,ENSG00000181963_OR52K2,ENSG00000181982_CCDC149,ENSG00000181991_MRPS11,ENSG00000182004_SNRPE,ENSG00000182010_RTKN2,ENSG00000182022_CHST15,ENSG00000182054_IDH2,ENSG00000182087_TMEM259,ENSG00000182093_WRB,ENSG00000182095_TNRC18,ENSG00000182108_DEXI,ENSG00000182117_NOP10,ENSG00000182118_FAM89A,ENSG00000182134_TDRKH,ENSG00000182141_ZNF708,ENSG00000182149_IST1,ENSG00000182150_ERCC6L2,ENSG00000182154_MRPL41,ENSG00000182158_CREB3L2,ENSG00000182162_P2RY8,ENSG00000182173_TSEN54,ENSG00000182179_UBA7,ENSG00000182180_MRPS16,ENSG00000182183_FAM159A,ENSG00000182185_RAD51B,ENSG00000182196_ARL6IP4,ENSG00000182197_EXT1,ENSG00000182199_SHMT2,ENSG00000182208_MOB2,ENSG00000182220_ATP6AP2,ENSG00000182240_BACE2,ENSG00000182247_UBE2E2,ENSG00000182253_SYNM,ENSG00000182287_AP1S2,ENSG00000182307_C8orf33,ENSG00000182308_DCAF4L1,ENSG00000182310_SPACA6,ENSG00000182318_ZSCAN22,ENSG00000182325_FBXL6,ENSG00000182359_KBTBD3,ENSG00000182362_YBEY,ENSG00000182372_CLN8,ENSG00000182378_PLCXD1,ENSG00000182389_CACNB4,ENSG00000182400_TRAPPC6B,ENSG00000182405_PGBD4,ENSG00000182446_NPLOC4,ENSG00000182463_TSHZ2,ENSG00000182472_CAPN12,ENSG00000182473_EXOC7,ENSG00000182481_KPNA2,ENSG00000182489_XKRX,ENSG00000182504_CEP97,ENSG00000182511_FES,ENSG00000182512_GLRX5,ENSG00000182518_FAM104B,ENSG00000182534_MXRA7,ENSG00000182541_LIMK2,ENSG00000182544_MFSD5,ENSG00000182551_ADI1,ENSG00000182552_RWDD4,ENSG00000182557_SPNS3,ENSG00000182568_SATB1,ENSG00000182578_CSF1R,ENSG00000182584_ACTL10,ENSG00000182600_C2orf82,ENSG00000182606_TRAK1,ENSG00000182621_PLCB1,ENSG00000182628_SKA2,ENSG00000182670_TTC3,ENSG00000182685_BRICD5,ENSG00000182700_IGIP,ENSG00000182718_ANXA2,ENSG00000182732_RGS6,ENSG00000182742_HOXB4,ENSG00000182749_PAQR7,ENSG00000182768_NGRN,ENSG00000182774_RPS17,ENSG00000182782_HCAR2,ENSG00000182795_C1orf116,ENSG00000182809_CRIP2,ENSG00000182810_DDX28,ENSG00000182827_ACBD3,ENSG00000182831_C16orf72,ENSG00000182858_ALG12,ENSG00000182866_LCK,ENSG00000182871_COL18A1,ENSG00000182872_RBM10,ENSG00000182885_ADGRG3,ENSG00000182890_GLUD2,ENSG00000182899_RPL35A,ENSG00000182903_ZNF721,ENSG00000182919_C11orf54,ENSG00000182923_CEP63,ENSG00000182934_SRPRA,ENSG00000182944_EWSR1,ENSG00000182952_HMGN4,ENSG00000182957_SPATA13,ENSG00000182973_CNOT10,ENSG00000182979_MTA1,ENSG00000182985_CADM1,ENSG00000182986_ZNF320,ENSG00000183011_NAA38,ENSG00000183018_SPNS2,ENSG00000183019_MCEMP1,ENSG00000183020_AP2A2,ENSG00000183023_SLC8A1,ENSG00000183044_ABAT,ENSG00000183049_CAMK1D,ENSG00000183060_LYSMD4,ENSG00000183066_WBP2NL,ENSG00000183077_AFMID,ENSG00000183087_GAS6,ENSG00000183091_NEB,ENSG00000183092_BEGAIN,ENSG00000183111_ARHGEF37,ENSG00000183134_PTGDR2,ENSG00000183137_CEP57L1,ENSG00000183155_RABIF,ENSG00000183160_TMEM119,ENSG00000183161_FANCF,ENSG00000183172_SMDT1,ENSG00000183207_RUVBL2,ENSG00000183208_GDPGP1,ENSG00000183255_PTTG1IP,ENSG00000183258_DDX41,ENSG00000183283_DAZAP2,ENSG00000183291_SELENOF,ENSG00000183307_CECR6,ENSG00000183309_ZNF623,ENSG00000183323_CCDC125,ENSG00000183337_BCOR,ENSG00000183340_JRKL,ENSG00000183347_GBP6,ENSG00000183354_KIAA2026,ENSG00000183386_FHL3,ENSG00000183401_CCDC159,ENSG00000183431_SF3A3,ENSG00000183474_GTF2H2C,ENSG00000183475_ASB7,ENSG00000183484_GPR132,ENSG00000183486_MX2,ENSG00000183495_EP400,ENSG00000183508_FAM46C,ENSG00000183513_COA5,ENSG00000183520_UTP11,ENSG00000183527_PSMG1,ENSG00000183530_PRR14L,ENSG00000183570_PCBP3,ENSG00000183576_SETD3,ENSG00000183578_TNFAIP8L3,ENSG00000183597_TANGO2,ENSG00000183598_HIST2H3D,ENSG00000183605_SFXN4,ENSG00000183617_MRPL54,ENSG00000183621_ZNF438,ENSG00000183624_HMCES,ENSG00000183625_CCR3,ENSG00000183647_ZNF530,ENSG00000183648_NDUFB1,ENSG00000183655_KLHL25,ENSG00000183665_TRMT12,ENSG00000183684_ALYREF,ENSG00000183688_RFLNB,ENSG00000183690_EFHC2,ENSG00000183696_UPP1,ENSG00000183718_TRIM52,ENSG00000183722_LHFP,ENSG00000183723_CMTM4,ENSG00000183726_TMEM50A,ENSG00000183734_ASCL2,ENSG00000183735_TBK1,ENSG00000183741_CBX6,ENSG00000183742_MACC1,ENSG00000183751_TBL3,ENSG00000183762_KREMEN1,ENSG00000183765_CHEK2,ENSG00000183773_AIFM3,ENSG00000183784_C9orf66,ENSG00000183808_RBM12B,ENSG00000183813_CCR4,ENSG00000183814_LIN9,ENSG00000183826_BTBD9,ENSG00000183828_NUDT14,ENSG00000183837_PNMA3,ENSG00000183856_IQGAP3,ENSG00000183864_TOB2,ENSG00000183878_UTY,ENSG00000183891_TTC32,ENSG00000183918_SH2D1A,ENSG00000183943_PRKX,ENSG00000183955_KMT5A,ENSG00000183960_KCNH8,ENSG00000183963_SMTN,ENSG00000183978_COA3,ENSG00000184005_ST6GALNAC3,ENSG00000184007_PTP4A2,ENSG00000184009_ACTG1,ENSG00000184014_DENND5A,ENSG00000184047_DIABLO,ENSG00000184056_VPS33B,ENSG00000184060_ADAP2,ENSG00000184076_UQCR10,ENSG00000184083_FAM120C,ENSG00000184113_CLDN5,ENSG00000184117_NIPSNAP1,ENSG00000184154_LRTOMT,ENSG00000184162_NR2C2AP,ENSG00000184164_CRELD2,ENSG00000184178_SCFD2,ENSG00000184182_UBE2F,ENSG00000184203_PPP1R2,ENSG00000184205_TSPYL2,ENSG00000184207_PGP,ENSG00000184208_C22orf46,ENSG00000184209_SNRNP35,ENSG00000184216_IRAK1,ENSG00000184220_CMSS1,ENSG00000184221_OLIG1,ENSG00000184226_PCDH9,ENSG00000184232_OAF,ENSG00000184260_HIST2H2AC,ENSG00000184270_HIST2H2AB,ENSG00000184271_POU6F1,ENSG00000184277_TM2D3,ENSG00000184281_TSSC4,ENSG00000184292_TACSTD2,ENSG00000184293_CLECL1,ENSG00000184305_CCSER1,ENSG00000184307_ZDHHC23,ENSG00000184357_HIST1H1B,ENSG00000184371_CSF1,ENSG00000184381_PLA2G6,ENSG00000184384_MAML2,ENSG00000184402_SS18L1,ENSG00000184428_TOP1MT,ENSG00000184432_COPB2,ENSG00000184436_THAP7,ENSG00000184445_KNTC1,ENSG00000184465_WDR27,ENSG00000184470_TXNRD2,ENSG00000184481_FOXO4,ENSG00000184489_PTP4A3,ENSG00000184497_TMEM255B,ENSG00000184500_PROS1,ENSG00000184508_HDDC3,ENSG00000184517_ZFP1,ENSG00000184557_SOCS3,ENSG00000184574_LPAR5,ENSG00000184575_XPOT,ENSG00000184584_TMEM173,ENSG00000184588_PDE4B,ENSG00000184602_SNN,ENSG00000184613_NELL2,ENSG00000184619_KRBA2,ENSG00000184634_MED12,ENSG00000184635_ZNF93,ENSG00000184640_SEPT9,ENSG00000184661_CDCA2,ENSG00000184675_AMER1,ENSG00000184677_ZBTB40,ENSG00000184678_HIST2H2BE,ENSG00000184702_SEPT5,ENSG00000184708_EIF4ENIF1,ENSG00000184719_RNLS,ENSG00000184730_APOBR,ENSG00000184743_ATL3,ENSG00000184752_NDUFA12,ENSG00000184786_TCTE3,ENSG00000184787_UBE2G2,ENSG00000184792_OSBP2,ENSG00000184831_APOO,ENSG00000184840_TMED9,ENSG00000184857_TMEM186,ENSG00000184860_SDR42E1,ENSG00000184863_RBM33,ENSG00000184867_ARMCX2,ENSG00000184887_BTBD6,ENSG00000184897_H1FX,ENSG00000184898_RBM43,ENSG00000184900_SUMO3,ENSG00000184903_IMMP2L,ENSG00000184922_FMNL1,ENSG00000184924_PTRHD1,ENSG00000184939_ZFP90,ENSG00000184967_NOC4L,ENSG00000184979_USP18,ENSG00000184983_NDUFA6,ENSG00000184985_SORCS2,ENSG00000184988_TMEM106A,ENSG00000184990_SIVA1,ENSG00000184992_BRI3BP,ENSG00000185000_DGAT1,ENSG00000185009_AP3M1,ENSG00000185010_F8,ENSG00000185015_CA13,ENSG00000185019_UBOX5,ENSG00000185022_MAFF,ENSG00000185024_BRF1,ENSG00000185033_SEMA4B,ENSG00000185043_CIB1,ENSG00000185049_NELFA,ENSG00000185052_SLC24A3,ENSG00000185056_C5orf47,ENSG00000185085_INTS5,ENSG00000185088_RPS27L,ENSG00000185101_ANO9,ENSG00000185104_FAF1,ENSG00000185112_FAM43A,ENSG00000185115_NSMCE3,ENSG00000185122_HSF1,ENSG00000185127_C6orf120,ENSG00000185129_PURA,ENSG00000185130_HIST1H2BL,ENSG00000185158_LRRC37B,ENSG00000185163_DDX51,ENSG00000185164_NOMO2,ENSG00000185187_SIGIRR,ENSG00000185189_NRBP2,ENSG00000185201_IFITM2,ENSG00000185215_TNFAIP2,ENSG00000185219_ZNF445,ENSG00000185220_PGBD2,ENSG00000185236_RAB11B,ENSG00000185238_PRMT3,ENSG00000185246_PRPF39,ENSG00000185252_ZNF74,ENSG00000185261_KIAA0825,ENSG00000185262_UBALD2,ENSG00000185272_RBM11,ENSG00000185278_ZBTB37,ENSG00000185291_IL3RA,ENSG00000185298_CCDC137,ENSG00000185305_ARL15,ENSG00000185324_CDK10,ENSG00000185338_SOCS1,ENSG00000185339_TCN2,ENSG00000185340_GAS2L1,ENSG00000185344_ATP6V0A2,ENSG00000185347_C14orf80,ENSG00000185359_HGS,ENSG00000185361_TNFAIP8L1,ENSG00000185379_RAD51D,ENSG00000185386_MAPK11,ENSG00000185404_SP140L,ENSG00000185414_MRPL30,ENSG00000185418_TARSL2,ENSG00000185420_SMYD3,ENSG00000185432_METTL7A,ENSG00000185436_IFNLR1,ENSG00000185442_FAM174B,ENSG00000185453_C19orf68,ENSG00000185475_TMEM179B,ENSG00000185477_GPRIN3,ENSG00000185480_PARPBP,ENSG00000185482_STAC3,ENSG00000185504_FAAP100,ENSG00000185507_IRF7,ENSG00000185513_L3MBTL1,ENSG00000185515_BRCC3,ENSG00000185522_LMNTD2,ENSG00000185532_PRKG1,ENSG00000185561_TLCD2,ENSG00000185591_SP1,ENSG00000185608_MRPL40,ENSG00000185614_FAM212A,ENSG00000185619_PCGF3,ENSG00000185621_LMLN,ENSG00000185624_P4HB,ENSG00000185627_PSMD13,ENSG00000185630_PBX1,ENSG00000185650_ZFP36L1,ENSG00000185651_UBE2L3,ENSG00000185658_BRWD1,ENSG00000185669_SNAI3,ENSG00000185670_ZBTB3,ENSG00000185684_EP400NL,ENSG00000185697_MYBL1,ENSG00000185716_C16orf52,ENSG00000185721_DRG1,ENSG00000185722_ANKFY1,ENSG00000185728_YTHDF3,ENSG00000185730_ZNF696,ENSG00000185745_IFIT1,ENSG00000185753_CXorf38,ENSG00000185760_KCNQ5,ENSG00000185787_MORF4L1,ENSG00000185798_WDR53,ENSG00000185800_DMWD,ENSG00000185803_SLC52A2,ENSG00000185808_PIGP,ENSG00000185811_IKZF1,ENSG00000185813_PCYT2,ENSG00000185825_BCAP31,ENSG00000185838_GNB1L,ENSG00000185842_DNAH14,ENSG00000185862_EVI2B,ENSG00000185864_NPIPB4,ENSG00000185869_ZNF829,ENSG00000185875_THNSL1,ENSG00000185880_TRIM69,ENSG00000185885_IFITM1,ENSG00000185896_LAMP1,ENSG00000185897_FFAR3,ENSG00000185900_POMK,ENSG00000185905_C16orf54,ENSG00000185909_KLHDC8B,ENSG00000185917_SETD4,ENSG00000185920_PTCH1,ENSG00000185946_RNPC3,ENSG00000185947_ZNF267,ENSG00000185950_IRS2,ENSG00000185963_BICD2,ENSG00000185972_CCIN,ENSG00000185973_TMLHE,ENSG00000185989_RASA3,ENSG00000186001_LRCH3,ENSG00000186010_NDUFA13,ENSG00000186017_ZNF566,ENSG00000186020_ZNF529,ENSG00000186026_ZNF284,ENSG00000186047_DLEU7,ENSG00000186049_KRT73,ENSG00000186063_AIDA,ENSG00000186073_C15orf41,ENSG00000186074_CD300LF,ENSG00000186088_GSAP,ENSG00000186104_CYP2R1,ENSG00000186105_LRRC70,ENSG00000186106_ANKRD46,ENSG00000186111_PIP5K1C,ENSG00000186130_ZBTB6,ENSG00000186132_C2orf76,ENSG00000186141_POLR3C,ENSG00000186153_WWOX,ENSG00000186166_CCDC84,ENSG00000186174_BCL9L,ENSG00000186184_POLR1D,ENSG00000186187_ZNRF1,ENSG00000186193_SAPCD2,ENSG00000186204_CYP4F12,ENSG00000186205_MARC1,ENSG00000186222_BLOC1S4,ENSG00000186230_ZNF749,ENSG00000186260_MKL2,ENSG00000186265_BTLA,ENSG00000186272_ZNF17,ENSG00000186283_TOR3A,ENSG00000186298_PPP1CC,ENSG00000186300_ZNF555,ENSG00000186310_NAP1L3,ENSG00000186314_PRELID2,ENSG00000186318_BACE1,ENSG00000186350_RXRA,ENSG00000186352_ANKRD37,ENSG00000186354_C9orf47,ENSG00000186364_NUDT17,ENSG00000186376_ZNF75D,ENSG00000186395_KRT10,ENSG00000186407_CD300E,ENSG00000186409_CCDC30,ENSG00000186416_NKRF,ENSG00000186417_GLDN,ENSG00000186431_FCAR,ENSG00000186432_KPNA4,ENSG00000186446_ZNF501,ENSG00000186448_ZNF197,ENSG00000186453_FAM228A,ENSG00000186462_NAP1L2,ENSG00000186468_RPS23,ENSG00000186469_GNG2,ENSG00000186470_BTN3A2,ENSG00000186480_INSIG1,ENSG00000186496_ZNF396,ENSG00000186501_TMEM222,ENSG00000186517_ARHGAP30,ENSG00000186522_SEPT10,ENSG00000186529_CYP4F3,ENSG00000186532_SMYD4,ENSG00000186566_GPATCH8,ENSG00000186575_NF2,ENSG00000186577_C6orf1,ENSG00000186583_SPATC1,ENSG00000186591_UBE2H,ENSG00000186625_KATNA1,ENSG00000186635_ARAP1,ENSG00000186638_KIF24,ENSG00000186642_PDE2A,ENSG00000186654_PRR5,ENSG00000186660_ZFP91,ENSG00000186665_C17orf58,ENSG00000186666_BCDIN3D,ENSG00000186687_LYRM7,ENSG00000186714_CCDC73,ENSG00000186716_BCR,ENSG00000186767_SPIN4,ENSG00000186792_HYAL3,ENSG00000186806_VSIG10L,ENSG00000186812_ZNF397,ENSG00000186814_ZSCAN30,ENSG00000186815_TPCN1,ENSG00000186818_LILRB4,ENSG00000186827_TNFRSF4,ENSG00000186834_HEXIM1,ENSG00000186854_TRABD2A,ENSG00000186866_POFUT2,ENSG00000186871_ERCC6L,ENSG00000186891_TNFRSF18,ENSG00000186908_ZDHHC17,ENSG00000186918_ZNF395,ENSG00000186951_PPARA,ENSG00000186998_EMID1,ENSG00000187010_RHD,ENSG00000187017_ESPN,ENSG00000187024_PTRH1,ENSG00000187037_GPR141,ENSG00000187049_TMEM216,ENSG00000187051_RPS19BP1,ENSG00000187091_PLCD1,ENSG00000187097_ENTPD5,ENSG00000187098_MITF,ENSG00000187109_NAP1L1,ENSG00000187116_LILRA5,ENSG00000187118_CMC1,ENSG00000187122_SLIT1,ENSG00000187134_AKR1C1,ENSG00000187147_RNF220,ENSG00000187164_SHTN1,ENSG00000187187_ZNF546,ENSG00000187189_TSPYL4,ENSG00000187193_MT1X,ENSG00000187210_GCNT1,ENSG00000187231_SESTD1,ENSG00000187239_FNBP1,ENSG00000187240_DYNC2H1,ENSG00000187257_RSBN1L,ENSG00000187266_EPOR,ENSG00000187325_TAF9B,ENSG00000187446_CHP1,ENSG00000187475_HIST1H1T,ENSG00000187514_PTMA,ENSG00000187522_HSPA14,ENSG00000187531_SIRT7,ENSG00000187535_IFT140,ENSG00000187553_CYP26C1,ENSG00000187554_TLR5,ENSG00000187555_USP7,ENSG00000187601_MAGEH1,ENSG00000187605_TET3,ENSG00000187607_ZNF286A,ENSG00000187608_ISG15,ENSG00000187609_EXD3,ENSG00000187626_ZKSCAN4,ENSG00000187630_DHRS4L2,ENSG00000187650_VMAC,ENSG00000187676_B3GLCT,ENSG00000187688_TRPV2,ENSG00000187695_RP11-723O4.6,ENSG00000187699_C2orf88,ENSG00000187713_TMEM203,ENSG00000187735_TCEA1,ENSG00000187741_FANCA,ENSG00000187742_SECISBP2,ENSG00000187764_SEMA4D,ENSG00000187778_MCRS1,ENSG00000187790_FANCM,ENSG00000187792_ZNF70,ENSG00000187796_CARD9,ENSG00000187800_PEAR1,ENSG00000187801_ZFP69B,ENSG00000187808_SOWAHD,ENSG00000187815_ZFP69,ENSG00000187837_HIST1H1C,ENSG00000187840_EIF4EBP1,ENSG00000187860_CCDC157,ENSG00000187866_FAM122A,ENSG00000187912_CLEC17A,ENSG00000187951_ARHGAP11B,ENSG00000187954_CYHR1,ENSG00000187961_KLHL17,ENSG00000187994_RINL,ENSG00000188001_TPRG1,ENSG00000188021_UBQLN2,ENSG00000188026_RILPL1,ENSG00000188033_ZNF490,ENSG00000188042_ARL4C,ENSG00000188056_TREML4,ENSG00000188070_C11orf95,ENSG00000188092_GPR89B,ENSG00000188107_EYS,ENSG00000188157_AGRN,ENSG00000188158_NHS,ENSG00000188167_TMPPE,ENSG00000188171_ZNF626,ENSG00000188175_HEPACAM2,ENSG00000188177_ZC3H6,ENSG00000188186_LAMTOR4,ENSG00000188191_PRKAR1B,ENSG00000188211_NCR3LG1,ENSG00000188215_DCUN1D3,ENSG00000188227_ZNF793,ENSG00000188229_TUBB4B,ENSG00000188243_COMMD6,ENSG00000188282_RUFY4,ENSG00000188283_ZNF383,ENSG00000188290_HES4,ENSG00000188295_ZNF669,ENSG00000188305_C19orf35,ENSG00000188312_CENPP,ENSG00000188313_PLSCR1,ENSG00000188315_C3orf62,ENSG00000188321_ZNF559,ENSG00000188342_GTF2F2,ENSG00000188352_FOCAD,ENSG00000188375_H3F3C,ENSG00000188404_SELL,ENSG00000188419_CHM,ENSG00000188428_BLOC1S5,ENSG00000188483_IER5L,ENSG00000188486_H2AFX,ENSG00000188487_INSC,ENSG00000188493_C19orf54,ENSG00000188522_FAM83G,ENSG00000188529_SRSF10,ENSG00000188536_HBA2,ENSG00000188542_DUSP28,ENSG00000188549_C15orf52,ENSG00000188554_NBR1,ENSG00000188559_RALGAPA2,ENSG00000188566_NDOR1,ENSG00000188596_CFAP54,ENSG00000188603_CLN3,ENSG00000188612_SUMO2,ENSG00000188636_LDOC1L,ENSG00000188641_DPYD,ENSG00000188647_PTAR1,ENSG00000188649_CC2D2B,ENSG00000188672_RHCE,ENSG00000188677_PARVB,ENSG00000188687_SLC4A5,ENSG00000188690_UROS,ENSG00000188706_ZDHHC9,ENSG00000188707_ZBED6CL,ENSG00000188725_SMIM15,ENSG00000188732_FAM221A,ENSG00000188735_TMEM120B,ENSG00000188739_RBM34,ENSG00000188747_NOXA1,ENSG00000188761_BCL2L15,ENSG00000188785_ZNF548,ENSG00000188786_MTF1,ENSG00000188811_NHLRC3,ENSG00000188820_FAM26F,ENSG00000188822_CNR2,ENSG00000188827_SLX4,ENSG00000188846_RPL14,ENSG00000188848_BEND4,ENSG00000188868_ZNF563,ENSG00000188878_FBF1,ENSG00000188895_MSL1,ENSG00000188897_CTD-3088G3.8,ENSG00000188906_LRRK2,ENSG00000188917_TRMT2B,ENSG00000188921_HACD4,ENSG00000188938_FAM120AOS,ENSG00000188976_NOC2L,ENSG00000188981_MSANTD1,ENSG00000188986_NELFB,ENSG00000188994_ZNF292,ENSG00000188997_KCTD21,ENSG00000189007_ADAT2,ENSG00000189042_ZNF567,ENSG00000189043_NDUFA4,ENSG00000189045_ANKDD1B,ENSG00000189046_ALKBH2,ENSG00000189050_RNFT1,ENSG00000189057_FAM111B,ENSG00000189060_H1F0,ENSG00000189067_LITAF,ENSG00000189068_VSTM1,ENSG00000189077_TMEM120A,ENSG00000189079_ARID2,ENSG00000189091_SF3B3,ENSG00000189114_BLOC1S3,ENSG00000189127_ANKRD34B,ENSG00000189134_NKAPL,ENSG00000189144_ZNF573,ENSG00000189159_HN1,ENSG00000189164_ZNF527,ENSG00000189180_ZNF33A,ENSG00000189190_ZNF600,ENSG00000189195_BTBD8,ENSG00000189221_MAOA,ENSG00000189227_C15orf61,ENSG00000189233_NUGGC,ENSG00000189241_TSPYL1,ENSG00000189266_PNRC2,ENSG00000189269_DRICH1,ENSG00000189283_FHIT,ENSG00000189298_ZKSCAN3,ENSG00000189306_RRP7A,ENSG00000189308_LIN54,ENSG00000189319_FAM53B,ENSG00000189337_KAZN,ENSG00000189339_SLC35E2B,ENSG00000189350_FAM179A,ENSG00000189362_NEMP2,ENSG00000189369_GSPT2,ENSG00000189376_C8orf76,ENSG00000189403_HMGB1,ENSG00000189420_ZFP92,ENSG00000189430_NCR1,ENSG00000196072_BLOC1S2,ENSG00000196074_SYCP2,ENSG00000196083_IL1RAP,ENSG00000196092_PAX5,ENSG00000196110_ZNF699,ENSG00000196116_TDRD7,ENSG00000196118_CCDC189,ENSG00000196123_KIAA0895L,ENSG00000196126_HLA-DRB1,ENSG00000196139_AKR1C3,ENSG00000196141_SPATS2L,ENSG00000196150_ZNF250,ENSG00000196151_WDSUB1,ENSG00000196152_ZNF79,ENSG00000196154_S100A4,ENSG00000196155_PLEKHG4,ENSG00000196159_FAT4,ENSG00000196172_ZNF681,ENSG00000196177_ACADSB,ENSG00000196182_STK40,ENSG00000196187_TMEM63A,ENSG00000196188_CTSE,ENSG00000196189_SEMA4A,ENSG00000196199_MPHOSPH8,ENSG00000196209_SIRPB2,ENSG00000196214_ZNF766,ENSG00000196218_RYR1,ENSG00000196220_SRGAP3,ENSG00000196227_FAM217B,ENSG00000196230_TUBB,ENSG00000196233_LCOR,ENSG00000196235_SUPT5H,ENSG00000196236_XPNPEP3,ENSG00000196247_ZNF107,ENSG00000196262_PPIA,ENSG00000196263_ZNF471,ENSG00000196267_ZNF836,ENSG00000196268_ZNF493,ENSG00000196284_SUPT3H,ENSG00000196290_NIF3L1,ENSG00000196305_IARS,ENSG00000196312_MFSD14C,ENSG00000196313_POM121,ENSG00000196323_ZBTB44,ENSG00000196329_GIMAP5,ENSG00000196338_NLGN3,ENSG00000196345_ZKSCAN7,ENSG00000196352_CD55,ENSG00000196357_ZNF565,ENSG00000196358_NTNG2,ENSG00000196363_WDR5,ENSG00000196365_LONP1,ENSG00000196367_TRRAP,ENSG00000196369_SRGAP2B,ENSG00000196371_FUT4,ENSG00000196372_ASB13,ENSG00000196378_ZNF34,ENSG00000196381_ZNF781,ENSG00000196387_ZNF140,ENSG00000196396_PTPN1,ENSG00000196405_EVL,ENSG00000196411_EPHB4,ENSG00000196417_ZNF765,ENSG00000196418_ZNF124,ENSG00000196419_XRCC6,ENSG00000196421_LINC00176,ENSG00000196422_PPP1R26,ENSG00000196428_TSC22D2,ENSG00000196437_ZNF569,ENSG00000196440_ARMCX4,ENSG00000196449_YRDC,ENSG00000196453_ZNF777,ENSG00000196455_PIK3R4,ENSG00000196456_ZNF775,ENSG00000196458_ZNF605,ENSG00000196459_TRAPPC2,ENSG00000196465_MYL6B,ENSG00000196466_ZNF799,ENSG00000196470_SIAH1,ENSG00000196498_NCOR2,ENSG00000196502_SULT1A1,ENSG00000196504_PRPF40A,ENSG00000196505_GDAP2,ENSG00000196507_TCEAL3,ENSG00000196510_ANAPC7,ENSG00000196511_TPK1,ENSG00000196517_SLC6A9,ENSG00000196526_AFAP1,ENSG00000196531_NACA,ENSG00000196535_MYO18A,ENSG00000196544_BORCS6,ENSG00000196547_MAN2A2,ENSG00000196549_MME,ENSG00000196562_SULF2,ENSG00000196565_HBG2,ENSG00000196569_LAMA2,ENSG00000196576_PLXNB2,ENSG00000196584_XRCC2,ENSG00000196586_MYO6,ENSG00000196588_MKL1,ENSG00000196591_HDAC2,ENSG00000196597_ZNF782,ENSG00000196605_ZNF846,ENSG00000196628_TCF4,ENSG00000196636_SDHAF3,ENSG00000196642_RABL6,ENSG00000196646_ZNF136,ENSG00000196652_ZKSCAN5,ENSG00000196653_ZNF502,ENSG00000196655_TRAPPC4,ENSG00000196659_TTC30B,ENSG00000196663_TECPR2,ENSG00000196664_TLR7,ENSG00000196670_ZFP62,ENSG00000196678_ERI2,ENSG00000196683_TOMM7,ENSG00000196684_HSH2D,ENSG00000196689_TRPV1,ENSG00000196693_ZNF33B,ENSG00000196700_ZNF512B,ENSG00000196704_AMZ2,ENSG00000196705_ZNF431,ENSG00000196712_NF1,ENSG00000196715_VKORC1L1,ENSG00000196724_ZNF418,ENSG00000196730_DAPK1,ENSG00000196735_HLA-DQA1,ENSG00000196743_GM2A,ENSG00000196747_HIST1H2AI,ENSG00000196757_ZNF700,ENSG00000196776_CD47,ENSG00000196778_OR52K1,ENSG00000196781_TLE1,ENSG00000196782_MAML3,ENSG00000196787_HIST1H2AG,ENSG00000196792_STRN3,ENSG00000196793_ZNF239,ENSG00000196812_ZSCAN16,ENSG00000196814_MVB12B,ENSG00000196821_C6orf106,ENSG00000196839_ADA,ENSG00000196843_ARID5A,ENSG00000196850_PPTC7,ENSG00000196865_NHLRC2,ENSG00000196866_HIST1H2AD,ENSG00000196867_ZFP28,ENSG00000196872_KIAA1211L,ENSG00000196873_CBWD3,ENSG00000196876_SCN8A,ENSG00000196878_LAMB3,ENSG00000196890_HIST3H2BB,ENSG00000196911_KPNA5,ENSG00000196912_ANKRD36B,ENSG00000196914_ARHGEF12,ENSG00000196923_PDLIM7,ENSG00000196924_FLNA,ENSG00000196935_SRGAP1,ENSG00000196937_FAM3C,ENSG00000196943_NOP9,ENSG00000196950_SLC39A10,ENSG00000196954_CASP4,ENSG00000196961_AP2A1,ENSG00000196967_ZNF585A,ENSG00000196968_FUT11,ENSG00000196975_ANXA4,ENSG00000196976_LAGE3,ENSG00000196981_WDR5B,ENSG00000196998_WDR45,ENSG00000197006_METTL9,ENSG00000197008_ZNF138,ENSG00000197013_ZNF429,ENSG00000197016_ZNF470,ENSG00000197019_SERTAD1,ENSG00000197020_ZNF100,ENSG00000197021_CXorf40B,ENSG00000197024_ZNF398,ENSG00000197037_ZSCAN25,ENSG00000197043_ANXA6,ENSG00000197044_ZNF441,ENSG00000197045_GMFB,ENSG00000197046_SIGLEC15,ENSG00000197050_ZNF420,ENSG00000197054_ZNF763,ENSG00000197056_ZMYM1,ENSG00000197057_DTHD1,ENSG00000197061_HIST1H4C,ENSG00000197062_ZSCAN26,ENSG00000197063_MAFG,ENSG00000197070_ARRDC1,ENSG00000197081_IGF2R,ENSG00000197102_DYNC1H1,ENSG00000197111_PCBP2,ENSG00000197114_ZGPAT,ENSG00000197119_SLC25A29,ENSG00000197121_PGAP1,ENSG00000197122_SRC,ENSG00000197124_ZNF682,ENSG00000197128_ZNF772,ENSG00000197134_ZNF257,ENSG00000197136_PCNX3,ENSG00000197140_ADAM32,ENSG00000197142_ACSL5,ENSG00000197147_LRRC8B,ENSG00000197150_ABCB8,ENSG00000197153_HIST1H3J,ENSG00000197157_SND1,ENSG00000197162_ZNF785,ENSG00000197170_PSMD12,ENSG00000197183_NOL4L,ENSG00000197208_SLC22A4,ENSG00000197217_ENTPD4,ENSG00000197223_C1D,ENSG00000197226_TBC1D9B,ENSG00000197238_HIST1H4J,ENSG00000197249_SERPINA1,ENSG00000197256_KANK2,ENSG00000197265_GTF2E2,ENSG00000197272_IL27,ENSG00000197283_SYNGAP1,ENSG00000197296_FITM2,ENSG00000197299_BLM,ENSG00000197302_ZNF720,ENSG00000197312_DDI2,ENSG00000197321_SVIL,ENSG00000197323_TRIM33,ENSG00000197324_LRP10,ENSG00000197329_PELI1,ENSG00000197343_ZNF655,ENSG00000197345_MRPL21,ENSG00000197355_UAP1L1,ENSG00000197362_ZNF786,ENSG00000197363_ZNF517,ENSG00000197372_ZNF675,ENSG00000197375_SLC22A5,ENSG00000197381_ADARB1,ENSG00000197385_ZNF860,ENSG00000197386_HTT,ENSG00000197405_C5AR1,ENSG00000197415_VEPH1,ENSG00000197429_IPP,ENSG00000197442_MAP3K5,ENSG00000197448_GSTK1,ENSG00000197451_HNRNPAB,ENSG00000197457_STMN3,ENSG00000197461_PDGFA,ENSG00000197465_GYPE,ENSG00000197471_SPN,ENSG00000197483_ZNF628,ENSG00000197497_ZNF665,ENSG00000197498_RPF2,ENSG00000197506_SLC28A3,ENSG00000197520_FAM177B,ENSG00000197530_MIB2,ENSG00000197535_MYO5A,ENSG00000197536_C5orf56,ENSG00000197540_GZMM,ENSG00000197548_ATG7,ENSG00000197555_SIPA1L1,ENSG00000197557_TTC30A,ENSG00000197558_SSPO,ENSG00000197561_ELANE,ENSG00000197562_RAB40C,ENSG00000197563_PIGN,ENSG00000197566_ZNF624,ENSG00000197579_TOPORS,ENSG00000197580_BCO2,ENSG00000197586_ENTPD6,ENSG00000197601_FAR1,ENSG00000197603_C5orf42,ENSG00000197608_ZNF841,ENSG00000197619_ZNF615,ENSG00000197620_CXorf40A,ENSG00000197622_CDC42SE1,ENSG00000197629_MPEG1,ENSG00000197632_SERPINB2,ENSG00000197635_DPP4,ENSG00000197646_PDCD1LG2,ENSG00000197653_DNAH10,ENSG00000197694_SPTAN1,ENSG00000197705_KLHL14,ENSG00000197712_FAM114A1,ENSG00000197713_RPE,ENSG00000197714_ZNF460,ENSG00000197721_CR1L,ENSG00000197724_PHF2,ENSG00000197728_RPS26,ENSG00000197746_PSAP,ENSG00000197747_S100A10,ENSG00000197756_RPL37A,ENSG00000197766_CFD,ENSG00000197771_MCMBP,ENSG00000197774_EME2,ENSG00000197776_KLHDC1,ENSG00000197779_ZNF81,ENSG00000197780_TAF13,ENSG00000197782_ZNF780A,ENSG00000197785_ATAD3A,ENSG00000197798_FAM118B,ENSG00000197808_ZNF461,ENSG00000197818_SLC9A8,ENSG00000197837_HIST4H4,ENSG00000197841_ZNF181,ENSG00000197852_FAM212B,ENSG00000197857_ZNF44,ENSG00000197858_GPAA1,ENSG00000197860_SGTB,ENSG00000197863_ZNF790,ENSG00000197872_FAM49A,ENSG00000197879_MYO1C,ENSG00000197885_NKIRAS1,ENSG00000197892_KIF13B,ENSG00000197894_ADH5,ENSG00000197903_HIST1H2BK,ENSG00000197912_SPG7,ENSG00000197928_ZNF677,ENSG00000197930_ERO1A,ENSG00000197933_ZNF823,ENSG00000197937_ZNF347,ENSG00000197943_PLCG2,ENSG00000197948_FCHSD1,ENSG00000197951_ZNF71,ENSG00000197956_S100A6,ENSG00000197958_RPL12,ENSG00000197959_DNM3,ENSG00000197961_ZNF121,ENSG00000197965_MPZL1,ENSG00000197969_VPS13A,ENSG00000197971_MBP,ENSG00000197976_AKAP17A,ENSG00000197982_C1orf122,ENSG00000197992_CLEC9A,ENSG00000197993_KEL,ENSG00000198000_NOL8,ENSG00000198001_IRAK4,ENSG00000198015_MRPL42,ENSG00000198018_ENTPD7,ENSG00000198019_FCGR1B,ENSG00000198026_ZNF335,ENSG00000198034_RPS4X,ENSG00000198039_ZNF273,ENSG00000198040_ZNF84,ENSG00000198042_MAK16,ENSG00000198046_ZNF667,ENSG00000198053_SIRPA,ENSG00000198055_GRK6,ENSG00000198056_PRIM1,ENSG00000198060_MARCH5,ENSG00000198081_ZBTB14,ENSG00000198087_CD2AP,ENSG00000198088_NUP62CL,ENSG00000198089_SFI1,ENSG00000198093_ZNF649,ENSG00000198105_ZNF248,ENSG00000198113_TOR4A,ENSG00000198121_LPAR1,ENSG00000198130_HIBCH,ENSG00000198131_ZNF544,ENSG00000198133_TMEM229B,ENSG00000198142_SOWAHC,ENSG00000198146_ZNF770,ENSG00000198157_HMGN5,ENSG00000198160_MIER1,ENSG00000198162_MAN1A2,ENSG00000198168_SVIP,ENSG00000198169_ZNF251,ENSG00000198171_DDRGK1,ENSG00000198176_TFDP1,ENSG00000198178_CLEC4C,ENSG00000198182_ZNF607,ENSG00000198189_HSD17B11,ENSG00000198198_SZT2,ENSG00000198205_ZXDA,ENSG00000198216_CACNA1E,ENSG00000198218_QRICH1,ENSG00000198223_CSF2RA,ENSG00000198231_DDX42,ENSG00000198242_RPL23A,ENSG00000198246_SLC29A3,ENSG00000198252_STYX,ENSG00000198258_UBL5,ENSG00000198265_HELZ,ENSG00000198270_TMEM116,ENSG00000198276_UCKL1,ENSG00000198286_CARD11,ENSG00000198298_ZNF485,ENSG00000198301_SDAD1,ENSG00000198315_ZKSCAN8,ENSG00000198324_FAM109A,ENSG00000198331_HYLS1,ENSG00000198336_MYL4,ENSG00000198342_ZNF442,ENSG00000198346_ZNF813,ENSG00000198355_PIM3,ENSG00000198356_ASNA1,ENSG00000198363_ASPH,ENSG00000198369_SPRED2,ENSG00000198373_WWP2,ENSG00000198380_GFPT1,ENSG00000198382_UVRAG,ENSG00000198393_ZNF26,ENSG00000198399_ITSN2,ENSG00000198408_MGEA5,ENSG00000198417_MT1F,ENSG00000198420_TCAF1,ENSG00000198429_ZNF69,ENSG00000198431_TXNRD1,ENSG00000198440_ZNF583,ENSG00000198453_ZNF568,ENSG00000198455_ZXDB,ENSG00000198464_ZNF480,ENSG00000198466_ZNF587,ENSG00000198478_SH3BGRL2,ENSG00000198482_ZNF808,ENSG00000198483_ANKRD35,ENSG00000198492_YTHDF2,ENSG00000198498_TMA16,ENSG00000198502_HLA-DRB5,ENSG00000198513_ATL1,ENSG00000198517_MAFK,ENSG00000198520_C1orf228,ENSG00000198521_ZNF43,ENSG00000198522_GPN1,ENSG00000198538_ZNF28,ENSG00000198546_ZNF511,ENSG00000198551_ZNF627,ENSG00000198554_WDHD1,ENSG00000198556_ZNF789,ENSG00000198561_CTNND1,ENSG00000198563_DDX39B,ENSG00000198574_SH2D1B,ENSG00000198585_NUDT16,ENSG00000198586_TLK1,ENSG00000198589_LRBA,ENSG00000198598_MMP17,ENSG00000198604_BAZ1A,ENSG00000198612_COPS8,ENSG00000198624_CCDC69,ENSG00000198625_MDM4,ENSG00000198642_KLHL9,ENSG00000198646_NCOA6,ENSG00000198648_STK39,ENSG00000198663_C6orf89,ENSG00000198668_CALM1,ENSG00000198673_FAM19A2,ENSG00000198677_TTC37,ENSG00000198682_PAPSS2,ENSG00000198689_SLC9A6,ENSG00000198690_FAN1,ENSG00000198692_EIF1AY,ENSG00000198695_MT-ND6,ENSG00000198700_IPO9,ENSG00000198707_CEP290,ENSG00000198712_MT-CO2,ENSG00000198715_GLMP,ENSG00000198718_FAM179B,ENSG00000198721_ECI2,ENSG00000198722_UNC13B,ENSG00000198727_MT-CYB,ENSG00000198728_LDB1,ENSG00000198730_CTR9,ENSG00000198734_F5,ENSG00000198736_MSRB1,ENSG00000198740_ZNF652,ENSG00000198742_SMURF1,ENSG00000198743_SLC5A3,ENSG00000198746_GPATCH3,ENSG00000198752_CDC42BPB,ENSG00000198755_RPL10A,ENSG00000198756_COLGALT2,ENSG00000198763_MT-ND2,ENSG00000198771_RCSD1,ENSG00000198780_FAM169A,ENSG00000198783_ZNF830,ENSG00000198785_GRIN3A,ENSG00000198786_MT-ND5,ENSG00000198791_CNOT7,ENSG00000198792_TMEM184B,ENSG00000198793_MTOR,ENSG00000198799_LRIG2,ENSG00000198804_MT-CO1,ENSG00000198805_PNP,ENSG00000198814_GK,ENSG00000198815_FOXJ3,ENSG00000198818_SFT2D1,ENSG00000198821_CD247,ENSG00000198824_CHAMP1,ENSG00000198825_INPP5F,ENSG00000198826_ARHGAP11A,ENSG00000198829_SUCNR1,ENSG00000198830_HMGN2,ENSG00000198832_SELENOM,ENSG00000198833_UBE2J1,ENSG00000198835_GJC2,ENSG00000198836_OPA1,ENSG00000198837_DENND4B,ENSG00000198839_ZNF277,ENSG00000198840_MT-ND3,ENSG00000198841_KTI12,ENSG00000198843_SELENOT,ENSG00000198846_TOX,ENSG00000198848_CES1,ENSG00000198851_CD3E,ENSG00000198853_RUSC2,ENSG00000198855_FICD,ENSG00000198856_OSTC,ENSG00000198858_R3HDM4,ENSG00000198860_TSEN15,ENSG00000198862_LTN1,ENSG00000198863_RUNDC1,ENSG00000198865_CCDC152,ENSG00000198873_GRK5,ENSG00000198874_TYW1,ENSG00000198876_DCAF12,ENSG00000198879_SFMBT2,ENSG00000198885_ITPRIPL1,ENSG00000198886_MT-ND4,ENSG00000198887_SMC5,ENSG00000198888_MT-ND1,ENSG00000198890_PRMT6,ENSG00000198892_SHISA4,ENSG00000198894_CIPC,ENSG00000198898_CAPZA2,ENSG00000198899_MT-ATP6,ENSG00000198900_TOP1,ENSG00000198901_PRC1,ENSG00000198908_BHLHB9,ENSG00000198909_MAP3K3,ENSG00000198911_SREBF2,ENSG00000198912_C1orf174,ENSG00000198915_RASGEF1A,ENSG00000198917_SPOUT1,ENSG00000198918_RPL39,ENSG00000198919_DZIP3,ENSG00000198920_KIAA0753,ENSG00000198924_DCLRE1A,ENSG00000198925_ATG9A,ENSG00000198929_NOS1AP,ENSG00000198931_APRT,ENSG00000198932_GPRASP1,ENSG00000198933_TBKBP1,ENSG00000198937_CCDC167,ENSG00000198938_MT-CO3,ENSG00000198945_L3MBTL3,ENSG00000198948_MFAP3L,ENSG00000198951_NAGA,ENSG00000198952_SMG5,ENSG00000198954_KIF1BP,ENSG00000198959_TGM2,ENSG00000198960_ARMCX6,ENSG00000198961_PJA2,ENSG00000198964_SGMS1,ENSG00000203326_ZNF525,ENSG00000203485_INF2,ENSG00000203666_EFCAB2,ENSG00000203667_COX20,ENSG00000203668_CHML,ENSG00000203705_TATDN3,ENSG00000203710_CR1,ENSG00000203737_GPR52,ENSG00000203747_FCGR3A,ENSG00000203760_CENPW,ENSG00000203791_METTL10,ENSG00000203797_DDO,ENSG00000203814_HIST2H2BF,ENSG00000203872_C6orf163,ENSG00000203879_GDI1,ENSG00000203880_PCMTD2,ENSG00000203896_LIME1,ENSG00000203965_EFCAB7,ENSG00000204010_IFIT1B,ENSG00000204020_LIPN,ENSG00000204070_SYS1,ENSG00000204084_INPP5B,ENSG00000204086_RPA4,ENSG00000204103_MAFB,ENSG00000204104_TRAF3IP1,ENSG00000204116_CHIC1,ENSG00000204120_GIGYF2,ENSG00000204130_RUFY2,ENSG00000204131_NHSL2,ENSG00000204138_PHACTR4,ENSG00000204149_AGAP6,ENSG00000204152_TIMM23B,ENSG00000204160_ZDHHC18,ENSG00000204161_C10orf128,ENSG00000204165_CXorf65,ENSG00000204178_TMEM57,ENSG00000204186_ZDBF2,ENSG00000204209_DAXX,ENSG00000204217_BMPR2,ENSG00000204219_TCEA3,ENSG00000204220_PFDN6,ENSG00000204227_RING1,ENSG00000204228_HSD17B8,ENSG00000204231_RXRB,ENSG00000204237_OXLD1,ENSG00000204248_COL11A2,ENSG00000204252_HLA-DOA,ENSG00000204256_BRD2,ENSG00000204257_HLA-DMA,ENSG00000204264_PSMB8,ENSG00000204267_TAP2,ENSG00000204271_SPIN3,ENSG00000204272_LINC01420,ENSG00000204287_HLA-DRA,ENSG00000204301_NOTCH4,ENSG00000204304_PBX2,ENSG00000204305_AGER,ENSG00000204308_RNF5,ENSG00000204310_AGPAT1,ENSG00000204315_FKBPL,ENSG00000204323_SMIM5,ENSG00000204344_STK19,ENSG00000204345_CD300LD,ENSG00000204348_DXO,ENSG00000204351_SKIV2L,ENSG00000204356_NELFE,ENSG00000204370_SDHD,ENSG00000204371_EHMT2,ENSG00000204386_NEU1,ENSG00000204387_C6orf48,ENSG00000204388_HSPA1B,ENSG00000204389_HSPA1A,ENSG00000204390_HSPA1L,ENSG00000204392_LSM2,ENSG00000204394_VARS,ENSG00000204397_CARD16,ENSG00000204406_MBD5,ENSG00000204420_C6orf25,ENSG00000204427_ABHD16A,ENSG00000204435_CSNK2B,ENSG00000204438_GPANK1,ENSG00000204439_C6orf47,ENSG00000204463_BAG6,ENSG00000204469_PRRC2A,ENSG00000204472_AIF1,ENSG00000204475_NCR3,ENSG00000204482_LST1,ENSG00000204498_NFKBIL1,ENSG00000204514_ZNF814,ENSG00000204516_MICB,ENSG00000204519_ZNF551,ENSG00000204520_MICA,ENSG00000204524_ZNF805,ENSG00000204525_HLA-C,ENSG00000204536_CCHCR1,ENSG00000204560_DHX16,ENSG00000204564_C6orf136,ENSG00000204568_MRPS18B,ENSG00000204569_PPP1R10,ENSG00000204574_ABCF1,ENSG00000204576_PRR3,ENSG00000204577_LILRB3,ENSG00000204580_DDR1,ENSG00000204590_GNL1,ENSG00000204592_HLA-E,ENSG00000204599_TRIM39,ENSG00000204604_ZNF468,ENSG00000204611_ZNF616,ENSG00000204613_TRIM10,ENSG00000204619_PPP1R11,ENSG00000204628_RACK1,ENSG00000204632_HLA-G,ENSG00000204634_TBC1D8,ENSG00000204642_HLA-F,ENSG00000204673_AKT1S1,ENSG00000204681_GABBR1,ENSG00000204713_TRIM27,ENSG00000204764_RANBP17,ENSG00000204815_TTC25,ENSG00000204822_MRPL53,ENSG00000204839_MROH6,ENSG00000204842_ATXN2,ENSG00000204843_DCTN1,ENSG00000204852_TCTN1,ENSG00000204856_FAM216A,ENSG00000204859_ZBTB48,ENSG00000204899_MZT1,ENSG00000204920_ZNF155,ENSG00000204922_UQCC3,ENSG00000204923_FBXO48,ENSG00000204936_CD177,ENSG00000204946_ZNF783,ENSG00000204947_ZNF425,ENSG00000204954_C12orf73,ENSG00000204977_TRIM13,ENSG00000205038_PKHD1L1,ENSG00000205045_SLFN12L,ENSG00000205060_SLC35B4,ENSG00000205133_TRIQK,ENSG00000205138_SDHAF1,ENSG00000205155_PSENEN,ENSG00000205189_ZBTB10,ENSG00000205208_C4orf46,ENSG00000205213_LGR4,ENSG00000205220_PSMB10,ENSG00000205250_E2F4,ENSG00000205268_PDE7A,ENSG00000205269_TMEM170B,ENSG00000205302_SNX2,ENSG00000205309_NT5M,ENSG00000205323_SARNP,ENSG00000205336_ADGRG1,ENSG00000205339_IPO7,ENSG00000205352_PRR13,ENSG00000205356_TECPR1,ENSG00000205413_SAMD9,ENSG00000205423_CNEP1R1,ENSG00000205464_ATP6AP1L,ENSG00000205531_NAP1L4,ENSG00000205542_TMSB4X,ENSG00000205544_TMEM256,ENSG00000205560_CPT1B,ENSG00000205581_HMGN1,ENSG00000205629_LCMT1,ENSG00000205639_MFSD2B,ENSG00000205643_CDPF1,ENSG00000205659_LIN52,ENSG00000205683_DPF3,ENSG00000205707_ETFRF1,ENSG00000205710_C17orf107,ENSG00000205726_ITSN1,ENSG00000205730_ITPRIPL2,ENSG00000205744_DENND1C,ENSG00000205758_CRYZL1,ENSG00000205765_C5orf51,ENSG00000205784_ARRDC5,ENSG00000205808_PLPP6,ENSG00000205846_CLEC6A,ENSG00000205903_ZNF316,ENSG00000205937_RNPS1,ENSG00000205981_DNAJC19,ENSG00000206053_HN1L,ENSG00000206172_HBA1,ENSG00000206177_HBM,ENSG00000206190_ATP10A,ENSG00000206344_HCG27,ENSG00000206418_RAB12,ENSG00000206503_HLA-A,ENSG00000206527_HACD2,ENSG00000206530_CFAP44,ENSG00000206557_TRIM71,ENSG00000206560_ANKRD28,ENSG00000206561_COLQ,ENSG00000206562_METTL6,ENSG00000211450_SELENOH,ENSG00000211455_STK38L,ENSG00000211456_SACM1L,ENSG00000211460_TSN,ENSG00000211584_SLC48A1,ENSG00000212124_TAS2R19,ENSG00000212126_TAS2R50,ENSG00000212127_TAS2R14,ENSG00000212128_TAS2R13,ENSG00000212719_C17orf51,ENSG00000212907_MT-ND4L,ENSG00000212916_MAP10,ENSG00000213015_ZNF580,ENSG00000213020_ZNF611,ENSG00000213024_NUP62,ENSG00000213047_DENND1B,ENSG00000213064_SFT2D2,ENSG00000213066_FGFR1OP,ENSG00000213079_SCAF8,ENSG00000213085_CFAP45,ENSG00000213088_ACKR1,ENSG00000213096_ZNF254,ENSG00000213139_CRYGS,ENSG00000213145_CRIP1,ENSG00000213186_TRIM59,ENSG00000213190_MLLT11,ENSG00000213203_GIMAP1,ENSG00000213204_RP3-382I10.7,ENSG00000213246_SUPT4H1,ENSG00000213281_NRAS,ENSG00000213337_ANKRD39,ENSG00000213339_QTRT1,ENSG00000213341_CHUK,ENSG00000213347_MXD3,ENSG00000213366_GSTM2,ENSG00000213380_COG8,ENSG00000213390_ARHGAP19,ENSG00000213397_HAUS7,ENSG00000213398_LCAT,ENSG00000213420_GPC2,ENSG00000213445_SIPA1,ENSG00000213462_ERV3-1,ENSG00000213463_SYNJ2BP,ENSG00000213465_ARL2,ENSG00000213516_RBMXL1,ENSG00000213523_SRA1,ENSG00000213533_TMEM110,ENSG00000213551_DNAJC9,ENSG00000213563_C8orf82,ENSG00000213585_VDAC1,ENSG00000213593_TMX2,ENSG00000213614_HEXA,ENSG00000213619_NDUFS3,ENSG00000213625_LEPROT,ENSG00000213626_LBH,ENSG00000213639_PPP1CB,ENSG00000213654_GPSM3,ENSG00000213672_NCKIPSD,ENSG00000213676_ATF6B,ENSG00000213694_S1PR3,ENSG00000213699_SLC35F6,ENSG00000213719_CLIC1,ENSG00000213722_DDAH2,ENSG00000213741_RPS29,ENSG00000213762_ZNF134,ENSG00000213782_DDX47,ENSG00000213799_ZNF845,ENSG00000213809_KLRK1,ENSG00000213859_KCTD11,ENSG00000213865_C8orf44,ENSG00000213889_PPM1N,ENSG00000213903_LTB4R,ENSG00000213906_LTB4R2,ENSG00000213918_DNASE1,ENSG00000213923_CSNK1E,ENSG00000213928_IRF9,ENSG00000213930_GALT,ENSG00000213949_ITGA1,ENSG00000213965_NUDT19,ENSG00000213967_ZNF726,ENSG00000213977_TAX1BP3,ENSG00000213983_AP1G2,ENSG00000213988_ZNF90,ENSG00000213995_NAXD,ENSG00000214013_GANC,ENSG00000214021_TTLL3,ENSG00000214022_REPIN1,ENSG00000214026_MRPL23,ENSG00000214029_ZNF891,ENSG00000214046_SMIM7,ENSG00000214063_TSPAN4,ENSG00000214078_CPNE1,ENSG00000214087_ARL16,ENSG00000214113_LYRM4,ENSG00000214114_MYCBP,ENSG00000214160_ALG3,ENSG00000214189_ZNF788,ENSG00000214193_SH3D21,ENSG00000214194_LINC00998,ENSG00000214212_C19orf38,ENSG00000214226_C17orf67,ENSG00000214253_FIS1,ENSG00000214274_ANG,ENSG00000214309_MBLAC1,ENSG00000214367_HAUS3,ENSG00000214413_BBIP1,ENSG00000214456_PLIN5,ENSG00000214517_PPME1,ENSG00000214530_STARD10,ENSG00000214595_EML6,ENSG00000214655_ZSWIM8,ENSG00000214688_C10orf105,ENSG00000214706_IFRD2,ENSG00000214717_ZBED1,ENSG00000214753_HNRNPUL2,ENSG00000214756_METTL12,ENSG00000214787_MS4A4E,ENSG00000214827_MTCP1,ENSG00000214941_ZSWIM7,ENSG00000214944_ARHGEF28,ENSG00000214954_LRRC69,ENSG00000214960_ISPD,ENSG00000215012_C22orf29,ENSG00000215021_PHB2,ENSG00000215041_NEURL4,ENSG00000215114_UBXN2B,ENSG00000215126_CBWD7,ENSG00000215193_PEX26,ENSG00000215251_FASTKD5,ENSG00000215252_GOLGA8B,ENSG00000215271_HOMEZ,ENSG00000215301_DDX3X,ENSG00000215305_VPS16,ENSG00000215375_MYL5,ENSG00000215421_ZNF407,ENSG00000215440_NPEPL1,ENSG00000215529_EFCAB8,ENSG00000215712_TMEM242,ENSG00000215717_TMEM167B,ENSG00000215788_TNFRSF25,ENSG00000215790_SLC35E2,ENSG00000215845_TSTD1,ENSG00000215883_CYB5RL,ENSG00000216490_IFI30,ENSG00000216937_CCDC7,ENSG00000217128_FNIP1,ENSG00000217555_CKLF,ENSG00000217930_PAM16,ENSG00000218739_CEBPZOS,ENSG00000219200_RNASEK,ENSG00000219481_NBPF1,ENSG00000219545_UMAD1,ENSG00000219626_FAM228B,ENSG00000220008_LINGO3,ENSG00000220205_VAMP2,ENSG00000221821_C6orf226,ENSG00000221823_PPP3R1,ENSG00000221829_FANCG,ENSG00000221838_AP4M1,ENSG00000221866_PLXNA4,ENSG00000221869_CEBPD,ENSG00000221883_ARIH2OS,ENSG00000221886_ZBED8,ENSG00000221909_FAM200A,ENSG00000221914_PPP2R2A,ENSG00000221923_ZNF880,ENSG00000221926_TRIM16,ENSG00000221944_TIGD1,ENSG00000221963_APOL6,ENSG00000221968_FADS3,ENSG00000221978_CCNL2,ENSG00000221983_UBA52,ENSG00000221994_ZNF630,ENSG00000221995_TIAF1,ENSG00000222009_BTBD19,ENSG00000222011_FAM185A,ENSG00000223401_RP11-211G3.2,ENSG00000223496_EXOSC6,ENSG00000223501_VPS52,ENSG00000223547_ZNF844,ENSG00000223865_HLA-DPB1,ENSG00000224051_CPTP,ENSG00000224470_ATXN1L,ENSG00000224531_SMIM13,ENSG00000224877_NDUFAF8,ENSG00000225190_PLEKHM1,ENSG00000225663_MCRIP1,ENSG00000225697_SLC26A6,ENSG00000225828_FAM229A,ENSG00000225830_ERCC6,ENSG00000225873_LINC00694,ENSG00000225921_NOL7,ENSG00000225940_C5orf67,ENSG00000225973_PIGBOS1,ENSG00000226124_FTCDNL1,ENSG00000226174_TEX22,ENSG00000226479_TMEM185B,ENSG00000226742_HSBP1L1,ENSG00000226761_TAS2R46,ENSG00000227051_C14orf132,ENSG00000227057_WDR46,ENSG00000227124_ZNF717,ENSG00000227268_KLLN,ENSG00000227345_PARG,ENSG00000227500_SCAMP4,ENSG00000227507_LTB,ENSG00000228300_C19orf24,ENSG00000228474_OST4,ENSG00000228486_LINC01125,ENSG00000228716_DHFR,ENSG00000229117_RPL41,ENSG00000229314_ORM1,ENSG00000229474_PATL2,ENSG00000229809_ZNF688,ENSG00000229833_PET100,ENSG00000230124_ACBD6,ENSG00000230510_PPP5D1,ENSG00000230989_HSBP1,ENSG00000231389_HLA-DPA1,ENSG00000231500_RPS18,ENSG00000231672_DIRC3,ENSG00000231925_TAPBP,ENSG00000232112_TMA7,ENSG00000232119_MCTS1,ENSG00000232125_DYTN,ENSG00000232388_LINC00493,ENSG00000232653_GOLGA8N,ENSG00000232810_TNF,ENSG00000232859_LYRM9,ENSG00000233276_GPX1,ENSG00000233757_AC092835.2,ENSG00000233822_HIST1H2BN,ENSG00000233927_RPS28,ENSG00000234127_TRIM26,ENSG00000234284_ZNF879,ENSG00000234444_ZNF736,ENSG00000234545_FAM133B,ENSG00000234616_JRK,ENSG00000234745_HLA-B,ENSG00000235106_LINC00094,ENSG00000235162_C12orf75,ENSG00000235169_SMIM1,ENSG00000235173_HGH1,ENSG00000235194_PPP1R3E,ENSG00000235453_TOPORS-AS1,ENSG00000235568_NFAM1,ENSG00000235750_KIAA0040,ENSG00000235863_B3GALT4,ENSG00000236104_ZBTB22,ENSG00000236287_ZBED5,ENSG00000236320_SLFN14,ENSG00000236609_ZNF853,ENSG00000237172_B3GNT9,ENSG00000237190_CDKN2AIPNL,ENSG00000237440_ZNF737,ENSG00000237441_RGL2,ENSG00000237489_LINC00959,ENSG00000237541_HLA-DQA2,ENSG00000237649_KIFC1,ENSG00000237765_FAM200B,ENSG00000238083_LRRC37A2,ENSG00000238227_C9orf69,ENSG00000238243_OR2W3,ENSG00000239264_TXNDC5,ENSG00000239305_RNF103,ENSG00000239306_RBM14,ENSG00000239382_ALKBH6,ENSG00000239521_GATS,ENSG00000239672_NME1,ENSG00000239697_TNFSF12,ENSG00000239713_APOBEC3G,ENSG00000239779_WBP1,ENSG00000239789_MRPS17,ENSG00000239839_DEFA3,ENSG00000239857_GET4,ENSG00000239900_ADSL,ENSG00000239998_LILRA2,ENSG00000240038_AMY2B,ENSG00000240053_LY6G5B,ENSG00000240065_PSMB9,ENSG00000240230_COX19,ENSG00000240303_ACAD11,ENSG00000240344_PPIL3,ENSG00000240583_AQP1,ENSG00000240682_ISY1,ENSG00000240849_TMEM189,ENSG00000240857_RDH14,ENSG00000240891_PLCXD2,ENSG00000240972_MIF,ENSG00000241058_NSUN6,ENSG00000241106_HLA-DOB,ENSG00000241127_YAE1D1,ENSG00000241258_CRCP,ENSG00000241343_RPL36A,ENSG00000241399_CD302,ENSG00000241468_ATP5J2,ENSG00000241489_AF011889.5,ENSG00000241553_ARPC4,ENSG00000241685_ARPC1A,ENSG00000241837_ATP5O,ENSG00000241839_PLEKHO2,ENSG00000241852_C8orf58,ENSG00000241878_PISD,ENSG00000241973_PI4KA,ENSG00000242028_HYPK,ENSG00000242110_AMACR,ENSG00000242247_ARFGAP3,ENSG00000242259_C22orf39,ENSG00000242372_EIF6,ENSG00000242485_MRPL20,ENSG00000242498_ARPIN,ENSG00000242550_SERPINB10,ENSG00000242574_HLA-DMB,ENSG00000242612_DECR2,ENSG00000242616_GNG10,ENSG00000242689_CNTF,ENSG00000242802_AP5Z1,ENSG00000243147_MRPL33,ENSG00000243156_MICAL3,ENSG00000243244_STON1,ENSG00000243279_PRAF2,ENSG00000243317_C7orf73,ENSG00000243335_KCTD7,ENSG00000243364_EFNA4,ENSG00000243414_TICAM2,ENSG00000243449_C4orf48,ENSG00000243646_IL10RB,ENSG00000243660_ZNF487,ENSG00000243667_WDR92,ENSG00000243696_RP5-966M1.6,ENSG00000243811_APOBEC3D,ENSG00000243927_MRPS6,ENSG00000243943_ZNF512,ENSG00000244005_NFS1,ENSG00000244038_DDOST,ENSG00000244045_TMEM199,ENSG00000244165_P2RY11,ENSG00000244187_TMEM141,ENSG00000244242_IFITM10,ENSG00000244462_RBM12,ENSG00000244482_LILRA6,ENSG00000244509_APOBEC3C,ENSG00000244607_CCDC13,ENSG00000244617_ASPRV1,ENSG00000244687_UBE2V1,ENSG00000244734_HBB,ENSG00000244754_N4BP2L2,ENSG00000245680_ZNF585B,ENSG00000245848_CEBPA,ENSG00000246705_H2AFJ,ENSG00000246922_UBAP1L,ENSG00000247077_PGAM5,ENSG00000247315_ZCCHC3,ENSG00000247595_SPTY2D1-AS1,ENSG00000247596_TWF2,ENSG00000247626_MARS2,ENSG00000248099_INSL3,ENSG00000248333_CDK11B,ENSG00000248483_POU5F2,ENSG00000248592_TMEM110-MUSTN1,ENSG00000248643_RBM14-RBM4,ENSG00000248712_CCDC153,ENSG00000248905_FMN1,ENSG00000249115_HAUS5,ENSG00000249437_NAIP,ENSG00000249471_ZNF324B,ENSG00000249709_ZNF564,ENSG00000249915_PDCD6,ENSG00000249992_TMEM158,ENSG00000250091_DNAH10OS,ENSG00000250254_PTTG2,ENSG00000250305_KIAA1456,ENSG00000250312_ZNF718,ENSG00000250317_SMIM20,ENSG00000250361_GYPB,ENSG00000250479_CHCHD10,ENSG00000250510_GPR162,ENSG00000250565_ATP6V1E2,ENSG00000250571_GLI4,ENSG00000250644_RP11-295K3.1,ENSG00000250673_RP11-6L6.2,ENSG00000250722_SELENOP,ENSG00000251192_ZNF674,ENSG00000251247_ZNF345,ENSG00000251369_ZNF550,ENSG00000253250_C8orf88,ENSG00000253251_CTC-534A2.2,ENSG00000253276_CCDC71L,ENSG00000253710_ALG11,ENSG00000253719_ATXN7L3B,ENSG00000253729_PRKDC,ENSG00000253797_UTP14C,ENSG00000254004_ZNF260,ENSG00000254087_LYN,ENSG00000254093_PINX1,ENSG00000254415_SIGLEC14,ENSG00000254469_RP11-849H4.2,ENSG00000254470_AP5B1,ENSG00000254505_CHMP4A,ENSG00000254685_FPGT,ENSG00000254788_CKLF-CMTM1,ENSG00000254858_MPV17L2,ENSG00000254901_BORCS8,ENSG00000254986_DPP3,ENSG00000254995_STX16-NPEPL1,ENSG00000254996_ANKHD1-EIF4EBP3,ENSG00000254999_BRK1,ENSG00000255112_CHMP1B,ENSG00000255150_EID3,ENSG00000255221_CARD17,ENSG00000255302_EID1,ENSG00000255374_TAS2R43,ENSG00000255398_HCAR3,ENSG00000255423_EBLN2,ENSG00000255529_POLR2M,ENSG00000255561_FDXACB1,ENSG00000255587_RAB44,ENSG00000255837_TAS2R20,ENSG00000256043_CTSO,ENSG00000256053_APOPT1,ENSG00000256060_TRAPPC2B,ENSG00000256087_ZNF432,ENSG00000256188_TAS2R30,ENSG00000256223_ZNF10,ENSG00000256229_ZNF486,ENSG00000256235_SMIM3,ENSG00000256269_HMBS,ENSG00000256294_ZNF225,ENSG00000256436_TAS2R31,ENSG00000256525_POLG2,ENSG00000256537_SMIM10L1,ENSG00000256591_RP11-286N22.8,ENSG00000256660_CLEC12B,ENSG00000256683_ZNF350,ENSG00000256771_ZNF253,ENSG00000256812_CAPNS2,ENSG00000257017_HP,ENSG00000257093_KIAA1147,ENSG00000257103_LSM14A,ENSG00000257108_NHLRC4,ENSG00000257218_GATC,ENSG00000257315_ZBED6,ENSG00000257335_MGAM,ENSG00000257365_FNTB,ENSG00000257594_GALNT4,ENSG00000257704_INAFM1,ENSG00000257727_CNPY2,ENSG00000257743_MGAM2,ENSG00000257923_CUX1,ENSG00000258102_MAP1LC3B2,ENSG00000258227_CLEC5A,ENSG00000258289_CHURC1,ENSG00000258311_RP11-644F5.10,ENSG00000258315_C17orf49,ENSG00000258429_PDF,ENSG00000258839_MC1R,ENSG00000258890_CEP95,ENSG00000259030_FPGT-TNNI3K,ENSG00000259207_ITGB3,ENSG00000259431_THTPA,ENSG00000259494_MRPL46,ENSG00000259529_RP11-468E2.4,ENSG00000259956_RBM15B,ENSG00000260007_RP11-315D16.2,ENSG00000260286_C6orf229,ENSG00000260314_MRC1,ENSG00000260861_RP4-576H24.4,ENSG00000260916_CCPG1,ENSG00000261150_EPPK1,ENSG00000261221_ZNF865,ENSG00000261236_BOP1,ENSG00000261371_PECAM1,ENSG00000261609_GAN,ENSG00000261884_CTC-479C5.12,ENSG00000262246_CORO7,ENSG00000262814_MRPL12,ENSG00000262919_FAM58A,ENSG00000263001_GTF2I,ENSG00000263002_ZNF234,ENSG00000263264_CTB-133G6.1,ENSG00000263465_SRSF8,ENSG00000263528_IKBKE,ENSG00000263874_LINC00672,ENSG00000263956_NBPF11,ENSG00000263961_C1orf186,ENSG00000264343_NOTCH2NL,ENSG00000264364_DYNLL2,ENSG00000264522_OTUD7B,ENSG00000265241_RBM8A,ENSG00000265354_TIMM23,ENSG00000265491_RNF115,ENSG00000265681_RPL17,ENSG00000265808_SEC22B,ENSG00000265972_TXNIP,ENSG00000266028_SRGAP2,ENSG00000266074_BAHCC1,ENSG00000266094_RASSF5,ENSG00000266173_STRADA,ENSG00000266265_KLF14,ENSG00000266338_NBPF15,ENSG00000266412_NCOA4,ENSG00000266472_MRPS21,ENSG00000266714_MYO15B,ENSG00000267041_ZNF850,ENSG00000267216_AC010642.1,ENSG00000267508_ZNF285,ENSG00000267680_ZNF224,ENSG00000267796_LIN37,ENSG00000268043_NBPF12,ENSG00000269313_MAGIX,ENSG00000269335_IKBKG,ENSG00000269343_ZNF587B,ENSG00000269404_SPIB,ENSG00000269556_TMEM185A,ENSG00000269713_NBPF9,ENSG00000269743_SLC25A53,ENSG00000269858_EGLN2,ENSG00000270170_NCBP2-AS2,ENSG00000270629_NBPF14,ENSG00000270647_TAF15,ENSG00000271092_TMEM56-RWDD3,ENSG00000271254_AC240274.1,ENSG00000271303_SRXN1,ENSG00000271383_NBPF19,ENSG00000271425_NBPF10,ENSG00000271503_CCL5,ENSG00000271601_LIX1L,ENSG00000271605_MILR1,ENSG00000272031_ANKRD34A,ENSG00000272047_GTF2H5,ENSG00000272325_NUDT3,ENSG00000272333_KMT2B,ENSG00000272391_POM121C,ENSG00000272398_CD24,ENSG00000272602_ZNF595,ENSG00000272617_COG8,ENSG00000272886_DCP1A,ENSG00000272916_RP11-574K11.31,ENSG00000273136_NBPF26,ENSG00000273542_HIST1H4K,ENSG00000273559_CWC25,ENSG00000273611_ZNHIT3,ENSG00000273703_HIST1H2BM,ENSG00000273748_AL592183.1,ENSG00000273749_CYFIP1,ENSG00000273802_HIST1H2BG,ENSG00000273820_USP27X,ENSG00000273841_TAF9,ENSG00000273899_NOL12,ENSG00000273983_HIST1H3G,ENSG00000274180_NATD1,ENSG00000274211_SOCS7,ENSG00000274267_HIST1H3B,ENSG00000274290_HIST1H2BE,ENSG00000274349_ZNF658,ENSG00000274523_RCC1L,ENSG00000274618_HIST1H4F,ENSG00000274641_HIST1H2BO,ENSG00000274750_HIST1H3E,ENSG00000274997_HIST1H2AH,ENSG00000275023_MLLT6,ENSG00000275052_PPP4R3B,ENSG00000275066_SYNRG,ENSG00000275074_NUDT18,ENSG00000275111_ZNF2,ENSG00000275126_HIST1H4L,ENSG00000275183_LENG9,ENSG00000275221_HIST1H2AK,ENSG00000275302_CCL4,ENSG00000275342_SGK223,ENSG00000275379_HIST1H3I,ENSG00000275395_FCGBP,ENSG00000275464_CH507-9B2.5,ENSG00000275700_AATF,ENSG00000275713_HIST1H2BH,ENSG00000275714_HIST1H3A,ENSG00000275835_TUBGCP5,ENSG00000275895_U2AF1L5,ENSG00000276023_DUSP14,ENSG00000276043_UHRF1,ENSG00000276045_ORAI1,ENSG00000276070_CCL4L2,ENSG00000276180_HIST1H4I,ENSG00000276231_PIK3R6,ENSG00000276234_TADA2A,ENSG00000276289_KCNE1B,ENSG00000276293_PIP4K2B,ENSG00000276368_HIST1H2AJ,ENSG00000276410_HIST1H2BB,ENSG00000276644_DACH1,ENSG00000276903_HIST1H2AL,ENSG00000276966_HIST1H4E,ENSG00000277075_HIST1H2AE,ENSG00000277149_TYW1B,ENSG00000277157_HIST1H4D,ENSG00000277161_PIGW,ENSG00000277203_F8A1,ENSG00000277224_HIST1H2BF,ENSG00000277443_MARCKS,ENSG00000277462_ZNF670,ENSG00000277481_PKD1L3,ENSG00000277632_CCL3,ENSG00000277775_HIST1H3F,ENSG00000277791_PSMB3,ENSG00000277972_CISD3,ENSG00000278053_DDX52,ENSG00000278129_ZNF8,ENSG00000278195_SSTR3,ENSG00000278259_MYO19,ENSG00000278272_HIST1H3C,ENSG00000278311_GGNBP2,ENSG00000278318_ZNF229,ENSG00000278463_HIST1H2AB,ENSG00000278535_DHRS11,ENSG00000278540_ACACA,ENSG00000278588_HIST1H2BI,ENSG00000278619_MRM1,ENSG00000278637_HIST1H4A,ENSG00000278705_HIST1H4B,ENSG00000278828_HIST1H3H,ENSG00000278845_MRPL45,ENSG00000279346_AC104389.1,ENSG00000279457_FO538757.1,ENSG00000279576_AP000769.1,ENSG00000279765_RP11-437B10.1,ENSG00000280184_AL023806.1,ENSG00000280260_AC017028.1,ENSG00000280433_CH507-9B2.9,ENSG00000280789_PAGR1,ENSG00000281106_RP11-327P2.7,ENSG00000282034_RP11-2C24.9,ENSG00000282608_ADORA3,ENSG00000282988_RP1-34B20.21,ENSG00000283199_ABC13-47488600E17.1,ENSG00000283378_CH17-296N19.1,ENSG00000283384_RP11-153I24.5,ENSG00000283652_WDFY4
[truncated: 4,205,501 more chars]
